# Supplementary material for: Mechanosensitive pore opening of a prokaryotic voltage-gated sodium channel
Source: eLife. 2023 Mar 13;12:e79271. doi: 10.7554/eLife.79271 (PMC10038658; doi:10.7554/eLife.79271)
Supplement: Figure 1—source data 1. [file elife-79271-fig1-data1.xlsx]

## Sheet: Figure 1D
Conductance normalized to maximum conductance of control
Nav1.5	Control		Shear			WT NaChBac	Control		Shear			T220A NaChBac	Control		Shear
Voltage (mV)	Mean	SEM	Mean	SEM		Voltage (mV)	Mean	SEM	Mean	SEM		Voltage (mV)	Mean	SEM	Mean	SEM
-100	0.00166851	0.000768542	0.00332277	0.00129578		-80	0.0157067	0.00595903	0.0142972	0.00404204		-120	0.0116051	0.00261749	0.0209235	0.00801291
-95	0.0010878	0.000698845	0.00245102	0.00112175		-70	0.03766	0.0066889	0.0704267	0.0182732		-110	0.0121393	0.0032359	0.014261	0.00514214
-90	0.0024919	0.000526854	0.00308121	0.00127944		-60	0.154073	0.032388	0.309585	0.0695698		-100	0.016129	0.00448854	0.017809	0.00650159
-85	0.00623547	0.00139532	0.00782715	0.00171082		-50	0.394656	0.0607544	0.745045	0.12254		-90	0.0396006	0.0109575	0.063272	0.0225198
-80	0.0199552	0.00421666	0.0266862	0.00563149		-40	0.658699	0.0705213	1.15112	0.120431		-80	0.179416	0.0425753	0.34287	0.094422
-75	0.0572899	0.0110743	0.0804238	0.0157591		-30	0.82864	0.0527701	1.36215	0.115121		-70	0.562769	0.107839	0.924141	0.15313
-70	0.141035	0.0214724	0.20387	0.0340541		-20	0.947603	0.024979	1.46362	0.114729		-60	0.84136	0.066775	1.27471	0.0716317
-65	0.290666	0.0280505	0.426276	0.0501685		-10	0.985818	0.0184987	1.47878	0.109671		-50	0.970419	0.0170418	1.35668	0.0791019
-60	0.48605	0.0325565	0.683331	0.0576338		0	0.978577	0.00216592	1.44352	0.107719		-40	0.995301	0.00370954	1.33661	0.0796037
-55	0.657029	0.0308199	0.898116	0.0555545
-50	0.788211	0.0253048	1.05088	0.0501912
-45	0.886358	0.0175417	1.15376	0.0441583
-40	0.950353	0.0121338	1.22328	0.039157
-35	0.992217	0.0064307	1.26171	0.0354129
-30	1.01295	0.00293998	1.28273	0.0338424
-25	1.01803	0.000929824	1.28289	0.0323758
-20	1.01019	0.00144118	1.26717	0.0314558
