# Supplementary material for: Mechanosensitive pore opening of a prokaryotic voltage-gated sodium channel
Source: eLife. 2023 Mar 13;12:e79271. doi: 10.7554/eLife.79271 (PMC10038658; doi:10.7554/eLife.79271)
Supplement: Figure 1—source data 2. [file elife-79271-fig1-data2.xlsx]

## Sheet: Supplement 1C
Time constant of activation (ms)																		Time constant of activation (ms) at -30 mV
Nav1.5	Control		Shear			WT NaChBac	Control		Shear			T220A NaChBac	Control		Shear				Control		Shear
Voltage (mV)	Mean	SEM	Mean	SEM		Voltage (mV)	Mean	SEM	Mean	SEM		Voltage (mV)	Mean	SEM	Mean	SEM			Mean	SEM	Mean	SEM
-60	1.33681	0.0645644	1.08367	0.0705833		-50	49.6715	11.328	40.7079	13.9436		-70	87.2077	19.1138	54.0923	11.7528		Nav1.5	18.5592	3.35219	11.5607	2.54307
-55	1.27808	0.077862	0.897704	0.047921		-40	29.8826	5.02669	20.265	4.97806		-60	49.9012	13.456	31.8038	10.885		WT NaChBac	8.48903	1.77598	4.50176	0.70232
-50	0.999853	0.0604648	0.73892	0.0393364		-30	18.5592	3.35219	11.5607	2.54307		-50	26.8585	8.2034	13.3957	3.8988		T220A NaChBac	0.49478	0.0448667	0.42729	0.0301732
-45	0.832954	0.0576427	0.630253	0.03263		-20	13.8738	2.49205	8.25635	1.91246		-40	14.2541	3.6903	6.9462	1.422
-40	0.678462	0.0536311	0.536702	0.0327968		-10	9.41303	1.46431	6.02373	1.40937		-30	8.489	1.776	4.5018	0.7023
-35	0.582422	0.05229	0.470928	0.0323149		0	6.56603	0.880935	4.60728	0.984337		-20	5.9213	1.0842	3.0637	0.3097
-30	0.49478	0.0448667	0.42729	0.0301732								-10	4.1239	0.6463	2.3486	0.2103
-25	0.431389	0.042557	0.387075	0.0307378								0	3.1147	0.453	1.9134	0.1776
-20	0.388624	0.041071	0.347061	0.03363
-15	0.33738	0.0462152	0.298462	0.0395903
-10	0.300915	0.0378287	0.290397	0.0276673

## Sheet: Supplement 1D
Time constant of inactivation (ms)												Time constant of inactivation (ms) at -30 mV
Nav1.5	Control		Shear			WT NaChBac	Control		Shear				Control		Shear
Voltage (mV)	Mean	SEM	Mean	SEM		Voltage (mV)	Mean	SEM	Mean	SEM			Mean	SEM	Mean	SEM
-60	1.61408	0.30461	1.42586	0.215929		-50	202.07	34.9783	127.799	12.337		Nav1.5	0.770013	0.0687455	0.529326	0.0406061
-55	1.30252	0.0776764	1.05422	0.0848421		-40	208.872	43.2302	152.873	39.5843		WT NaChBac	198.752	41.49	143.126	29.6253
-50	1.14037	0.0932429	0.852543	0.0611733		-30	198.752	41.49	143.126	29.6253
-45	0.942877	0.0563627	0.716954	0.0464402		-20	175.468	32.6678	129.678	21.6264
-40	0.884228	0.0754135	0.64749	0.0531037		-10	174.654	32.2341	135.104	23.6697
-35	0.8049	0.0597541	0.585364	0.0440759		0	178.675	32.6164	127.886	19.7887
-30	0.770013	0.0687455	0.529326	0.0406061
-25	0.743602	0.0689984	0.504576	0.0434395
-20	0.709416	0.0705608	0.499509	0.0386052
-15	0.733894	0.0752563	0.527724	0.0499968
-10	0.682004	0.0705123	0.470119	0.0380113

## Sheet: Supplement 1E
Peak current density (pA/pF)																											Max peak current density (pA/pF)
Nav1.5	Control		Shear		Fitted curves				WT NaChBac	Control		Shear		Fitted curves				T220A NaChBac	Control		Shear		Fitted curves					Control		Shear
Voltage (mV)	Mean	SEM	Mean	SEM	Voltage (mV)	Control	Shear		Voltage (mV)	Mean	SEM	Mean	SEM	Voltage (mV)	Control	Shear		Voltage (mV)	Mean	SEM	Mean	SEM	Voltage (mV)	Control	Shear			Mean	SEM	Mean	SEM
-100	-0.380025	0.181761	-0.754783	0.30581	-99.697	-0.368698	-0.367383		-80	-0.903288	0.268282	-0.980035	0.328973	-80	-1.12166	-1.71078		-100	-4.4299	1.24	-4.1524	1.2679	-99.394	-2.1485	-2.0218		Nav1.5	-134.341	16.3635	-163.968	18.5169
-95	-0.257621	0.177337	-0.535938	0.251622	-98.4849	-0.443931	-0.448829		-70	-2.58317	0.914538	-4.49973	1.56347	-78.7879	-1.29435	-2.01123		-90	-11.0849	4.6004	-13.6989	5.4449	-98.1818	-2.6471	-2.5707		WT NaChBac	-36.995	9.12664	-59.175	15.4892
-90	-0.54209	0.114813	-0.666747	0.27617	-97.2728	-0.534428	-0.548239		-60	-10.3459	4.02076	-20.9512	8.39166	-77.5758	-1.49277	-2.36277		-80	-47.7749	20.1744	-75.7325	29.8647	-96.9697	-3.2598	-3.2671		T220A NaChBac	-214.644	60.3813	-281.799	73.696
-85	-1.34499	0.258852	-1.58766	0.257891	-96.0606	-0.643259	-0.669544		-50	-23.0018	7.81317	-43.1954	15.1252	-76.3637	-1.72048	-2.77346		-70	-150.345	62.5424	-218.927	78.8995	-95.7576	-4.012	-4.1495
-80	-4.20049	0.774856	-5.30529	0.856572	-94.8485	-0.7741	-0.817524		-40	-32.998	9.57895	-56.4669	16.0695	-75.1516	-1.98146	-3.25241		-60	-198.706	60.2643	-273.375	71.8644	-94.5455	-4.9344	-5.2665
-75	-11.5493	1.91739	-15.5365	2.41384	-93.6364	-0.93135	-0.99798		-30	-36.0617	9.36036	-58.1631	15.0393	-73.9394	-2.28009	-3.8098		-50	-200.384	53.6502	-252.951	63.87	-93.3334	-6.0638	-6.6779
-70	-27.6742	4.12451	-38.5898	6.16087	-92.4243	-1.12027	-1.21796		-20	-35.6364	8.67908	-54.5762	13.6449	-72.7273	-2.62119	-4.45691		-40	-175.26	45.2666	-211.276	53.5097	-92.1212	-7.4441	-8.458
-65	-54.8359	6.77985	-78.0205	11.3306	-91.2122	-1.34713	-1.48598		-10	-31.7906	7.44405	-47.3292	11.4704	-71.5152	-3.00997	-5.20607		-30	-144.014	36.8629	-169.888	43.576	-90.9091	-9.1274	-10.6974
-60	-87.3316	9.73859	-118.2	15.4278	-90	-1.61943	-1.81238		0	-26.5088	6.22104	-39.2132	9.76859	-70.3031	-3.45206	-6.07052		-20	-114.145	28.939	-131.745	34.6852	-89.697	-11.1749	-13.5057
-55	-112.248	12.9066	-145.76	17.6046	-88.7879	-1.94606	-2.2096							-69.091	-3.95339	-7.06417							-88.4849	-13.657	-17.0134
-50	-127.109	15.2708	-159.426	18.7032	-87.5758	-2.3376	-2.69266							-67.8788	-4.52013	-8.20128							-87.2728	-16.6543	-21.3727
-45	-133.688	16.3988	-162.455	18.6113	-86.3637	-2.80655	-3.27957							-66.6667	-5.15853	-9.49591							-86.0606	-20.2559	-26.7566
-40	-133.136	16.5597	-158.862	17.9135	-85.1516	-3.36769	-3.99189							-65.4546	-5.87476	-10.9612							-84.8485	-24.5586	-33.3542
-35	-128.067	15.9348	-150.112	16.8397	-83.9394	-4.03837	-4.85529							-64.2425	-6.67463	-12.6084							-83.6364	-29.6623	-41.3609
-30	-119.619	14.9851	-138.49	15.3981	-82.7273	-4.83887	-5.90018							-63.0304	-7.5633	-14.4461							-82.4243	-35.6651	-50.963
-25	-108.85	13.6043	-124.356	13.6912	-81.5152	-5.79279	-7.16232							-61.8182	-8.5449	-16.4783							-81.2122	-42.6541	-62.3131
-20	-96.8073	12.1391	-108.975	12.0068	-80.3031	-6.92734	-8.68341							-60.6061	-9.62211	-18.7039							-80	-50.6946	-75.4985
					-79.091	-8.27361	-10.5115							-59.394	-10.7957	-21.1149							-78.7879	-59.8164	-90.5049
					-77.8788	-9.86677	-12.7014							-58.1819	-12.0641	-23.6955							-77.5758	-69.999	-107.182
					-76.6667	-11.7459	-15.314							-56.9698	-13.4229	-26.4217							-76.3637	-81.1588	-125.219
					-75.4546	-13.9539	-18.4159							-55.7576	-14.8646	-29.2609							-75.1516	-93.1393	-144.147
					-74.2425	-16.5364	-22.0776							-54.5455	-16.3784	-32.1732							-73.9394	-105.711	-163.368
					-73.0303	-19.5406	-26.3703							-53.3334	-17.9502	-35.1126							-72.7273	-118.581	-182.214
					-71.8182	-23.013	-31.3616							-52.1213	-19.5628	-38.0295							-71.5152	-131.411	-200.031
					-70.6061	-26.9969	-37.109							-50.9092	-21.1963	-40.8736							-70.3031	-143.853	-216.255
					-69.394	-31.5278	-43.6526							-49.697	-22.8293	-43.5965							-69.091	-155.573	-230.47
					-68.1819	-36.6294	-51.0051							-48.4849	-24.4391	-46.1552							-67.8788	-166.292	-242.439
					-66.9697	-42.3075	-59.1426							-47.2728	-26.0035	-48.5136							-66.6667	-175.798	-252.097
					-65.7576	-48.5448	-67.9958							-46.0607	-27.5013	-50.6446							-65.4546	-183.963	-259.519
					-64.5455	-55.2959	-77.4448							-44.8486	-28.9134	-52.5304							-64.2425	-190.737	-264.883
					-63.3334	-62.4841	-87.3183							-43.6364	-30.2238	-54.1624							-63.0304	-196.14	-268.42
					-62.1213	-70.0006	-97.4007							-42.4243	-31.42	-55.5404							-61.8182	-200.247	-270.388
					-60.9091	-77.7077	-107.445							-41.2122	-32.4931	-56.6711							-60.6061	-203.168	-271.038
					-59.697	-85.4456	-117.194							-40.0001	-33.4381	-57.5667							-59.394	-205.03	-270.605
					-58.4849	-93.0427	-126.399							-38.788	-34.2535	-58.2431							-58.1819	-205.97	-269.294
					-57.2728	-100.328	-134.845							-37.5758	-34.9407	-58.7188							-56.9698	-206.122	-267.279
					-56.0607	-107.145	-142.365							-36.3637	-35.5037	-59.0134							-55.7576	-205.609	-264.708
					-54.8485	-113.36	-148.847							-35.1516	-35.9487	-59.1465							-54.5455	-204.541	-261.699
					-53.6364	-118.875	-154.24							-33.9395	-36.2831	-59.1372							-53.3334	-203.017	-258.347
					-52.4243	-123.624	-158.542							-32.7274	-36.5153	-59.0036							-52.1213	-201.12	-254.728
					-51.2122	-127.582	-161.798							-31.5152	-36.6542	-58.7621							-50.9092	-198.919	-250.903
					-50.0001	-130.752	-164.08							-30.3031	-36.7087	-58.4279							-49.697	-196.472	-246.918
					-48.7879	-133.165	-165.481							-29.091	-36.6876	-58.0142							-48.4849	-193.829	-242.811
					-47.5758	-134.871	-166.103							-27.8789	-36.5993	-57.5328							-47.2728	-191.028	-238.608
					-46.3637	-135.93	-166.048							-26.6667	-36.4516	-56.994							-46.0607	-188.1	-234.333
					-45.1516	-136.413	-165.415							-25.4546	-36.2519	-56.4067							-44.8486	-185.072	-230.001
					-43.9395	-136.387	-164.294							-24.2425	-36.0067	-55.7784							-43.6364	-181.963	-225.627
					-42.7273	-135.92	-162.765							-23.0304	-35.722	-55.1158							-42.4243	-178.791	-221.22
					-41.5152	-135.076	-160.899							-21.8183	-35.403	-54.4244							-41.2122	-175.568	-216.789
					-40.3031	-133.912	-158.756							-20.6061	-35.0544	-53.7088							-40.0001	-172.306	-212.338
					-39.091	-132.478	-156.387							-19.394	-34.6804	-52.973							-38.788	-169.012	-207.872
					-37.8789	-130.82	-153.834							-18.1819	-34.2846	-52.2204							-37.5758	-165.692	-203.395
					-36.6667	-128.974	-151.132							-16.9698	-33.87	-51.4537							-36.3637	-162.353	-198.91
					-35.4546	-126.974	-148.311							-15.7576	-33.4394	-50.6754							-35.1516	-158.999	-194.418
					-34.2425	-124.846	-145.392							-14.5455	-32.9952	-49.8873							-33.9395	-155.632	-189.921
					-33.0304	-122.614	-142.397							-13.3334	-32.5394	-49.0911							-32.7274	-152.255	-185.42
					-31.8183	-120.297	-139.339							-12.1213	-32.0736	-48.2883							-31.5152	-148.871	-180.917
					-30.6061	-117.91	-136.232							-10.9092	-31.5994	-47.4798							-30.3031	-145.48	-176.411
					-29.394	-115.467	-133.085							-9.69704	-31.1181	-46.6667							-29.091	-142.085	-171.903
					-28.1819	-112.978	-129.907							-8.48492	-30.6307	-45.8498							-27.8789	-138.686	-167.394
					-26.9698	-110.451	-126.704							-7.2728	-30.1381	-45.0297							-26.6667	-135.284	-162.885
					-25.7577	-107.894	-123.48							-6.06068	-29.6412	-44.2069							-25.4546	-131.88	-158.374
					-24.5455	-105.312	-120.241							-4.84856	-29.1406	-43.382							-24.2425	-128.474	-153.863
					-23.3334	-102.711	-116.989							-3.63644	-28.6368	-42.5553							-23.0304	-125.067	-149.352
					-22.1213	-100.094	-113.727							-2.42432	-28.1304	-41.727							-21.8183	-121.659	-144.84
					-20.9092	-97.4635	-110.458							-1.2122	-27.6218	-40.8976							-20.6061	-118.249	-140.328
														-7.53403e-05	-27.1113	-40.0671

## Sheet: Supplement 1F
Normalized conductance																											V1/2a (mV)
Nav1.5	Control		Shear		Fitted curves				WT NaChBac	Control		Shear		Fitted curves				T220A NaChBac	Control		Shear		Fitted curves					Control		Shear
Voltage (mV)	Mean	SEM	Mean	SEM	Voltage (mV)	Control	Shear		Voltage (mV)	Mean	SEM	Mean	SEM	Voltage (mV)	Control	Shear		Voltage (mV)	Mean	SEM	Mean	SEM	Voltage (mV)	Control	Shear			Mean	SEM	Mean	SEM
-100	0.00166851	0.000768542	0.00258856	0.00100907	-100	0.00150684	0.00130115		-80	0.0157067	0.00595903	0.00956033	0.00245997	-79.6875	0.0196114	0.018277		-100	0.016129	0.00448854	0.0130232	0.00478569	-99.8047	0.00838933	0.00604045		Nav1.5	-59.0499	0.820359	-60.4413	0.971162
-95	0.0010878	0.000698845	0.00188993	0.000877824	-99.5312	0.00162317	0.00140793		-70	0.03766	0.0066889	0.0480044	0.0127851	-79.2188	0.0206781	0.0194306		-90	0.0396006	0.0109575	0.0456598	0.0161532	-99.375	0.00900934	0.00658245		WT NaChBac	-45.14	2.53218	-49.5727	2.08504
-90	0.0024919	0.000526854	0.00236703	0.000988035	-99.0625	0.00174847	0.00152345		-60	0.154073	0.032388	0.207484	0.0448041	-78.75	0.0218014	0.0206554		-80	0.179416	0.0425753	0.249757	0.0641397	-98.9453	0.00967473	0.00717273		T220A NaChBac	-70.7925	2.33512	-74.3551	2.13011
-85	0.00623547	0.00139532	0.00617984	0.00135613	-98.5938	0.00188343	0.00164844		-50	0.394656	0.0607544	0.499302	0.072449	-78.2812	0.0229844	0.0219557		-70	0.562769	0.107839	0.693497	0.116331	-98.5156	0.0103887	0.00781551
-80	0.0199552	0.00421666	0.0208902	0.0042227	-98.125	0.00202878	0.00178366		-40	0.658699	0.0705213	0.776435	0.0501263	-77.8125	0.0242299	0.0233359		-60	0.84136	0.066775	0.952162	0.0287467	-98.0859	0.0111548	0.0085154
-75	0.0572899	0.0110743	0.0629585	0.0115208	-97.6562	0.00218532	0.00192996		-30	0.82864	0.0527701	0.922512	0.0249922	-77.3438	0.0255411	0.0248006		-50	0.970419	0.0170418	1.00973	0.00364978	-97.6562	0.0119767	0.00927737
-70	0.141035	0.0214724	0.160132	0.024541	-97.1875	0.00235391	0.00208823		-20	0.947603	0.024979	0.993363	0.0113624	-76.875	0.0269213	0.0263549		-40	0.995301	0.00370954	0.994399	0.00376163	-97.2266	0.0128584	0.0101068
-65	0.290666	0.0280505	0.336532	0.0355246	-96.7188	0.00253547	0.00225945							-76.4062	0.0283739	0.0280037							-96.7969	0.013804	0.0110096
-60	0.48605	0.0325565	0.540432	0.0398241	-96.25	0.002731	0.00244467							-75.9375	0.0299024	0.0297525							-96.3672	0.0148182	0.011992
-55	0.657029	0.0308199	0.711086	0.03571	-95.7812	0.00294157	0.00264504							-75.4688	0.0315105	0.031607							-95.9375	0.0159056	0.0130609
-50	0.788211	0.0253048	0.832517	0.0279534	-95.3125	0.00316832	0.00286178							-75	0.0332022	0.033573							-95.5078	0.0170714	0.0142237
-45	0.886358	0.0175417	0.914552	0.0197172	-94.8438	0.00341248	0.00309623							-74.5312	0.0349813	0.0356569							-95.0781	0.018321	0.0154884
-40	0.950353	0.0121338	0.970154	0.012529	-94.375	0.0036754	0.00334982							-74.0625	0.0368522	0.0378649							-94.6484	0.0196603	0.0168635
					-93.9062	0.00395849	0.0036241							-73.5938	0.0388189	0.0402041							-94.2188	0.0210954	0.0183585
					-93.4375	0.00426329	0.00392076							-73.125	0.0408862	0.0426813							-93.7891	0.0226327	0.0199832
					-92.9688	0.00459145	0.00424159							-72.6562	0.0430585	0.0453039							-93.3594	0.0242793	0.0217485
					-92.5	0.00494475	0.00458855							-72.1875	0.0453408	0.0480796							-92.9297	0.0260424	0.0236659
					-92.0312	0.00532508	0.00496376							-71.7188	0.0477379	0.0510162							-92.5	0.0279298	0.0257479
					-91.5625	0.0057345	0.00536948							-71.25	0.0502549	0.0541219							-92.0703	0.0299498	0.0280077
					-91.0938	0.00617521	0.00580817							-70.7812	0.0528972	0.0574053							-91.6406	0.032111	0.0304595
					-90.625	0.00664955	0.00628247							-70.3125	0.0556703	0.060875							-91.2109	0.0344225	0.0331185
					-90.1562	0.00716007	0.00679523							-69.8438	0.0585795	0.0645401							-90.7812	0.0368939	0.036001
					-89.6875	0.00770948	0.00734954							-69.375	0.0616308	0.0684097							-90.3516	0.0395355	0.039124
					-89.2188	0.00830069	0.0079487							-68.9062	0.0648299	0.0724933							-89.9219	0.0423578	0.0425058
					-88.75	0.00893683	0.00859629							-68.4375	0.0681829	0.0768006							-89.4922	0.0453719	0.0461657
					-88.2812	0.00962125	0.00929613							-67.9688	0.0716958	0.0813412							-89.0625	0.0485894	0.0501239
					-87.8125	0.0103575	0.0100524							-67.5	0.0753749	0.0861252							-88.6328	0.0520225	0.054402
					-87.3438	0.0111495	0.0108695							-67.0312	0.0792264	0.0911627							-88.2031	0.0556838	0.0590221
					-86.875	0.0120014	0.0117522							-66.5625	0.0832568	0.0964636							-87.7734	0.0595863	0.0640076
					-86.4062	0.0129174	0.0127056							-66.0938	0.0874726	0.102038							-87.3438	0.0637436	0.0693828
					-85.9375	0.0139024	0.0137354							-65.625	0.0918801	0.107896							-86.9141	0.0681697	0.0751725
					-85.4688	0.0149614	0.0148473							-65.1562	0.0964859	0.114048							-86.4844	0.0728788	0.0814025
					-85	0.0160996	0.0160478							-64.6875	0.101297	0.120502							-86.0547	0.0778857	0.0880989
					-84.5312	0.017323	0.0173437							-64.2188	0.106318	0.12727							-85.625	0.0832053	0.0952882
					-84.0625	0.0186376	0.0187422							-63.75	0.111558	0.13436							-85.1953	0.0888526	0.102997
					-83.5938	0.0200499	0.0202511							-63.2812	0.117021	0.14178							-84.7656	0.0948431	0.111251
					-83.125	0.0215668	0.0218788							-62.8125	0.122715	0.149539							-84.3359	0.101192	0.120077
					-82.6562	0.0231958	0.0236341							-62.3438	0.128645	0.157644							-83.9062	0.107914	0.1295
					-82.1875	0.0249447	0.0255266							-61.875	0.134816	0.166103							-83.4766	0.115025	0.139543
					-81.7188	0.0268219	0.0275664							-61.4062	0.141236	0.174921							-83.0469	0.12254	0.150228
					-81.25	0.0288361	0.0297641							-60.9375	0.147907	0.184104							-82.6172	0.130472	0.161575
					-80.7812	0.0309967	0.0321313							-60.4688	0.154837	0.193655							-82.1875	0.138834	0.173602
					-80.3125	0.0333137	0.0346799							-60	0.162028	0.203578							-81.7578	0.147641	0.186321
					-79.8438	0.0357974	0.0374229							-59.5312	0.169486	0.213874							-81.3281	0.156903	0.199743
					-79.375	0.0384589	0.0403737							-59.0625	0.177213	0.224544							-80.8984	0.16663	0.213874
					-78.9062	0.0413099	0.0435467							-58.5938	0.185213	0.235587							-80.4688	0.176832	0.228714
					-78.4375	0.0443624	0.0469567							-58.125	0.193487	0.246999							-80.0391	0.187516	0.244257
					-77.9688	0.0476292	0.0506196							-57.6562	0.202039	0.258776							-79.6094	0.198687	0.260494
					-77.5	0.0511237	0.0545519							-57.1875	0.210868	0.270912							-79.1797	0.210349	0.277407
					-77.0312	0.0548598	0.0587706							-56.7188	0.219975	0.283399							-78.75	0.222502	0.294972
					-76.5625	0.0588519	0.0632937							-56.25	0.229359	0.296228							-78.3203	0.235144	0.313157
					-76.0938	0.0631152	0.0681396							-55.7812	0.239019	0.309386							-77.8906	0.248272	0.331926
					-75.625	0.067665	0.0733273							-55.3125	0.248953	0.322859							-77.4609	0.261878	0.351232
					-75.1562	0.0725173	0.0788765							-54.8438	0.259157	0.336633							-77.0312	0.27595	0.371025
					-74.6875	0.0776886	0.0848071							-54.375	0.269626	0.350689							-76.6016	0.290476	0.391246
					-74.2188	0.0831955	0.0911393							-53.9062	0.280356	0.365008							-76.1719	0.305438	0.411831
					-73.75	0.089055	0.0978935							-53.4375	0.291339	0.379569							-75.7422	0.320816	0.432712
					-73.2812	0.0952842	0.10509							-52.9688	0.30257	0.394349							-75.3125	0.336586	0.453816
					-72.8125	0.1019	0.11275							-52.5	0.314037	0.409324							-74.8828	0.352721	0.475065
					-72.3438	0.10892	0.120892							-52.0312	0.325734	0.424468							-74.4531	0.369191	0.496382
					-71.875	0.116361	0.129536							-51.5625	0.337647	0.439753							-74.0234	0.385962	0.517687
					-71.4062	0.124239	0.1387							-51.0938	0.349767	0.455153							-73.5938	0.402997	0.538901
					-70.9375	0.132571	0.148401							-50.625	0.362079	0.470637							-73.1641	0.42026	0.559945
					-70.4688	0.14137	0.158656							-50.1562	0.374571	0.486177							-72.7344	0.437707	0.580745
					-70	0.150653	0.169477							-49.6875	0.387227	0.501741							-72.3047	0.455297	0.601228
					-69.5312	0.16043	0.180878							-49.2188	0.400032	0.517301							-71.875	0.472986	0.621327
					-69.0625	0.170714	0.192867							-48.75	0.41297	0.532825							-71.4453	0.490728	0.640979
					-68.5938	0.181515	0.20545							-48.2812	0.426023	0.548284							-71.0156	0.508477	0.660129
					-68.125	0.192839	0.218631							-47.8125	0.439174	0.563648							-70.5859	0.526188	0.678726
					-67.6562	0.204694	0.232409							-47.3438	0.452405	0.578889							-70.1562	0.543815	0.696729
					-67.1875	0.21708	0.24678							-46.875	0.465696	0.593979							-69.7266	0.561314	0.7141
					-66.7188	0.229999	0.261736							-46.4062	0.479028	0.608891							-69.2969	0.578641	0.730812
					-66.25	0.243447	0.277263							-45.9375	0.492383	0.623599							-68.8672	0.595754	0.746842
					-65.7812	0.257417	0.293344							-45.4688	0.50574	0.638081							-68.4375	0.612615	0.762175
					-65.3125	0.271901	0.309955							-45	0.519081	0.652314							-68.0078	0.629186	0.776801
					-64.8438	0.286884	0.32707							-44.5312	0.532385	0.666276							-67.5781	0.645433	0.790719
					-64.375	0.302348	0.344656							-44.0625	0.545634	0.67995							-67.1484	0.661324	0.803929
					-63.9062	0.318274	0.362676							-43.5938	0.558808	0.693319							-66.7188	0.676832	0.816439
					-63.4375	0.334634	0.381087							-43.125	0.57189	0.706367							-66.2891	0.691932	0.828259
					-62.9688	0.351401	0.399843							-42.6562	0.584861	0.719081							-65.8594	0.706601	0.839406
					-62.5	0.368542	0.418895							-42.1875	0.597704	0.731451							-65.4297	0.720822	0.849895
					-62.0312	0.38602	0.438188							-41.7188	0.610403	0.743467							-65	0.734581	0.859749
					-61.5625	0.403795	0.457667							-41.25	0.622941	0.755121							-64.5703	0.747864	0.86899
					-61.0938	0.421824	0.477272							-40.7812	0.635304	0.766409							-64.1406	0.760665	0.877641
					-60.625	0.440062	0.496942							-40.3125	0.647478	0.777325							-63.7109	0.772977	0.885729
					-60.1562	0.458462	0.516617							-39.8438	0.659449	0.787869							-63.2812	0.784798	0.893279
					-59.6875	0.476973	0.536236							-39.375	0.671206	0.798039							-62.8516	0.796128	0.900317
					-59.2188	0.495546	0.555738							-38.9062	0.682738	0.807836							-62.4219	0.806969	0.90687
					-58.75	0.514128	0.575063							-38.4375	0.694034	0.817263							-61.9922	0.817327	0.912965
					-58.2812	0.532669	0.594156							-37.9688	0.705086	0.826322							-61.5625	0.827207	0.918628
					-57.8125	0.551117	0.612962							-37.5	0.715886	0.835018							-61.1328	0.836619	0.923883
					-57.3438	0.569423	0.631429							-37.0312	0.726428	0.843356							-60.7031	0.845572	0.928756
					-56.875	0.587537	0.649512							-36.5625	0.736705	0.851344							-60.2734	0.854077	0.933271
					-56.4062	0.605414	0.667167							-36.0938	0.746713	0.858988							-59.8438	0.862147	0.937451
					-55.9375	0.623009	0.684357							-35.625	0.756448	0.866295							-59.4141	0.869795	0.941317
					-55.4688	0.640282	0.701048							-35.1562	0.765909	0.873275							-58.9844	0.877036	0.944891
					-55	0.657195	0.717212							-34.6875	0.775092	0.879936							-58.5547	0.883882	0.948193
					-54.5312	0.673714	0.732826							-34.2188	0.783997	0.886287							-58.125	0.890351	0.951242
					-54.0625	0.689808	0.747871							-33.75	0.792625	0.892338							-57.6953	0.896456	0.954055
					-53.5938	0.705451	0.762333							-33.2812	0.800975	0.898099							-57.2656	0.902213	0.95665
					-53.125	0.720619	0.776203							-32.8125	0.80905	0.90358							-56.8359	0.907637	0.959043
					-52.6562	0.735294	0.789476							-32.3438	0.816852	0.908791							-56.4062	0.912743	0.961248
					-52.1875	0.749461	0.802151							-31.875	0.824383	0.913742							-55.9766	0.917547	0.963279
					-51.7188	0.763109	0.814231							-31.4062	0.831647	0.918442							-55.5469	0.922064	0.965149
					-51.25	0.776229	0.825722							-30.9375	0.838648	0.922903							-55.1172	0.926307	0.966871
					-50.7812	0.788818	0.836632							-30.4688	0.84539	0.927134							-54.6875	0.93029	0.968456
					-50.3125	0.800874	0.846973							-30	0.851878	0.931144							-54.2578	0.934028	0.969914
					-49.8438	0.812399	0.856759							-29.5312	0.858117	0.934943							-53.8281	0.937534	0.971255
					-49.375	0.823398	0.866005							-29.0625	0.864112	0.938541							-53.3984	0.94082	0.972488
					-48.9062	0.833878	0.874728							-28.5938	0.86987	0.941947							-52.9688	0.943899	0.973622
					-48.4375	0.843847	0.882946							-28.125	0.875396	0.945169							-52.5391	0.946782	0.974664
					-47.9688	0.853316	0.890678							-27.6562	0.880696	0.948217							-52.1094	0.949481	0.975622
					-47.5	0.862297	0.897945							-27.1875	0.885777	0.951098							-51.6797	0.952007	0.976502
					-47.0312	0.870805	0.904766							-26.7188	0.890645	0.953821							-51.25	0.954369	0.97731
					-46.5625	0.878853	0.911162							-26.25	0.895307	0.956394							-50.8203	0.956578	0.978053
					-46.0938	0.886458	0.917153							-25.7812	0.899768	0.958824							-50.3906	0.958643	0.978735
					-45.625	0.893636	0.92276							-25.3125	0.904036	0.961118							-49.9609	0.960572	0.979362
					-45.1562	0.900404	0.928002							-24.8438	0.908116	0.963283							-49.5312	0.962375	0.979937
					-44.6875	0.906778	0.9329							-24.375	0.912016	0.965327							-49.1016	0.964058	0.980465
					-44.2188	0.912776	0.937471							-23.9062	0.915742	0.967254							-48.6719	0.96563	0.98095
					-43.75	0.918415	0.941736							-23.4375	0.9193	0.969072							-48.2422	0.967098	0.981396
					-43.2812	0.923712	0.945711							-22.9688	0.922696	0.970787							-47.8125	0.968467	0.981804
					-42.8125	0.928684	0.949414							-22.5	0.925937	0.972403							-47.3828	0.969745	0.982179
					-42.3438	0.933347	0.952862							-22.0312	0.929028	0.973927							-46.9531	0.970938	0.982524
					-41.875	0.937717	0.956071							-21.5625	0.931976	0.975362							-46.5234	0.97205	0.98284
					-41.4062	0.94181	0.959055							-21.0938	0.934786	0.976715							-46.0938	0.973087	0.98313
					-40.9375	0.945642	0.961829							-20.625	0.937463	0.977989							-45.6641	0.974055	0.983396
					-40.4688	0.949227	0.964407							-20.1562	0.940014	0.979189							-45.2344	0.974957	0.98364
					-40	0.952578	0.966801																-44.8047	0.975797	0.983864
																							-44.375	0.976581	0.98407
																							-43.9453	0.977312	0.984258
																							-43.5156	0.977992	0.984431
																							-43.0859	0.978627	0.98459
																							-42.6562	0.979218	0.984736
																							-42.2266	0.979769	0.98487
																							-41.7969	0.980282	0.984992
																							-41.3672	0.98076	0.985105
																							-40.9375	0.981205	0.985208
																							-40.5078	0.981619	0.985303
																							-40.0781	0.982006	0.985389

## Sheet: Supplement 1G
Normalized steady state inactivation																											V1/2i (mV)
Nav1.5	Control		Shear		Fitted curves				WT NaChBac	Control		Shear		Fitted curves				T220A NaChBac	Control		Shear		Fitted curves					Control		Shear
Voltage (mV)	Mean	SEM	Mean	SEM	Voltage (mV)	Control	Shear		Voltage (mV)	Mean	SEM	Mean	SEM	Voltage (mV)	Control	Shear		Voltage (mV)	Mean	SEM	Mean	SEM	Voltage (mV)	Control	Shear			Mean	SEM	Mean	SEM
-130	1	0	1	0	-129.688	0.993077	0.990999		-100	0.98057	0.0107108	0.961853	0.0133265	-99.8438	0.997844	0.99575		-100	0.998416	0.00158359	0.991808	0.00560309	-99.8438	0.999375	0.994613		Nav1.5	-93.013	2.07035	-95.452	2.38402
-125	0.956906	0.00621533	0.954388	0.00659148	-129.18	0.992587	0.990352		-90	0.970339	0.0102122	0.946484	0.0162486	-99.375	0.997697	0.995455		-90	0.997813	0.00212599	0.989378	0.00771623	-99.375	0.999207	0.9943		WT NaChBac	-56.9414	2.765	-60.6857	2.0159
-120	0.93401	0.0176342	0.923898	0.0194493	-128.672	0.992062	0.989659		-80	0.931391	0.0194426	0.910331	0.0229351	-98.9062	0.997539	0.99514		-80	0.994733	0.00443494	0.981044	0.0116403	-98.9062	0.999034	0.993977		T220A NaChBac	-44.1	5.36196	-56.452	3.52966
-115	0.863749	0.019041	0.846607	0.0238714	-128.164	0.9915	0.988917		-70	0.868397	0.0332274	0.767914	0.0421925	-98.4375	0.997371	0.994804		-70	0.972057	0.00833177	0.941529	0.0143822	-98.4375	0.998856	0.993643
-110	0.790433	0.0237136	0.766915	0.0316614	-127.656	0.990898	0.988122		-60	0.628869	0.0783232	0.438708	0.0865691	-97.9688	0.997192	0.994444		-60	0.949149	0.0161137	0.889041	0.0212126	-97.9688	0.998673	0.993299
-105	0.714885	0.0294848	0.680848	0.0377559	-127.148	0.990255	0.987271		-50	0.292826	0.0792965	0.151721	0.0587107	-97.5	0.997	0.994059		-50	0.92454	0.0230758	0.857233	0.0256888	-97.5	0.998484	0.992944
-100	0.633336	0.0352094	0.59071	0.0451723	-126.641	0.989566	0.98636		-40	0.0832178	0.0342867	0.0427992	0.0173715	-97.0312	0.996796	0.993648		-40	0.902031	0.0267756	0.832736	0.0300178	-97.0312	0.998291	0.992577
-95	0.546051	0.0405049	0.499884	0.0497161	-126.133	0.98883	0.985384		-30	0.0208181	0.00951883	0.0146277	0.00717703	-96.5625	0.996577	0.993209		-30	0.880374	0.0303926	0.810744	0.0351252	-96.5625	0.998092	0.992199
-90	0.45449	0.0435326	0.406662	0.0518571	-125.625	0.988042	0.98434		-20	0.00290037	0.00160513	0.00807933	0.00501525	-96.0938	0.996344	0.992739		-20	0.865399	0.0308134	0.786669	0.0395396	-96.0938	0.997888	0.991808
-85	0.356461	0.0442178	0.312345	0.0496289	-125.117	0.987199	0.983223		-10	0.00221011	0.00170954	6.28525e-05	6.28525e-05	-95.625	0.996094	0.992237		-10	0.850312	0.0333314	0.781508	0.0422542	-95.625	0.997678	0.991406
-80	0.257255	0.0398479	0.216464	0.0423016	-124.609	0.986298	0.982027		0	0	0	0.000120654	7.85777e-05	-95.1562	0.995828	0.991701		0	0.841334	0.0360898	0.7732	0.0445943	-95.1562	0.997462	0.990991
-75	0.158594	0.0292788	0.123439	0.0286434	-124.102	0.985334	0.980747							-94.6875	0.995544	0.991128							-94.6875	0.997241	0.990562
-70	0.0775738	0.0156986	0.0544426	0.0134794	-123.594	0.984303	0.979379							-94.2188	0.99524	0.990516							-94.2188	0.997013	0.990121
-65	0.030741	0.00639745	0.0183653	0.00381755	-123.086	0.983201	0.977915							-93.75	0.994916	0.989862							-93.75	0.996779	0.989666
-60	0.0122004	0.0026375	0.00718323	0.00118979	-122.578	0.982024	0.97635							-93.2812	0.99457	0.989164							-93.2812	0.996539	0.989196
-55	0.00533864	0.00129296	0.00349797	0.000660462	-122.07	0.980765	0.974677							-92.8125	0.9942	0.988418							-92.8125	0.996292	0.988713
-50	0.00237157	0.000595478	0.00202447	0.000631197	-121.562	0.97942	0.972889							-92.3438	0.993805	0.987621							-92.3438	0.996038	0.988214
-45	0.00145616	0.000520741	0.0016127	0.000900689	-121.055	0.977983	0.970979							-91.875	0.993384	0.986771							-91.875	0.995778	0.9877
-40	0.000955747	0.000419163	0.00121087	0.000688194	-120.547	0.976448	0.968938							-91.4062	0.992934	0.985862							-91.4062	0.99551	0.987171
					-120.039	0.974809	0.966758							-90.9375	0.992454	0.984893							-90.9375	0.995235	0.986626
					-119.531	0.973059	0.964431							-90.4688	0.991942	0.983857							-90.4688	0.994954	0.986065
					-119.023	0.971191	0.961948							-90	0.991395	0.982752							-90	0.994664	0.985486
					-118.516	0.969198	0.959299							-89.5312	0.990811	0.981573							-89.5312	0.994367	0.984891
					-118.008	0.967071	0.956473							-89.0625	0.990189	0.980315							-89.0625	0.994062	0.984278
					-117.5	0.964803	0.953461							-88.5938	0.989524	0.978973							-88.5938	0.993749	0.983648
					-116.992	0.962385	0.950251							-88.125	0.988815	0.977541							-88.125	0.993428	0.982999
					-116.484	0.959807	0.946832							-87.6562	0.988058	0.976015							-87.6562	0.993098	0.982331
					-115.977	0.957061	0.943193							-87.1875	0.987251	0.974387							-87.1875	0.99276	0.981645
					-115.469	0.954136	0.93932							-86.7188	0.98639	0.972652							-86.7188	0.992413	0.980939
					-114.961	0.951022	0.935201							-86.25	0.985472	0.970803							-86.25	0.992057	0.980213
					-114.453	0.947708	0.930824							-85.7812	0.984493	0.968833							-85.7812	0.991692	0.979466
					-113.945	0.944183	0.926173							-85.3125	0.983449	0.966734							-85.3125	0.991318	0.978699
					-113.438	0.940436	0.921237							-84.8438	0.982336	0.9645							-84.8438	0.990935	0.977911
					-112.93	0.936454	0.916001							-84.375	0.981149	0.962121							-84.375	0.990541	0.977102
					-112.422	0.932224	0.91045							-83.9062	0.979885	0.959589							-83.9062	0.990138	0.976271
					-111.914	0.927735	0.904571							-83.4375	0.978538	0.956896							-83.4375	0.989725	0.975417
					-111.406	0.922974	0.898349							-82.9688	0.977102	0.954032							-82.9688	0.989302	0.974541
					-110.898	0.917926	0.89177							-82.5	0.975573	0.950987							-82.5	0.988868	0.973642
					-110.391	0.912578	0.884819							-82.0312	0.973944	0.947752							-82.0312	0.988424	0.97272
					-109.883	0.906918	0.877484							-81.5625	0.97221	0.944316							-81.5625	0.987969	0.971775
					-109.375	0.900931	0.86975							-81.0938	0.970364	0.940668							-81.0938	0.987503	0.970805
					-108.867	0.894604	0.861604							-80.625	0.968399	0.936797							-80.625	0.987026	0.969811
					-108.359	0.887922	0.853036							-80.1562	0.966309	0.932691							-80.1562	0.986537	0.968793
					-107.852	0.880874	0.844033							-79.6875	0.964085	0.928339							-79.6875	0.986037	0.96775
					-107.344	0.873446	0.834586							-79.2188	0.96172	0.923729							-79.2188	0.985526	0.966681
					-106.836	0.865625	0.824685							-78.75	0.959207	0.918848							-78.75	0.985002	0.965588
					-106.328	0.857399	0.814323							-78.2812	0.956536	0.913683							-78.2812	0.984466	0.964469
					-105.82	0.848758	0.803495							-77.8125	0.953698	0.908223							-77.8125	0.983919	0.963324
					-105.312	0.839692	0.792196							-77.3438	0.950684	0.902455							-77.3438	0.983358	0.962153
					-104.805	0.83019	0.780426							-76.875	0.947486	0.896365							-76.875	0.982786	0.960956
					-104.297	0.820246	0.768184							-76.4062	0.944092	0.889942							-76.4062	0.9822	0.959733
					-103.789	0.809853	0.755473							-75.9375	0.940492	0.883172							-75.9375	0.981602	0.958483
					-103.281	0.799007	0.742299							-75.4688	0.936676	0.876044							-75.4688	0.98099	0.957207
					-102.773	0.787703	0.72867							-75	0.932633	0.868546							-75	0.980366	0.955905
					-102.266	0.775943	0.714597							-74.5312	0.928352	0.860666							-74.5312	0.979728	0.954576
					-101.758	0.763726	0.700095							-74.0625	0.923821	0.852394							-74.0625	0.979077	0.95322
					-101.25	0.751057	0.685181							-73.5938	0.919028	0.84372							-73.5938	0.978412	0.951838
					-100.742	0.737942	0.669875							-73.125	0.913962	0.834636							-73.125	0.977733	0.95043
					-100.234	0.724389	0.6542							-72.6562	0.90861	0.825132							-72.6562	0.977041	0.948995
					-99.7266	0.710411	0.638183							-72.1875	0.902961	0.815204							-72.1875	0.976335	0.947535
					-99.2188	0.696021	0.621853							-71.7188	0.897002	0.804845							-71.7188	0.975614	0.946048
					-98.7109	0.681237	0.605242							-71.25	0.890721	0.794053							-71.25	0.97488	0.944536
					-98.2031	0.666078	0.588384							-70.7812	0.884108	0.782824							-70.7812	0.974131	0.942998
					-97.6953	0.650569	0.571316							-70.3125	0.877148	0.77116							-70.3125	0.973368	0.941435
					-97.1875	0.634734	0.554077							-69.8438	0.869833	0.759062							-69.8438	0.972591	0.939847
					-96.6797	0.618603	0.536706							-69.375	0.86215	0.746534							-69.375	0.971799	0.938234
					-96.1719	0.602205	0.519246							-68.9062	0.854091	0.733584							-68.9062	0.970993	0.936598
					-95.6641	0.585575	0.501739							-68.4375	0.845644	0.72022							-68.4375	0.970173	0.934938
					-95.1562	0.568748	0.484228							-67.9688	0.836801	0.706454							-67.9688	0.969337	0.933255
					-94.6484	0.55176	0.466755							-67.5	0.827556	0.692301							-67.5	0.968488	0.931549
					-94.1406	0.53465	0.449364							-67.0312	0.8179	0.677776							-67.0312	0.967624	0.929822
					-93.6328	0.517459	0.432095							-66.5625	0.80783	0.662899							-66.5625	0.966746	0.928073
					-93.125	0.500226	0.41499							-66.0938	0.79734	0.647692							-66.0938	0.965853	0.926304
					-92.6172	0.482993	0.398087							-65.625	0.78643	0.63218							-65.625	0.964946	0.924515
					-92.1094	0.4658	0.381424							-65.1562	0.775097	0.61639							-65.1562	0.964024	0.922707
					-91.6016	0.448688	0.365036							-64.6875	0.763345	0.60035							-64.6875	0.963088	0.920881
					-91.0938	0.431696	0.348954							-64.2188	0.751175	0.584092							-64.2188	0.962139	0.919037
					-90.5859	0.414864	0.333209							-63.75	0.738594	0.567649							-63.75	0.961175	0.917176
					-90.0781	0.398228	0.317828							-63.2812	0.725609	0.551056							-63.2812	0.960197	0.9153
					-89.5703	0.381824	0.302834							-62.8125	0.71223	0.534348							-62.8125	0.959206	0.913409
					-89.0625	0.365685	0.288249							-62.3438	0.69847	0.517563							-62.3438	0.958201	0.911504
					-88.5547	0.349843	0.27409							-61.875	0.684344	0.500738							-61.875	0.957182	0.909587
					-88.0469	0.334324	0.260372							-61.4062	0.669869	0.483911							-61.4062	0.956151	0.907658
					-87.5391	0.319157	0.247107							-60.9375	0.655064	0.467121							-60.9375	0.955106	0.905718
					-87.0312	0.304362	0.234303							-60.4688	0.639953	0.450404							-60.4688	0.954049	0.903768
					-86.5234	0.289962	0.221968							-60	0.624559	0.4338							-60	0.952979	0.90181
					-86.0156	0.275972	0.210103							-59.5312	0.608909	0.417342							-59.5312	0.951897	0.899845
					-85.5078	0.262408	0.198711							-59.0625	0.593031	0.401066							-59.0625	0.950803	0.897874
					-85	0.249281	0.18779							-58.5938	0.576957	0.385006							-58.5938	0.949697	0.895898
					-84.4922	0.236601	0.177336							-58.125	0.560719	0.369193							-58.125	0.94858	0.893918
					-83.9844	0.224372	0.167344							-57.6562	0.544349	0.353655							-57.6562	0.947452	0.891935
					-83.4766	0.212599	0.157807							-57.1875	0.527883	0.338421							-57.1875	0.946313	0.889951
					-82.9688	0.201284	0.148717							-56.7188	0.511356	0.323514							-56.7188	0.945164	0.887966
					-82.4609	0.190426	0.140063							-56.25	0.494804	0.308958							-56.25	0.944005	0.885983
					-81.9531	0.180021	0.131835							-55.7812	0.478263	0.294771							-55.7812	0.942836	0.884001
					-81.4453	0.170065	0.12402							-55.3125	0.46177	0.28097							-55.3125	0.941658	0.882023
					-80.9375	0.160552	0.116607							-54.8438	0.445361	0.267571							-54.8438	0.940472	0.88005
					-80.4297	0.151474	0.109581							-54.375	0.429069	0.254584							-54.375	0.939277	0.878082
					-79.9219	0.142822	0.102929							-53.9062	0.41293	0.242019							-53.9062	0.938074	0.876121
					-79.4141	0.134586	0.0966369							-53.4375	0.396976	0.229883							-53.4375	0.936864	0.874168
					-78.9062	0.126755	0.0906907							-52.9688	0.381238	0.218181							-52.9688	0.935647	0.872224
					-78.3984	0.119316	0.085076							-52.5	0.365745	0.206914							-52.5	0.934424	0.87029
					-77.8906	0.112258	0.0797783							-52.0312	0.350525	0.196083							-52.0312	0.933195	0.868368
					-77.3828	0.105567	0.0747836							-51.5625	0.335604	0.185686							-51.5625	0.93196	0.866457
					-76.875	0.0992306	0.0700778							-51.0938	0.321004	0.17572							-51.0938	0.930721	0.864561
					-76.3672	0.0932348	0.0656471							-50.625	0.306745	0.16618							-50.625	0.929477	0.862678
					-75.8594	0.0875661	0.061478							-50.1562	0.292847	0.157059							-50.1562	0.928229	0.860811
					-75.3516	0.0822108	0.0575573							-49.6875	0.279325	0.14835							-49.6875	0.926978	0.85896
					-74.8438	0.0771553	0.0538723							-49.2188	0.266192	0.140043							-49.2188	0.925725	0.857126
					-74.3359	0.0723861	0.0504107							-48.75	0.25346	0.13213							-48.75	0.924469	0.85531
					-73.8281	0.0678901	0.0471604							-48.2812	0.241136	0.124598							-48.2812	0.923211	0.853513
					-73.3203	0.0636542	0.0441099							-47.8125	0.229228	0.117438							-47.8125	0.921953	0.851735
					-72.8125	0.0596656	0.0412482							-47.3438	0.217739	0.110637							-47.3438	0.920694	0.849978
					-72.3047	0.0559121	0.0385646							-46.875	0.206671	0.104184							-46.875	0.919435	0.848241
					-71.7969	0.0523815	0.0360491							-46.4062	0.196025	0.0980656							-46.4062	0.918177	0.846527
					-71.2891	0.0490623	0.0336919							-45.9375	0.185799	0.0922695							-45.9375	0.91692	0.844834
					-70.7812	0.0459432	0.0314838							-45.4688	0.17599	0.086783							-45.4688	0.915664	0.843165
					-70.2734	0.0430134	0.0294161							-45	0.166592	0.0815934							-45	0.914411	0.841518
					-69.7656	0.0402626	0.0274802							-44.5312	0.157601	0.0766881							-44.5312	0.913161	0.839896
					-69.2578	0.0376808	0.0256684							-44.0625	0.149008	0.0720546							-44.0625	0.911914	0.838298
					-68.75	0.0352584	0.0239732							-43.5938	0.140805	0.0676805							-43.5938	0.910672	0.836724
					-68.2422	0.0329864	0.0223873							-43.125	0.132983	0.0635537							-43.125	0.909433	0.835175
					-67.7344	0.0308562	0.020904							-42.6562	0.125532	0.0596625							-42.6562	0.9082	0.833652
					-67.2266	0.0288594	0.0195171							-42.1875	0.118442	0.0559952							-42.1875	0.906972	0.832155
					-66.7188	0.0269882	0.0182205							-41.7188	0.111701	0.0525408							-41.7188	0.90575	0.830683
					-66.2109	0.0252352	0.0170085							-41.25	0.105297	0.0492884							-41.25	0.904535	0.829237
					-65.7031	0.0235934	0.0158758							-40.7812	0.0992202	0.0462274							-40.7812	0.903327	0.827818
					-65.1953	0.0220559	0.0148175							-40.3125	0.0934571	0.0433479							-40.3125	0.902126	0.826425
					-64.6875	0.0206165	0.0138287							-39.8438	0.0879961	0.0406402							-39.8438	0.900933	0.825058
					-64.1797	0.0192691	0.012905							-39.375	0.0828251	0.0380948							-39.375	0.899748	0.823718
					-63.6719	0.0180083	0.0120423							-38.9062	0.0779319	0.0357029							-38.9062	0.898573	0.822405
					-63.1641	0.0168285	0.0112365							-38.4375	0.0733047	0.033456							-38.4375	0.897406	0.821118
					-62.6562	0.0157247	0.0104842							-37.9688	0.0689317	0.0313459							-37.9688	0.896249	0.819857
					-62.1484	0.0146923	0.00978165							-37.5	0.0648014	0.0293648							-37.5	0.895103	0.818623
					-61.6406	0.0137267	0.00912579							-37.0312	0.0609023	0.0275054							-37.0312	0.893966	0.817415
					-61.1328	0.0128237	0.00851352							-36.5625	0.0572235	0.0257606							-36.5625	0.892841	0.816233
					-60.625	0.0119795	0.007942							-36.0938	0.0537542	0.0241237							-36.0938	0.891726	0.815077
					-60.1172	0.0111901	0.00740856							-35.625	0.0504839	0.0225884							-35.625	0.890623	0.813948
					-59.6094	0.0104523	0.00691071							-35.1562	0.0474027	0.0211488							-35.1562	0.889532	0.812843
					-59.1016	0.00976257	0.00644609							-34.6875	0.0445007	0.019799							-34.6875	0.888453	0.811764
					-58.5938	0.00911797	0.00601252							-34.2188	0.0417686	0.0185337							-34.2188	0.887386	0.810711
					-58.0859	0.00851556	0.00560794							-33.75	0.0391973	0.0173479							-33.75	0.886332	0.809682
					-57.5781	0.00795263	0.00523045							-33.2812	0.0367782	0.0162366							-33.2812	0.88529	0.808678
					-57.0703	0.00742664	0.00487824							-32.8125	0.0345031	0.0151955							-32.8125	0.884262	0.807698
					-56.5625	0.00693519	0.00454964							-32.3438	0.032364	0.0142202							-32.3438	0.883247	0.806742
					-56.0547	0.00647605	0.00424308							-31.875	0.0303533	0.0133066							-31.875	0.882245	0.80581
					-55.5469	0.00604713	0.0039571							-31.4062	0.0284639	0.0124509							-31.4062	0.881257	0.804902
					-55.0391	0.00564645	0.00369032							-30.9375	0.0266888	0.0116497							-30.9375	0.880282	0.804016
					-54.5312	0.00527218	0.00344146							-30.4688	0.0250216	0.0108994							-30.4688	0.879322	0.803153
					-54.0234	0.00492259	0.00320933							-30	0.0234561	0.010197							-30	0.878376	0.802313
					-53.5156	0.00459608	0.00299281							-29.5312	0.0219862	0.00953934							-29.5312	0.877443	0.801494
					-53.0078	0.00429113	0.00279086							-29.0625	0.0206066	0.00892375							-29.0625	0.876525	0.800697
					-52.5	0.00400634	0.0026025							-28.5938	0.0193118	0.00834756							-28.5938	0.875621	0.799922
					-51.9922	0.00374037	0.00242682							-28.125	0.0180968	0.00780827							-28.125	0.874732	0.799167
					-51.4844	0.003492	0.00226298							-27.6562	0.016957	0.00730357							-27.6562	0.873857	0.798432
					-50.9766	0.00326006	0.00211017							-27.1875	0.0158878	0.00683127							-27.1875	0.872997	0.797718
					-50.4688	0.00304349	0.00196766							-26.7188	0.014885	0.00638931							-26.7188	0.872151	0.797023
					-49.9609	0.00284126	0.00183475							-26.25	0.0139446	0.00597577							-26.25	0.871319	0.796348
					-49.4531	0.00265243	0.00171081							-25.7812	0.0130628	0.00558885							-25.7812	0.870502	0.795691
					-48.9453	0.00247612	0.00159523							-25.3125	0.0122361	0.00522685							-25.3125	0.869699	0.795053
					-48.4375	0.00231151	0.00148745							-24.8438	0.0114611	0.00488818							-24.8438	0.868911	0.794433
					-47.9297	0.00215781	0.00138693							-24.375	0.0107347	0.00457135							-24.375	0.868137	0.79383
					-47.4219	0.00201431	0.0012932							-23.9062	0.0100538	0.00427497							-23.9062	0.867378	0.793245
					-46.9141	0.00188034	0.0012058							-23.4375	0.00941569	0.00399773							-23.4375	0.866632	0.792676
					-46.4062	0.00175526	0.0011243							-22.9688	0.00881773	0.0037384							-22.9688	0.865901	0.792124
					-45.8984	0.00163849	0.0010483							-22.5	0.00825743	0.00349584							-22.5	0.865184	0.791589
					-45.3906	0.00152948	0.000977431							-22.0312	0.00773246	0.00326896							-22.0312	0.864481	0.791068
					-44.8828	0.00142771	0.000911351							-21.5625	0.00724062	0.00305676							-21.5625	0.863792	0.790564
					-44.375	0.0013327	0.000849734							-21.0938	0.00677984	0.0028583							-21.0938	0.863117	0.790074
					-43.8672	0.001244	0.00079228							-20.625	0.00634821	0.00267268							-20.625	0.862455	0.789598
					-43.3594	0.0011612	0.000738707							-20.1562	0.00594389	0.00249909							-20.1562	0.861807	0.789137
					-42.8516	0.00108391	0.000688755							-19.6875	0.00556517	0.00233675							-19.6875	0.861172	0.78869
					-42.3438	0.00101176	0.000642178							-19.2188	0.00521046	0.00218493							-19.2188	0.860551	0.788256
					-41.8359	0.0009444	0.000598749							-18.75	0.00487825	0.00204296							-18.75	0.859943	0.787836
					-41.3281	0.000881525	0.000558256							-18.2812	0.00456712	0.00191019							-18.2812	0.859348	0.787428
					-40.8203	0.000822832	0.000520499							-17.8125	0.00427575	0.00178604							-17.8125	0.858765	0.787032
					-40.3125	0.000768044	0.000485295							-17.3438	0.00400289	0.00166994							-17.3438	0.858196	0.786649
														-16.875	0.00374738	0.00156137							-16.875	0.857638	0.786278
														-16.4062	0.00350812	0.00145986							-16.4062	0.857093	0.785918
														-15.9375	0.00328409	0.00136493							-15.9375	0.856561	0.785569
														-15.4688	0.00307432	0.00127617							-15.4688	0.85604	0.785231
														-15	0.00287791	0.00119318							-15	0.855531	0.784903
														-14.5312	0.00269402	0.00111557							-14.5312	0.855034	0.784586
														-14.0625	0.00252184	0.00104301							-14.0625	0.854548	0.784279
														-13.5938	0.00236065	0.000975164							-13.5938	0.854074	0.783981
														-13.125	0.00220973	0.000911726							-13.125	0.85361	0.783693
														-12.6562	0.00206844	0.000852412							-12.6562	0.853158	0.783414
														-12.1875	0.00193617	0.000796954							-12.1875	0.852716	0.783144
														-11.7188	0.00181234	0.000745101							-11.7188	0.852285	0.782882
														-11.25	0.00169642	0.00069662							-11.25	0.851864	0.782629
														-10.7812	0.0015879	0.000651291							-10.7812	0.851453	0.782383
														-10.3125	0.00148631	0.000608909							-10.3125	0.851053	0.782146
														-9.84375	0.00139121	0.000569284							-9.84375	0.850662	0.781916
														-9.375	0.00130219	0.000532237							-9.375	0.85028	0.781694
														-8.90625	0.00121886	0.000497599							-8.90625	0.849908	0.781479
														-8.4375	0.00114086	0.000465214							-8.4375	0.849546	0.78127
														-7.96875	0.00106784	0.000434936							-7.96875	0.849192	0.781069
														-7.5	0.000999488	0.000406628							-7.5	0.848847	0.780874
														-7.03125	0.00093551	0.000380161							-7.03125	0.848511	0.780685
														-6.5625	0.000875623	0.000355417							-6.5625	0.848184	0.780503
														-6.09375	0.000819566	0.000332283							-6.09375	0.847865	0.780326
														-5.625	0.000767096	0.000310654							-5.625	0.847554	0.780155
														-5.15625	0.000717982	0.000290432							-5.15625	0.84725	0.77999
														-4.6875	0.000672011	0.000271527							-4.6875	0.846955	0.77983
														-4.21875	0.000628981	0.000253851							-4.21875	0.846667	0.779675
														-3.75	0.000588705	0.000237326							-3.75	0.846387	0.779526
														-3.28125	0.000551007	0.000221877							-3.28125	0.846114	0.779381
														-2.8125	0.000515721	0.000207433							-2.8125	0.845849	0.779241
														-2.34375	0.000482694	0.000193929							-2.34375	0.84559	0.779106
														-1.875	0.000451781	0.000181304							-1.875	0.845338	0.778975
														-1.40625	0.000422847	0.000169501							-1.40625	0.845092	0.778849
														-0.9375	0.000395765	0.000158466							-0.9375	0.844854	0.778726
														-0.46875	0.000370417	0.00014815							-0.46875	0.844621	0.778608
														0	0.000346692	0.000138505							0	0.844395	0.778494
