# Supplementary material for: Mechanosensitive pore opening of a prokaryotic voltage-gated sodium channel
Source: eLife. 2023 Mar 13;12:e79271. doi: 10.7554/eLife.79271 (PMC10038658; doi:10.7554/eLife.79271)
Supplement: Figure 2—source data 1. [file elife-79271-fig2-data1.xlsx]

## Sheet: Figure 2B
All-sample probability of T220A NaChBac per voltage
-80 mV			Fitted curves (-80 mV)				-60 mV			Fitted curves (-60 mV)				-20 mV			Fitted curves (-20 mV)
Current (pA)	Control (0 mmHg)	Pressure (-10 mmHg)	Current (pA)	Control (0 mmHg)	Pressure (-10 mmHg)		Current (pA)	Control (0 mmHg)	Pressure (-10 mmHg)	Current (pA)	Control (0 mmHg)	Pressure (-10 mmHg)		Current (pA)	Control (0 mmHg)	Pressure (-10 mmHg)	Current (pA)	Control (0 mmHg)	Pressure (-10 mmHg)
-0.45	0	0	-0.475	0.00374514	0.00398326		-0.45	0	0	-0.475	0.00333946	0.00163673		-0.45	0	0	-0.45	-0.000534535	4.64548e-05
-0.35	0.00158333	0.00308179	-0.454798	0.00402353	0.00416451		-0.35	0.000749625	0	-0.454798	0.00337325	0.00171676		-0.35	0	0	-0.429798	-0.000534264	4.64602e-05
-0.25	0.0180833	0.0324838	-0.434596	0.00447116	0.00448904		-0.25	0.00882892	0.00541396	-0.434596	0.00344328	0.00184764		-0.25	0.000195554	0.000152098	-0.409596	-0.000533466	4.64791e-05
-0.15	0.101083	0.126853	-0.414394	0.00517364	0.00505187		-0.15	0.0925371	0.0302349	-0.414394	0.00358299	0.00205626		-0.15	0.00869131	0.0023032	-0.389394	-0.000531237	4.65412e-05
-0.05	0.241167	0.311011	-0.394192	0.00624933	0.0059971		-0.05	0.257205	0.0776278	-0.394192	0.00385134	0.00238025		-0.05	0.103839	0.0242705	-0.369192	-0.000525325	4.67349e-05
0.05	0.269667	0.275029	-0.37399	0.00785625	0.00753384		0.05	0.269615	0.0797934	-0.37399	0.00434742	0.00287039		0.05	0.132651	0.0676618	-0.34899	-0.000510435	4.7308e-05
0.15	0.192583	0.137265	-0.353788	0.0101975	0.00995172		0.15	0.117608	0.0489755	-0.353788	0.00522975	0.0035925		0.15	0.0638594	0.0443908	-0.328788	-0.000474848	4.89138e-05
0.25	0.0904167	0.0640513	-0.333586	0.0135237	0.0136319		0.25	0.051974	0.0260703	-0.333586	0.00673909	0.00462824		0.25	0.0668144	0.0748973	-0.308586	-0.000394144	5.31757e-05
0.35	0.0318333	0.0291521	-0.313384	0.0181294	0.0190482		0.35	0.0198234	0.0182409	-0.313384	0.00922132	0.00607398		0.35	0.245442	0.287443	-0.288384	-0.000220559	6.38869e-05
0.45	0.0131667	0.0133267	-0.293182	0.0243435	0.0267516		0.45	0.0129935	0.0239047	-0.293182	0.0131439	0.00803708		0.45	0.286009	0.371314	-0.268182	0.000133413	8.93704e-05
0.55	0.00866667	0.00424788	-0.27298	0.0325082	0.0373323		0.55	0.0144095	0.0553057	-0.27298	0.0190964	0.0106287		0.55	0.0853052	0.115833	-0.24798	0.000817379	0.000146746
0.65	0.007	0.00216558	-0.252778	0.0429496	0.0513546		0.65	0.027403	0.132434	-0.252778	0.0277639	0.0139529		0.65	0.00719206	0.0106251	-0.227778	0.00206889	0.000268937
0.75	0.00575	0.000666334	-0.232576	0.0559367	0.0692659		0.75	0.0437281	0.181992	-0.232576	0.0398624	0.0180925		0.75	0	0.000869131	-0.207576	0.00423571	0.00051497
0.85	0.004	0.000166583	-0.212374	0.0716337	0.0912861		0.85	0.043395	0.178494	-0.212374	0.056031	0.0230921		0.85	0	0.000239011	-0.187374	0.00778201	0.000983039
0.95	0.0025	0.000333167	-0.192172	0.0900493	0.117293		0.95	0.0244045	0.0941196	-0.192172	0.0766853	0.0289407		0.95	0	0	-0.167172	0.0132615	0.00182378
1.05	0.00525	0.000166583	-0.17197	0.110989	0.146725		1.05	0.0114943	0.0326503	-0.17197	0.10185	0.0355563		1.05	0	0	-0.14697	0.0212413	0.00324816
1.15	0.0045	0	-0.151768	0.134023	0.178526		1.15	0.00383142	0.0108279	-0.151768	0.131005	0.0427753		1.15	0	0	-0.126768	0.0321698	0.00552155
1.25	0.001	0	-0.131566	0.158466	0.211157		1.25	0	0.00316508	-0.131566	0.162983	0.0503505		1.25	0	0	-0.106566	0.0462008	0.00893435
1.35	0.00116667	0	-0.111364	0.183397	0.242687		1.35	0	0.000749625	-0.111364	0.195968	0.0579583		1.35	0	0	-0.0863637	0.0630128	0.0137427
1.45	0.000583333	0	-0.0911618	0.207699	0.270965		1.45	0	0	-0.0911618	0.227614	0.0652182		1.45	0	0	-0.0661617	0.0816821	0.0200821
1.55	0	0	-0.0709598	0.230137	0.293855		1.55	0	0	-0.0709598	0.255301	0.0717223		1.55	0	0	-0.0459596	0.100678	0.0278692
			-0.0507577	0.249457	0.3095					-0.0507577	0.276478	0.077072					-0.0257576	0.11802	0.0367237
			-0.0305557	0.264498	0.316569					-0.0305557	0.289049	0.0809181					-0.0055556	0.131601	0.0459447
			-0.0103537	0.274311	0.314447					-0.0103537	0.291718	0.0829987					0.0146464	0.139601	0.0545735
			0.00984831	0.278258	0.303319					0.00984831	0.284203	0.0831685					0.0348484	0.140888	0.0615463
			0.0300503	0.276075	0.284146					0.0300503	0.26729	0.0814157					0.0550505	0.135298	0.0659127
			0.0502523	0.267908	0.258529					0.0502523	0.242696	0.0778633					0.0752525	0.12368	0.0670633
			0.0704544	0.254293	0.228486					0.0704544	0.212781	0.0727552					0.0954545	0.107731	0.0649045
			0.0906564	0.236099	0.196192					0.0906564	0.180177	0.0664284					0.115657	0.0896659	0.0599333
			0.110858	0.214436	0.163723					0.110858	0.147413	0.0592769					0.135859	0.0718428	0.0532057
			0.13106	0.190543	0.132846					0.13106	0.116603	0.0517119					0.156061	0.0564653	0.0462297
			0.151262	0.165672	0.104886					0.151262	0.0892627	0.0441242					0.176263	0.0454297	0.0408354
			0.171464	0.140983	0.0806674					0.171464	0.0662419	0.036854					0.196465	0.0403133	0.0390618
			0.191666	0.117461	0.0605412					0.191666	0.0477856	0.0301708					0.216667	0.0424313	0.043056
			0.211868	0.0958602	0.0444587					0.211868	0.033664	0.024265					0.236869	0.0528513	0.0549309
			0.23207	0.0766847	0.032081					0.23207	0.0233388	0.0192502					0.257071	0.0722671	0.0764999
			0.252272	0.0601942	0.0228944					0.252272	0.0161247	0.0151748					0.277273	0.100702	0.108841
			0.272474	0.0464343	0.0163129					0.272474	0.0113187	0.0120397					0.297475	0.137112	0.151723
			0.292677	0.0352807	0.0117579					0.292677	0.00828798	0.00981806					0.317677	0.179047	0.203061
			0.312879	0.0264893	0.00871043					0.312879	0.00651562	0.00847611					0.337879	0.222581	0.258647
			0.333081	0.0197462	0.00673861					0.333081	0.0056131	0.00799076					0.358081	0.262666	0.312408
			0.353283	0.0147102	0.00550414					0.353283	0.00531108	0.00836347					0.378283	0.293937	0.357299
			0.373485	0.011046	0.00475609					0.373485	0.00543876	0.009629					0.398485	0.311793	0.386703
			0.393687	0.00844773	0.0043172					0.393687	0.00589993	0.0118584					0.418687	0.313455	0.395966
			0.413889	0.00665138	0.00406782					0.413889	0.00665048	0.0151563					0.438889	0.298645	0.383556
			0.434091	0.00544021	0.00393056					0.434091	0.00767944	0.019652					0.459091	0.269642	0.351458
			0.454293	0.00464359	0.00385737					0.454293	0.00899414	0.0254856					0.479293	0.230704	0.30464
			0.474495	0.00413236	0.00381954					0.474495	0.0106087	0.0327889					0.499495	0.187037	0.249786
			0.494697	0.00381218	0.0038006					0.494697	0.012535	0.0416624					0.519697	0.143666	0.193739
			0.514899	0.00361646	0.0037914					0.514899	0.014776	0.0521504					0.539899	0.104531	0.142149
			0.535101	0.00349966	0.00378707					0.535101	0.0173199	0.0642168					0.560101	0.072017	0.0986623
			0.555303	0.00343161	0.0037851					0.555303	0.0201361	0.0777232					0.580303	0.0469472	0.0647834
			0.575505	0.00339289	0.00378422					0.575505	0.0231728	0.0924144					0.600505	0.0289164	0.0402457
			0.595707	0.00337138	0.00378385					0.595707	0.0263564	0.107913					0.620707	0.0167781	0.023659
			0.615909	0.00335971	0.00378369					0.615909	0.0295926	0.123723					0.640909	0.00911087	0.0131662
			0.636111	0.00335352	0.00378363					0.636111	0.0327701	0.139256					0.661111	0.0045584	0.00694204
			0.656313	0.00335032	0.0037836					0.656313	0.0357665	0.153857					0.681313	0.00201407	0.00347472
			0.676515	0.0033487	0.00378359					0.676515	0.0384556	0.166849					0.701515	0.000674164	0.00165872
			0.696717	0.0033479	0.00378359					0.696717	0.0407159	0.17759					0.721717	8.70896e-06	0.000763686
			0.716919	0.00334752	0.00378359					0.716919	0.0424401	0.185516					0.741919	0	0.000348269
			0.737121	0.00334734	0.00378359					0.737121	0.043543	0.190198					0.762121	0	0.000166592
			0.757323	0.00334725	0.00378359					0.757323	0.0439688	0.191376					0.782323	0	9.1689e-05
			0.777525	0.00334721	0.00378359					0.777525	0.0436957	0.188982					0.802525	0	6.25647e-05
			0.797727	0.0033472	0.00378359					0.797727	0.0427376	0.183152					0.822727	0	5.18812e-05
			0.817929	0.00334719	0.00378359					0.817929	0.0411434	0.174207					0.842929	0	4.81828e-05
			0.838131	0.00334719	0.00378359					0.838131	0.0389921	0.162628					0.863132	0	4.69744e-05
			0.858333	0.00334719	0.00378359					0.858333	0.0363871	0.14901					0.883334	0	4.66015e-05
			0.878535	0.00334719	0.00378359					0.878535	0.0334473	0.134015					0.903536	0	4.64929e-05
			0.898737	0.00334719	0.00378359					0.898737	0.0302987	0.118315					0.923738	0	4.64631e-05
			0.918939	0.00334719	0.00378359					0.918939	0.0270654	0.102547					0.94394	0	4.64553e-05
			0.939142	0.00334719	0.00378359					0.939142	0.0238615	0.0872711					0.964142	0	4.64534e-05
			0.959344	0.00334719	0.00378359					0.959344	0.0207854	0.0729423					0.984344	0	4.64529e-05
			0.979546	0.00334719	0.00378359					0.979546	0.0179153	0.0598938					1.00455	0	4.64528e-05
			0.999748	0.00334719	0.00378359					0.999748	0.0153078	0.0483361					1.02475	0	4.64528e-05
			1.01995	0.00334719	0.00378359					1.01995	0.0129971	0.0383639					1.04495	0	4.64528e-05
			1.04015	0.00334719	0.00378359					1.04015	0.0109976	0.0299732					1.06515	0	4.64528e-05
			1.06035	0.00334719	0.00378359					1.06035	0.00930647	0.0230823					1.08535	0	4.64528e-05
			1.08056	0.00334719	0.00378359					1.08056	0.00790739	0.0175548					1.10556	0	4.64528e-05
			1.10076	0.00334719	0.00378359					1.10076	0.00677451	0.0132216					1.12576	0	4.64528e-05
			1.12096	0.00334719	0.00378359					1.12096	0.00587622	0.00990005					1.14596	0	4.64528e-05
			1.14116	0.00334719	0.00378359					1.14116	0.00517843	0.00740968					1.16616	0	4.64528e-05
			1.16136	0.00334719	0.00378359					1.16136	0.00464724	0.00558264					1.18636	0	4.64528e-05
			1.18157	0.00334719	0.00378359					1.18157	0.00425083	0.00427071					1.20657	0	4.64528e-05
			1.20177	0.00334719	0.00378359					1.20177	0.00396077	0.00334846					1.22677	0	4.64528e-05
			1.22197	0.00334719	0.00378359					1.22197	0.00375261	0.0027136					1.24697	0	4.64528e-05
			1.24217	0.00334719	0.00378359					1.24217	0.00360607	0.0022856					1.26717	0	4.64528e-05
			1.26237	0.00334719	0.00378359					1.26237	0.00350485	0.00200295					1.28737	0	4.64528e-05
			1.28258	0.00334719	0.00378359					1.28258	0.00343626	0.00182008					1.30758	0	4.64528e-05
			1.30278	0.00334719	0.00378359					1.30278	0.00339064	0.00170416					1.32778	0	4.64528e-05
			1.32298	0.00334719	0.00378359					1.32298	0.00336086	0.00163215					1.34798	0	4.64528e-05
			1.34318	0.00334719	0.00378359					1.34318	0.00334177	0.00158832					1.36818	0	4.64528e-05
			1.36338	0.00334719	0.00378359					1.36338	0.00332977	0.00156216					1.38838	0	4.64528e-05
			1.38359	0.00334719	0.00378359					1.38359	0.00332236	0.00154686					1.40859	0	4.64528e-05
			1.40379	0.00334719	0.00378359					1.40379	0.00331786	0.0015381					1.42879	0	4.64528e-05
			1.42399	0.00334719	0.00378359					1.42399	0.00331518	0.00153317					1.44899	0	4.64528e-05
			1.44419	0.00334719	0.00378359					1.44419	0.00331362	0.00153045					1.46919	0	4.64528e-05
			1.46439	0.00334719	0.00378359					1.46439	0.00331272	0.00152898					1.48939	0	4.64528e-05
			1.4846	0.00334719	0.00378359					1.4846	0.00331221	0.00152821					1.5096	0	4.64528e-05
			1.5048	0.00334719	0.00378359					1.5048	0.00331193	0.0015278					1.5298	0	4.64528e-05
			1.525	0.00334719	0.00378359					1.525	0.00331178	0.0015276					1.55	0	4.64528e-05

## Sheet: Figure 2C
Open probability vs voltage at each pressure
T220A NaChBac										Fitted curves
Voltage (mV)	0 mmHg	SEM	-10 mmHg	SEM	-30 mmHg	SEM	-50 mmHg	SEM		Voltage (mV)	0 mmHg	-10 mmHg	-30 mmHg	-50 mmHg
-100	0.0234477	0.0130153	0.0275718	0.0144687	0.057336	0.0358595	0.100572	0.0226166		-100	0.0153	0.0199	0.0323	0.0381
-80	0.0191505	0.00546638	0.0241937	0.00894454	0.0613137	0.0303347	0.0742224	0.0266517		-99.6875	0.0153	0.02	0.0324	0.0383
-60	0.175919	0.0437777	0.271475	0.0689354	0.315047	0.041534	0.340318	0.0434197		-99.375	0.0154	0.02	0.0325	0.0385
-40	0.353481	0.0713903	0.443402	0.0701032	0.539793	0.087137	0.5672	0.0517067		-99.0625	0.0154	0.0201	0.0327	0.0387
-20	0.524859	0.0669106	0.550533	0.0701917	0.688143	0.10228	0.785734	0.0823517		-98.75	0.0154	0.0202	0.0329	0.0389
										-98.4375	0.0155	0.0203	0.033	0.0391
										-98.125	0.0155	0.0204	0.0332	0.0394
										-97.8125	0.0156	0.0205	0.0334	0.0396
										-97.5	0.0156	0.0206	0.0336	0.0399
										-97.1875	0.0157	0.0207	0.0338	0.0401
										-96.875	0.0157	0.0208	0.034	0.0404
										-96.5625	0.0158	0.021	0.0342	0.0407
										-96.25	0.0158	0.0211	0.0345	0.041
										-95.9375	0.0159	0.0212	0.0347	0.0414
										-95.625	0.016	0.0214	0.035	0.0417
										-95.3125	0.016	0.0215	0.0353	0.0421
										-95	0.0161	0.0217	0.0356	0.0425
										-94.6875	0.0162	0.0219	0.0359	0.0428
										-94.375	0.0163	0.0221	0.0362	0.0433
										-94.0625	0.0163	0.0223	0.0366	0.0437
										-93.75	0.0164	0.0225	0.0369	0.0442
										-93.4375	0.0165	0.0227	0.0373	0.0446
										-93.125	0.0166	0.0229	0.0377	0.0451
										-92.8125	0.0167	0.0231	0.0381	0.0456
										-92.5	0.0169	0.0234	0.0385	0.0462
										-92.1875	0.017	0.0237	0.039	0.0468
										-91.875	0.0171	0.0239	0.0394	0.0473
										-91.5625	0.0173	0.0242	0.0399	0.048
										-91.25	0.0174	0.0245	0.0404	0.0486
										-90.9375	0.0176	0.0249	0.041	0.0493
										-90.625	0.0177	0.0252	0.0415	0.05
										-90.3125	0.0179	0.0256	0.0421	0.0507
										-90	0.0181	0.0259	0.0427	0.0515
										-89.6875	0.0183	0.0263	0.0433	0.0522
										-89.375	0.0185	0.0268	0.044	0.0531
										-89.0625	0.0187	0.0272	0.0447	0.0539
										-88.75	0.0189	0.0276	0.0454	0.0548
										-88.4375	0.0191	0.0281	0.0461	0.0557
										-88.125	0.0194	0.0286	0.0469	0.0567
										-87.8125	0.0196	0.0291	0.0477	0.0577
										-87.5	0.0199	0.0297	0.0486	0.0587
										-87.1875	0.0202	0.0302	0.0494	0.0598
										-86.875	0.0205	0.0308	0.0503	0.0609
										-86.5625	0.0208	0.0314	0.0513	0.062
										-86.25	0.0211	0.0321	0.0522	0.0632
										-85.9375	0.0215	0.0328	0.0533	0.0644
										-85.625	0.0218	0.0334	0.0543	0.0657
										-85.3125	0.0222	0.0342	0.0554	0.067
										-85	0.0226	0.0349	0.0565	0.0684
										-84.6875	0.023	0.0357	0.0577	0.0698
										-84.375	0.0235	0.0365	0.0589	0.0712
										-84.0625	0.0239	0.0374	0.0601	0.0727
										-83.75	0.0244	0.0383	0.0614	0.0742
										-83.4375	0.0249	0.0392	0.0627	0.0758
										-83.125	0.0254	0.0402	0.0641	0.0775
										-82.8125	0.026	0.0411	0.0655	0.0792
										-82.5	0.0265	0.0422	0.067	0.0809
										-82.1875	0.0271	0.0432	0.0685	0.0827
										-81.875	0.0278	0.0443	0.07	0.0845
										-81.5625	0.0284	0.0455	0.0716	0.0864
										-81.25	0.0291	0.0467	0.0733	0.0884
										-80.9375	0.0298	0.0479	0.075	0.0904
										-80.625	0.0305	0.0492	0.0767	0.0924
										-80.3125	0.0312	0.0505	0.0785	0.0946
										-80	0.032	0.0518	0.0804	0.0967
										-79.6875	0.0328	0.0532	0.0823	0.0989
										-79.375	0.0337	0.0547	0.0843	0.1012
										-79.0625	0.0345	0.0561	0.0863	0.1036
										-78.75	0.0355	0.0577	0.0883	0.106
										-78.4375	0.0364	0.0592	0.0904	0.1084
										-78.125	0.0374	0.0609	0.0926	0.1109
										-77.8125	0.0384	0.0625	0.0948	0.1135
										-77.5	0.0394	0.0643	0.0971	0.1161
										-77.1875	0.0405	0.066	0.0994	0.1188
										-76.875	0.0416	0.0678	0.1018	0.1216
										-76.5625	0.0428	0.0697	0.1042	0.1244
										-76.25	0.044	0.0716	0.1067	0.1272
										-75.9375	0.0452	0.0736	0.1093	0.1301
										-75.625	0.0465	0.0756	0.1119	0.1331
										-75.3125	0.0478	0.0777	0.1145	0.1362
										-75	0.0491	0.0798	0.1172	0.1393
										-74.6875	0.0505	0.0819	0.12	0.1424
										-74.375	0.052	0.0842	0.1228	0.1456
										-74.0625	0.0535	0.0864	0.1257	0.1489
										-73.75	0.055	0.0887	0.1286	0.1522
										-73.4375	0.0565	0.0911	0.1316	0.1556
										-73.125	0.0581	0.0935	0.1347	0.159
										-72.8125	0.0598	0.096	0.1377	0.1625
										-72.5	0.0615	0.0985	0.1409	0.1661
										-72.1875	0.0632	0.1011	0.1441	0.1697
										-71.875	0.065	0.1037	0.1473	0.1733
										-71.5625	0.0668	0.1064	0.1506	0.177
										-71.25	0.0687	0.1091	0.154	0.1808
										-70.9375	0.0706	0.1119	0.1574	0.1846
										-70.625	0.0726	0.1147	0.1608	0.1885
										-70.3125	0.0746	0.1176	0.1643	0.1924
										-70	0.0767	0.1205	0.1679	0.1963
										-69.6875	0.0788	0.1235	0.1715	0.2003
										-69.375	0.0809	0.1265	0.1751	0.2044
										-69.0625	0.0831	0.1295	0.1788	0.2085
										-68.75	0.0853	0.1326	0.1825	0.2126
										-68.4375	0.0876	0.1358	0.1863	0.2168
										-68.125	0.0899	0.139	0.1901	0.221
										-67.8125	0.0923	0.1422	0.194	0.2253
										-67.5	0.0947	0.1455	0.1979	0.2296
										-67.1875	0.0972	0.1488	0.2018	0.234
										-66.875	0.0997	0.1522	0.2058	0.2383
										-66.5625	0.1022	0.1555	0.2098	0.2428
										-66.25	0.1048	0.159	0.2138	0.2472
										-65.9375	0.1075	0.1624	0.2179	0.2517
										-65.625	0.1101	0.1659	0.222	0.2562
										-65.3125	0.1128	0.1695	0.2262	0.2608
										-65	0.1156	0.173	0.2304	0.2653
										-64.6875	0.1184	0.1766	0.2346	0.2699
										-64.375	0.1212	0.1803	0.2388	0.2746
										-64.0625	0.1241	0.1839	0.2431	0.2792
										-63.75	0.127	0.1876	0.2473	0.2839
										-63.4375	0.1299	0.1913	0.2517	0.2886
										-63.125	0.1329	0.1951	0.256	0.2933
										-62.8125	0.1359	0.1989	0.2603	0.2981
										-62.5	0.139	0.2026	0.2647	0.3028
										-62.1875	0.142	0.2065	0.2691	0.3076
										-61.875	0.1452	0.2103	0.2735	0.3124
										-61.5625	0.1483	0.2141	0.2779	0.3172
										-61.25	0.1515	0.218	0.2824	0.322
										-60.9375	0.1547	0.2219	0.2868	0.3268
										-60.625	0.1579	0.2258	0.2913	0.3316
										-60.3125	0.1611	0.2297	0.2957	0.3365
										-60	0.1644	0.2336	0.3002	0.3413
										-59.6875	0.1677	0.2376	0.3047	0.3461
										-59.375	0.1711	0.2415	0.3092	0.351
										-59.0625	0.1744	0.2455	0.3137	0.3558
										-58.75	0.1778	0.2494	0.3182	0.3607
										-58.4375	0.1812	0.2534	0.3227	0.3655
										-58.125	0.1846	0.2573	0.3271	0.3704
										-57.8125	0.188	0.2613	0.3316	0.3752
										-57.5	0.1914	0.2653	0.3361	0.38
										-57.1875	0.1949	0.2693	0.3406	0.3849
										-56.875	0.1984	0.2732	0.3451	0.3897
										-56.5625	0.2018	0.2772	0.3496	0.3945
										-56.25	0.2053	0.2812	0.3541	0.3993
										-55.9375	0.2088	0.2851	0.3585	0.4041
										-55.625	0.2123	0.2891	0.363	0.4088
										-55.3125	0.2159	0.293	0.3674	0.4136
										-55	0.2194	0.2969	0.3718	0.4183
										-54.6875	0.2229	0.3009	0.3762	0.4231
										-54.375	0.2264	0.3048	0.3806	0.4278
										-54.0625	0.23	0.3087	0.385	0.4325
										-53.75	0.2335	0.3126	0.3894	0.4371
										-53.4375	0.237	0.3165	0.3937	0.4418
										-53.125	0.2406	0.3203	0.3981	0.4464
										-52.8125	0.2441	0.3242	0.4024	0.451
										-52.5	0.2476	0.328	0.4067	0.4556
										-52.1875	0.2512	0.3318	0.411	0.4601
										-51.875	0.2547	0.3356	0.4152	0.4647
										-51.5625	0.2582	0.3394	0.4194	0.4692
										-51.25	0.2617	0.3431	0.4236	0.4736
										-50.9375	0.2652	0.3468	0.4278	0.4781
										-50.625	0.2687	0.3505	0.432	0.4825
										-50.3125	0.2722	0.3542	0.4361	0.4869
										-50	0.2756	0.3579	0.4402	0.4913
										-49.6875	0.2791	0.3615	0.4442	0.4956
										-49.375	0.2825	0.3651	0.4483	0.4999
										-49.0625	0.2859	0.3687	0.4523	0.5042
										-48.75	0.2893	0.3723	0.4563	0.5084
										-48.4375	0.2927	0.3758	0.4602	0.5126
										-48.125	0.2961	0.3793	0.4642	0.5168
										-47.8125	0.2995	0.3828	0.4681	0.5209
										-47.5	0.3028	0.3862	0.4719	0.525
										-47.1875	0.3061	0.3897	0.4757	0.5291
										-46.875	0.3095	0.393	0.4795	0.5331
										-46.5625	0.3127	0.3964	0.4833	0.5371
										-46.25	0.316	0.3997	0.487	0.5411
										-45.9375	0.3192	0.403	0.4907	0.545
										-45.625	0.3225	0.4063	0.4944	0.5489
										-45.3125	0.3257	0.4095	0.498	0.5527
										-45	0.3288	0.4127	0.5016	0.5565
										-44.6875	0.332	0.4159	0.5052	0.5603
										-44.375	0.3351	0.419	0.5087	0.564
										-44.0625	0.3382	0.4221	0.5122	0.5677
										-43.75	0.3413	0.4252	0.5156	0.5714
										-43.4375	0.3443	0.4282	0.5191	0.575
										-43.125	0.3473	0.4313	0.5224	0.5786
										-42.8125	0.3503	0.4342	0.5258	0.5822
										-42.5	0.3533	0.4372	0.5291	0.5857
										-42.1875	0.3562	0.4401	0.5324	0.5891
										-41.875	0.3591	0.4429	0.5356	0.5926
										-41.5625	0.362	0.4458	0.5388	0.596
										-41.25	0.3649	0.4486	0.542	0.5993
										-40.9375	0.3677	0.4514	0.5451	0.6026
										-40.625	0.3705	0.4541	0.5482	0.6059
										-40.3125	0.3733	0.4568	0.5513	0.6092
										-40	0.376	0.4595	0.5543	0.6124
										-39.6875	0.3787	0.4621	0.5573	0.6155
										-39.375	0.3814	0.4647	0.5602	0.6186
										-39.0625	0.3841	0.4673	0.5631	0.6217
										-38.75	0.3867	0.4698	0.566	0.6248
										-38.4375	0.3893	0.4723	0.5689	0.6278
										-38.125	0.3919	0.4748	0.5717	0.6308
										-37.8125	0.3944	0.4773	0.5744	0.6337
										-37.5	0.3969	0.4797	0.5772	0.6366
										-37.1875	0.3994	0.482	0.5799	0.6394
										-36.875	0.4018	0.4844	0.5825	0.6423
										-36.5625	0.4042	0.4867	0.5852	0.6451
										-36.25	0.4066	0.489	0.5877	0.6478
										-35.9375	0.409	0.4912	0.5903	0.6505
										-35.625	0.4113	0.4934	0.5928	0.6532
										-35.3125	0.4136	0.4956	0.5953	0.6558
										-35	0.4159	0.4977	0.5978	0.6584
										-34.6875	0.4181	0.4999	0.6002	0.661
										-34.375	0.4203	0.502	0.6026	0.6635
										-34.0625	0.4225	0.504	0.605	0.666
										-33.75	0.4246	0.506	0.6073	0.6685
										-33.4375	0.4267	0.508	0.6096	0.6709
										-33.125	0.4288	0.51	0.6118	0.6733
										-32.8125	0.4309	0.5119	0.6141	0.6757
										-32.5	0.4329	0.5138	0.6162	0.678
										-32.1875	0.4349	0.5157	0.6184	0.6803
										-31.875	0.4369	0.5176	0.6205	0.6826
										-31.5625	0.4389	0.5194	0.6226	0.6848
										-31.25	0.4408	0.5212	0.6247	0.687
										-30.9375	0.4427	0.5229	0.6268	0.6892
										-30.625	0.4445	0.5247	0.6288	0.6913
										-30.3125	0.4464	0.5264	0.6307	0.6934
										-30	0.4482	0.5281	0.6327	0.6955
										-29.6875	0.45	0.5297	0.6346	0.6975
										-29.375	0.4517	0.5314	0.6365	0.6995
										-29.0625	0.4534	0.533	0.6384	0.7015
										-28.75	0.4551	0.5345	0.6402	0.7034
										-28.4375	0.4568	0.5361	0.642	0.7053
										-28.125	0.4585	0.5376	0.6438	0.7072
										-27.8125	0.4601	0.5391	0.6455	0.7091
										-27.5	0.4617	0.5406	0.6473	0.7109
										-27.1875	0.4633	0.542	0.6489	0.7127
										-26.875	0.4648	0.5435	0.6506	0.7145
										-26.5625	0.4664	0.5449	0.6523	0.7162
										-26.25	0.4679	0.5463	0.6539	0.718
										-25.9375	0.4693	0.5476	0.6555	0.7197
										-25.625	0.4708	0.549	0.657	0.7213
										-25.3125	0.4722	0.5503	0.6586	0.723
										-25	0.4736	0.5516	0.6601	0.7246
										-24.6875	0.475	0.5528	0.6616	0.7262
										-24.375	0.4764	0.5541	0.663	0.7277
										-24.0625	0.4777	0.5553	0.6645	0.7293
										-23.75	0.479	0.5565	0.6659	0.7308
										-23.4375	0.4803	0.5577	0.6673	0.7323
										-23.125	0.4816	0.5588	0.6687	0.7337
										-22.8125	0.4829	0.56	0.67	0.7352
										-22.5	0.4841	0.5611	0.6714	0.7366
										-22.1875	0.4853	0.5622	0.6727	0.738
										-21.875	0.4865	0.5633	0.674	0.7394
										-21.5625	0.4877	0.5644	0.6752	0.7407
										-21.25	0.4888	0.5654	0.6765	0.742
										-20.9375	0.49	0.5664	0.6777	0.7433
										-20.625	0.4911	0.5674	0.6789	0.7446
										-20.3125	0.4922	0.5684	0.6801	0.7459
										-20	0.4932	0.5694	0.6812	0.7471

## Sheet: Figure 2D
Open probability vs pressure at each voltage
T220A NaChBac												Fitted curves
Pressure (mmHg)	-100 mV	SEM	-80 mV	SEM	-60 mV	SEM	-40 mV	SEM	-20 mV	SEM		Pressure (mmHg)	-100 mV	-80 mV	-60 mV	-40 mV	-20 mV
0	0.0234477	0.0130153	0.0191505	0.00546638	0.175919	0.0437777	0.353481	0.0713903	0.524859	0.0669106		0	0.0371	0.0577	0.1885	0.3534	0.4881
-10	0.0275718	0.0144687	0.0241937	0.00894454	0.271475	0.0689354	0.443402	0.0701032	0.550533	0.0701917		-0.7813	0.038	0.0593	0.194	0.3613	0.4973
-30	0.057336	0.0358595	0.124194	0.0556741	0.315047	0.041534	0.539793	0.087137	0.688143	0.10228		-1.5625	0.039	0.0608	0.1995	0.3691	0.5064
-50	0.100572	0.0226166	0.147869	0.0215024	0.340318	0.0434197	0.5672	0.0517067	0.785734	0.0823517		-2.3438	0.04	0.0624	0.2049	0.3768	0.5153
												-3.125	0.0409	0.0639	0.2103	0.3843	0.524
												-3.9063	0.0419	0.0655	0.2156	0.3917	0.5326
												-4.6875	0.0428	0.067	0.2208	0.3989	0.541
												-5.4688	0.0438	0.0685	0.2259	0.406	0.5493
												-6.25	0.0447	0.07	0.2309	0.4129	0.5573
												-7.0313	0.0456	0.0715	0.2358	0.4196	0.5652
												-7.8125	0.0465	0.073	0.2406	0.4261	0.5729
												-8.5938	0.0474	0.0744	0.2452	0.4325	0.5804
												-9.375	0.0483	0.0758	0.2497	0.4387	0.5876
												-10.1563	0.0492	0.0772	0.2541	0.4447	0.5947
												-10.9375	0.05	0.0786	0.2584	0.4505	0.6016
												-11.7188	0.0509	0.0799	0.2625	0.4561	0.6083
												-12.5	0.0517	0.0812	0.2665	0.4616	0.6148
												-13.2813	0.0525	0.0825	0.2704	0.4668	0.6211
												-14.0625	0.0533	0.0838	0.2741	0.4719	0.6272
												-14.8438	0.0541	0.085	0.2777	0.4767	0.6331
												-15.625	0.0548	0.0862	0.2811	0.4814	0.6388
												-16.4063	0.0555	0.0874	0.2844	0.486	0.6443
												-17.1875	0.0563	0.0885	0.2875	0.4903	0.6496
												-17.9688	0.057	0.0896	0.2905	0.4944	0.6547
												-18.75	0.0576	0.0907	0.2934	0.4984	0.6596
												-19.5313	0.0583	0.0917	0.2962	0.5023	0.6644
												-20.3125	0.0589	0.0927	0.2988	0.5059	0.669
												-21.0938	0.0595	0.0937	0.3013	0.5094	0.6734
												-21.875	0.0601	0.0946	0.3037	0.5128	0.6776
												-22.6563	0.0607	0.0955	0.306	0.516	0.6817
												-23.4375	0.0613	0.0964	0.3082	0.519	0.6856
												-24.2188	0.0618	0.0973	0.3102	0.5219	0.6893
												-25	0.0624	0.0981	0.3122	0.5247	0.6929
												-25.7813	0.0629	0.0989	0.314	0.5274	0.6964
												-26.5625	0.0634	0.0996	0.3158	0.5299	0.6997
												-27.3438	0.0638	0.1003	0.3174	0.5323	0.7029
												-28.125	0.0643	0.101	0.319	0.5346	0.7059
												-28.9063	0.0647	0.1017	0.3205	0.5368	0.7088
												-29.6875	0.0651	0.1023	0.3219	0.5388	0.7116
												-30.4688	0.0655	0.103	0.3232	0.5408	0.7143
												-31.25	0.0659	0.1035	0.3245	0.5427	0.7168
												-32.0313	0.0663	0.1041	0.3256	0.5445	0.7192
												-32.8125	0.0667	0.1046	0.3268	0.5461	0.7216
												-33.5938	0.067	0.1052	0.3278	0.5477	0.7238
												-34.375	0.0673	0.1057	0.3288	0.5493	0.7259
												-35.1563	0.0676	0.1061	0.3297	0.5507	0.7279
												-35.9375	0.0679	0.1066	0.3306	0.5521	0.7299
												-36.7188	0.0682	0.107	0.3314	0.5534	0.7317
												-37.5	0.0685	0.1074	0.3322	0.5546	0.7335
												-38.2813	0.0688	0.1078	0.333	0.5557	0.7351
												-39.0625	0.069	0.1082	0.3337	0.5568	0.7367
												-39.8438	0.0693	0.1085	0.3343	0.5579	0.7383
												-40.625	0.0695	0.1089	0.3349	0.5589	0.7397
												-41.4063	0.0697	0.1092	0.3355	0.5598	0.7411
												-42.1875	0.0699	0.1095	0.336	0.5607	0.7424
												-42.9688	0.0701	0.1098	0.3365	0.5615	0.7437
												-43.75	0.0703	0.1101	0.337	0.5623	0.7449
												-44.5313	0.0705	0.1104	0.3375	0.5631	0.746
												-45.3125	0.0707	0.1106	0.3379	0.5638	0.7471
												-46.0938	0.0709	0.1109	0.3383	0.5644	0.7481
												-46.875	0.071	0.1111	0.3387	0.5651	0.7491
												-47.6563	0.0712	0.1113	0.339	0.5657	0.75
												-48.4375	0.0713	0.1115	0.3393	0.5662	0.7509
												-49.2188	0.0715	0.1117	0.3397	0.5668	0.7518
												-50	0.0716	0.1119	0.3399	0.5673	0.7526
