# Supplementary material for: Mechanosensitive pore opening of a prokaryotic voltage-gated sodium channel
Source: eLife. 2023 Mar 13;12:e79271. doi: 10.7554/eLife.79271 (PMC10038658; doi:10.7554/eLife.79271)
Supplement: Figure 2—source data 2. [file elife-79271-fig2-data2.xlsx]

## Sheet: Supplement 2B
All-sample probability of endogenous single channel activity
Untransfected P1KO cells at +60 mV
Current (pA)	0 mmHg	-30 mmHg
-1.95	0.00605822	0.000909036
-1.85	0.0266562	0.0121205
-1.75	0.0916306	0.0318163
-1.65	0.213552	0.125598
-1.55	0.425287	0.322708
-1.45	0.58068	0.570723
-1.35	0.615818	0.674959
-1.25	0.39954	0.519514
-1.15	0.24975	0.306648
-1.05	0.136158	0.16696
-0.95	0.10617	0.106357
-0.85	0.0778481	0.0821162
-0.75	0.0517978	0.0619659
-0.65	0.0464968	0.0466638
-0.55	0.0424075	0.0410581
-0.45	0.0443765	0.0446943
-0.35	0.0692152	0.0668141
-0.25	0.267773	0.284074
-0.15	1.13713	1.17993
-0.0499997	2.48448	2.44122
0.0500003	2.1693	2.11851
0.15	0.676249	0.687231
0.25	0.0778481	0.0999939
0.35	0.00378639	0.00606024
0.45	0	0.00136355

## Sheet: Supplement 2F
Current-voltage plots of single channel activity averaged from 60 repetitions of the voltage protocol
Endogenous current from untransfected P1KO cells
Voltage (mV)	0 mmHg	-30 mmHg	Difference
-60	-0.164152	-0.137035	0.0271168
-40	0.127209	0.15727	0.0300614
-20	0.378478	0.411448	0.0329697
0	0.62487	0.641837	0.016967
20	0.894948	0.930079	0.0351314
40	1.25814	1.31481	0.0566739
60	1.83569	1.85381	0.018112
80	2.39237	2.44016	0.047791
100	2.97094	3.20123	0.230288
