# Supplementary material for: Mechanosensitive pore opening of a prokaryotic voltage-gated sodium channel
Source: eLife. 2023 Mar 13;12:e79271. doi: 10.7554/eLife.79271 (PMC10038658; doi:10.7554/eLife.79271)
Supplement: Figure 3—source data 1. [file elife-79271-fig3-data1.xlsx]

## Sheet: Figure 3B
Peak current density (pA/pF)
T220A NaChBac	Mean	SEM
Pre-control	104.323	31.7617
Shear	133.062	38.7413
Post-control	108.366	33.1685

## Sheet: Figure 3D
All-sample probability of T220A NaChBac at -60 mV
Current (pA)	Pre-control (0 mmHg)	Pressure (-30 mmHg)	Post-control (0 mmHg)
-0.475	0.000216238	0.000189675	0.000195584
-0.425	0.000379637	0.00030688	0.00036672
-0.375	0.000769043	0.000685337	0.000769444
-0.325	0.00152388	0.00121589	0.001554
-0.275	0.00361477	0.00263354	0.00366764
-0.225	0.00740226	0.00494766	0.00839543
-0.175	0.0172515	0.0113814	0.0206621
-0.125	0.0471678	0.0303141	0.05411
-0.075	0.102769	0.0680751	0.10387
-0.025	0.163089	0.118306	0.14811
0.025	0.214347	0.178703	0.192067
0.075	0.128685	0.125407	0.125827
0.125	0.0755399	0.0842494	0.0782109
0.175	0.0422872	0.048989	0.0435974
0.225	0.0278738	0.0333627	0.0281783
0.275	0.0190272	0.0249701	0.020503
0.325	0.0130959	0.0180022	0.0142158
0.375	0.0100766	0.0148296	0.0112914
0.425	0.00768821	0.0124734	0.0087866
0.475	0.00658171	0.0112065	0.00753264
0.525	0.00611105	0.0105977	0.00692633
0.575	0.00560931	0.00965018	0.00627291
0.625	0.00561419	0.0101995	0.00619112
0.675	0.00615545	0.0108285	0.00686321
0.725	0.00663322	0.0117308	0.00749442
0.775	0.00850521	0.0144636	0.00938802
0.825	0.00967565	0.0156974	0.0105855
0.875	0.0110241	0.0183439	0.0120026
0.925	0.0118824	0.0200063	0.0128165
0.975	0.0106769	0.0193845	0.0119177
1.025	0.00933908	0.0181229	0.0107842
1.075	0.00617632	0.0137984	0.00753175
1.125	0.00414804	0.0101476	0.0055937
1.175	0.00293542	0.0079771	0.00422728
1.225	0.00199676	0.00554979	0.00293731
1.275	0.00140222	0.00396529	0.00206874
1.325	0.00104123	0.00315962	0.00162246
1.375	0.000717981	0.00235215	0.00114328
1.425	0.000531936	0.00207256	0.000960139
1.475	0.00043736	0.00170305	0.000761443
1.525	0	0	0

## Sheet: Figure 3E-F
Open probability of T220A NaChBac at -60 mV
Pre-control (0 mmHg)	Pressure (-30 mmHg)	Post-control (0 mmHg)	Difference (Post−Pre)
0.0984	0.204996	0.093604	-0.004796
0.2093	0.479425	0.23215	0.02285
0.123256	0.260621	0.164005	0.0407487
0.0635	0.425425	0.17985	0.11635
0.105143	0.338057	0.0752	-0.0299429
0.1078	0.220244	0.0960815	-0.0117185
0.0967556	0.231756	0.0996889	0.00293333
0.1872	0.278324	0.163335	-0.0238649
0.0864421	0.128568	0.101705	0.0152632
0.111157	0.217395	0.135724	0.0245667
0.0158602	0.0792439	0.0265593	0.0106992
0.37475	0.510687	0.35585	-0.0189
0.0265	0.100176	0.0304118	0.00391176
