# Supplementary material for: Mechanosensitive pore opening of a prokaryotic voltage-gated sodium channel
Source: eLife. 2023 Mar 13;12:e79271. doi: 10.7554/eLife.79271 (PMC10038658; doi:10.7554/eLife.79271)
Supplement: Figure 3—source data 2. [file elife-79271-fig3-data2.xlsx]

## Sheet: Supplement 3C
Open probability
T220A NaChBac								Fitted curves
Voltage (mV)	Pre-control (0 mmHg)	SEM	Pressure (-30 mmHg)	SEM	Post-control (0 mmHg)	SEM		Voltage (mV)	Pre-control (0 mmHg)	Pressure (-30 mmHg)	Post-control (0 mmHg)
-100	0.0114788	0.00344158	0.057336	0.0358595	0.0241126	0.00677908		-100	0.0150402	0.0448654	0.0250193
-80	0.0129669	0.00528991	0.0613137	0.0303347	0.0303944	0.011858		-99.6875	0.0150494	0.0449383	0.0250369
-60	0.16249	0.0308461	0.315047	0.041534	0.20187	0.0368057		-99.375	0.0150594	0.0450159	0.0250557
-40	0.360047	0.0891426	0.539793	0.087137	0.397733	0.0793815		-99.0625	0.01507	0.0450984	0.0250758
-20	0.577224	0.0983334	0.688143	0.10228	0.652726	0.104493		-98.75	0.0150814	0.0451862	0.0250974
								-98.4375	0.0150937	0.0452796	0.0251205
								-98.125	0.0151069	0.0453788	0.0251452
								-97.8125	0.0151209	0.0454842	0.0251716
								-97.5	0.015136	0.0455962	0.0251998
								-97.1875	0.0151522	0.045715	0.02523
								-96.875	0.0151696	0.0458411	0.0252623
								-96.5625	0.0151881	0.0459749	0.0252967
								-96.25	0.015208	0.0461168	0.0253336
								-95.9375	0.0152293	0.0462672	0.0253729
								-95.625	0.0152521	0.0464265	0.0254148
								-95.3125	0.0152765	0.0465953	0.0254596
								-95	0.0153025	0.046774	0.0255073
								-94.6875	0.0153304	0.046963	0.0255583
								-94.375	0.0153602	0.047163	0.0256126
								-94.0625	0.015392	0.0473745	0.0256704
								-93.75	0.015426	0.047598	0.025732
								-93.4375	0.0154624	0.0478342	0.0257977
								-93.125	0.0155012	0.0480835	0.0258675
								-92.8125	0.0155425	0.0483468	0.0259419
								-92.5	0.0155867	0.0486245	0.026021
								-92.1875	0.0156338	0.0489174	0.0261051
								-91.875	0.0156841	0.0492261	0.0261945
								-91.5625	0.0157376	0.0495514	0.0262896
								-91.25	0.0157947	0.049894	0.0263905
								-90.9375	0.0158554	0.0502547	0.0264977
								-90.625	0.0159202	0.0506342	0.0266115
								-90.3125	0.0159891	0.0510334	0.0267323
								-90	0.0160624	0.0514529	0.0268603
								-89.6875	0.0161404	0.0518938	0.0269961
								-89.375	0.0162233	0.0523568	0.02714
								-89.0625	0.0163115	0.0528428	0.0272925
								-88.75	0.0164052	0.0533528	0.0274539
								-88.4375	0.0165047	0.0538876	0.0276249
								-88.125	0.0166104	0.0544481	0.0278057
								-87.8125	0.0167226	0.0550354	0.027997
								-87.5	0.0168416	0.0556504	0.0281992
								-87.1875	0.0169678	0.056294	0.0284129
								-86.875	0.0171016	0.0569673	0.0286386
								-86.5625	0.0172435	0.0576713	0.0288769
								-86.25	0.0173937	0.058407	0.0291285
								-85.9375	0.0175528	0.0591754	0.0293939
								-85.625	0.0177212	0.0599777	0.0296737
								-85.3125	0.0178994	0.0608147	0.0299686
								-85	0.0180878	0.0616877	0.0302794
								-84.6875	0.018287	0.0625976	0.0306066
								-84.375	0.0184975	0.0635456	0.030951
								-84.0625	0.0187198	0.0645326	0.0313133
								-83.75	0.0189546	0.0655599	0.0316943
								-83.4375	0.0192023	0.0666284	0.0320948
								-83.125	0.0194637	0.0677392	0.0325155
								-82.8125	0.0197392	0.0688933	0.0329573
								-82.5	0.0200296	0.070092	0.033421
								-82.1875	0.0203356	0.0713361	0.0339074
								-81.875	0.0206577	0.0726267	0.0344175
								-81.5625	0.0209967	0.0739648	0.0349521
								-81.25	0.0213534	0.0753514	0.035512
								-80.9375	0.0217284	0.0767876	0.0360983
								-80.625	0.0221226	0.0782743	0.0367118
								-80.3125	0.0225366	0.0798124	0.0373535
								-80	0.0229714	0.0814028	0.0380243
								-79.6875	0.0234277	0.0830465	0.0387253
								-79.375	0.0239063	0.0847443	0.0394573
								-79.0625	0.0244081	0.0864969	0.0402214
								-78.75	0.024934	0.0883054	0.0410186
								-78.4375	0.0254849	0.0901702	0.0418498
								-78.125	0.0260615	0.0920923	0.0427161
								-77.8125	0.026665	0.0940723	0.0436185
								-77.5	0.0272961	0.0961108	0.0445579
								-77.1875	0.0279558	0.0982084	0.0455354
								-76.875	0.028645	0.100366	0.0465521
								-76.5625	0.0293648	0.102583	0.0476088
								-76.25	0.030116	0.104861	0.0487066
								-75.9375	0.0308997	0.1072	0.0498465
								-75.625	0.0317168	0.109601	0.0510295
								-75.3125	0.0325683	0.112063	0.0522565
								-75	0.0334552	0.114586	0.0535285
								-74.6875	0.0343784	0.117172	0.0548464
								-74.375	0.0353391	0.11982	0.0562112
								-74.0625	0.036338	0.122531	0.0576238
								-73.75	0.0373763	0.125303	0.059085
								-73.4375	0.0384548	0.128138	0.0605956
								-73.125	0.0395746	0.131035	0.0621566
								-72.8125	0.0407367	0.133993	0.0637688
								-72.5	0.0419418	0.137013	0.0654328
								-72.1875	0.0431911	0.140094	0.0671495
								-71.875	0.0444854	0.143237	0.0689195
								-71.5625	0.0458255	0.146439	0.0707435
								-71.25	0.0472125	0.149702	0.0726221
								-70.9375	0.0486471	0.153024	0.074556
								-70.625	0.0501301	0.156404	0.0765457
								-70.3125	0.0516624	0.159843	0.0785916
								-70	0.0532448	0.163339	0.0806943
								-69.6875	0.054878	0.166891	0.0828542
								-69.375	0.0565627	0.170499	0.0850715
								-69.0625	0.0582996	0.174161	0.0873466
								-68.75	0.0600894	0.177878	0.0896799
								-68.4375	0.0619326	0.181646	0.0920713
								-68.125	0.0638299	0.185467	0.0945213
								-67.8125	0.0657817	0.189338	0.0970297
								-67.5	0.0677885	0.193257	0.0995967
								-67.1875	0.0698509	0.197225	0.102222
								-66.875	0.0719691	0.20124	0.104906
								-66.5625	0.0741435	0.2053	0.107648
								-66.25	0.0763744	0.209403	0.110449
								-65.9375	0.0786621	0.213549	0.113307
								-65.625	0.0810068	0.217737	0.116223
								-65.3125	0.0834085	0.221963	0.119196
								-65	0.0858673	0.226228	0.122226
								-64.6875	0.0883834	0.23053	0.125312
								-64.375	0.0909567	0.234866	0.128454
								-64.0625	0.093587	0.239235	0.13165
								-63.75	0.0962742	0.243636	0.134902
								-63.4375	0.0990182	0.248068	0.138207
								-63.125	0.101819	0.252527	0.141564
								-62.8125	0.104675	0.257013	0.144974
								-62.5	0.107588	0.261524	0.148435
								-62.1875	0.110555	0.266058	0.151947
								-61.875	0.113578	0.270614	0.155507
								-61.5625	0.116655	0.275189	0.159116
								-61.25	0.119786	0.279783	0.162772
								-60.9375	0.122969	0.284393	0.166474
								-60.625	0.126205	0.289017	0.170221
								-60.3125	0.129493	0.293654	0.174011
								-60	0.132831	0.298303	0.177843
								-59.6875	0.13622	0.30296	0.181717
								-59.375	0.139657	0.307626	0.18563
								-59.0625	0.143142	0.312297	0.189581
								-58.75	0.146674	0.316973	0.193569
								-58.4375	0.150251	0.321652	0.197593
								-58.125	0.153874	0.326331	0.201651
								-57.8125	0.15754	0.33101	0.205741
								-57.5	0.161249	0.335687	0.209861
								-57.1875	0.164998	0.34036	0.214012
								-56.875	0.168788	0.345027	0.21819
								-56.5625	0.172615	0.349688	0.222394
								-56.25	0.17648	0.35434	0.226623
								-55.9375	0.180381	0.358982	0.230875
								-55.625	0.184316	0.363613	0.235148
								-55.3125	0.188285	0.368231	0.239441
								-55	0.192284	0.372835	0.243753
								-54.6875	0.196314	0.377424	0.248081
								-54.375	0.200372	0.381996	0.252423
								-54.0625	0.204456	0.38655	0.256779
								-53.75	0.208567	0.391084	0.261147
								-53.4375	0.212701	0.395598	0.265525
								-53.125	0.216857	0.40009	0.269911
								-52.8125	0.221034	0.404559	0.274304
								-52.5	0.22523	0.409004	0.278702
								-52.1875	0.229444	0.413424	0.283104
								-51.875	0.233673	0.417818	0.287508
								-51.5625	0.237917	0.422184	0.291912
								-51.25	0.242173	0.426523	0.296316
								-50.9375	0.246441	0.430832	0.300717
								-50.625	0.250718	0.435112	0.305114
								-50.3125	0.255003	0.439361	0.309506
								-50	0.259295	0.443579	0.31389
								-49.6875	0.263592	0.447764	0.318267
								-49.375	0.267891	0.451916	0.322634
								-49.0625	0.272193	0.456034	0.326989
								-48.75	0.276495	0.460118	0.331333
								-48.4375	0.280796	0.464166	0.335663
								-48.125	0.285094	0.468179	0.339977
								-47.8125	0.289388	0.472156	0.344276
								-47.5	0.293676	0.476096	0.348557
								-47.1875	0.297958	0.479999	0.35282
								-46.875	0.302231	0.483864	0.357063
								-46.5625	0.306494	0.487691	0.361286
								-46.25	0.310747	0.49148	0.365486
								-45.9375	0.314987	0.495229	0.369664
								-45.625	0.319214	0.49894	0.373817
								-45.3125	0.323426	0.502611	0.377946
								-45	0.327622	0.506242	0.382049
								-44.6875	0.331801	0.509834	0.386126
								-44.375	0.335962	0.513385	0.390175
								-44.0625	0.340103	0.516895	0.394195
								-43.75	0.344224	0.520366	0.398187
								-43.4375	0.348323	0.523795	0.402148
								-43.125	0.3524	0.527184	0.406079
								-42.8125	0.356454	0.530532	0.409979
								-42.5	0.360483	0.533839	0.413846
								-42.1875	0.364486	0.537105	0.417681
								-41.875	0.368464	0.540331	0.421483
								-41.5625	0.372414	0.543515	0.425251
								-41.25	0.376337	0.546658	0.428985
								-40.9375	0.380231	0.549761	0.432684
								-40.625	0.384095	0.552823	0.436348
								-40.3125	0.38793	0.555844	0.439977
								-40	0.391734	0.558825	0.443569
								-39.6875	0.395507	0.561765	0.447125
								-39.375	0.399248	0.564665	0.450645
								-39.0625	0.402956	0.567525	0.454128
								-38.75	0.406631	0.570345	0.457573
								-38.4375	0.410273	0.573126	0.460981
								-38.125	0.413881	0.575867	0.464351
								-37.8125	0.417454	0.578568	0.467683
								-37.5	0.420993	0.58123	0.470978
								-37.1875	0.424496	0.583854	0.474234
								-36.875	0.427964	0.586439	0.477451
								-36.5625	0.431396	0.588986	0.480631
								-36.25	0.434792	0.591495	0.483772
								-35.9375	0.438152	0.593966	0.486874
								-35.625	0.441475	0.5964	0.489938
								-35.3125	0.444761	0.598796	0.492964
								-35	0.44801	0.601156	0.495951
								-34.6875	0.451221	0.603479	0.498899
								-34.375	0.454396	0.605766	0.501809
								-34.0625	0.457533	0.608017	0.504681
								-33.75	0.460633	0.610233	0.507514
								-33.4375	0.463695	0.612414	0.51031
								-33.125	0.466719	0.61456	0.513067
								-32.8125	0.469706	0.616671	0.515787
								-32.5	0.472655	0.618748	0.518469
								-32.1875	0.475567	0.620792	0.521113
								-31.875	0.478441	0.622802	0.52372
								-31.5625	0.481278	0.62478	0.52629
								-31.25	0.484077	0.626725	0.528823
								-30.9375	0.486838	0.628637	0.531319
								-30.625	0.489563	0.630518	0.533779
								-30.3125	0.492251	0.632367	0.536202
								-30	0.494901	0.634186	0.53859
								-29.6875	0.497515	0.635973	0.540942
								-29.375	0.500092	0.637731	0.543258
								-29.0625	0.502633	0.639458	0.54554
								-28.75	0.505137	0.641156	0.547786
								-28.4375	0.507606	0.642825	0.549998
								-28.125	0.510038	0.644465	0.552175
								-27.8125	0.512435	0.646076	0.554319
								-27.5	0.514797	0.64766	0.556429
								-27.1875	0.517124	0.649216	0.558506
								-26.875	0.519415	0.650745	0.56055
								-26.5625	0.521673	0.652247	0.562561
								-26.25	0.523896	0.653722	0.564539
								-25.9375	0.526084	0.655172	0.566486
								-25.625	0.52824	0.656595	0.568401
								-25.3125	0.530361	0.657994	0.570285
								-25	0.53245	0.659367	0.572138
								-24.6875	0.534506	0.660716	0.573961
								-24.375	0.536529	0.662041	0.575753
								-24.0625	0.538521	0.663341	0.577515
								-23.75	0.54048	0.664618	0.579248
								-23.4375	0.542408	0.665873	0.580952
								-23.125	0.544305	0.667104	0.582627
								-22.8125	0.54617	0.668313	0.584273
								-22.5	0.548006	0.6695	0.585892
								-22.1875	0.549811	0.670665	0.587483
								-21.875	0.551586	0.671808	0.589046
								-21.5625	0.553332	0.672931	0.590582
								-21.25	0.555049	0.674033	0.592092
								-20.9375	0.556737	0.675114	0.593576
								-20.625	0.558397	0.676176	0.595034
								-20.3125	0.560029	0.677217	0.596466
								-20	0.561633	0.67824	0.597873

## Sheet: Supplement 3D
Change (difference) in open probability from pre-control
T220A NaChBac
Voltage (mV)	Pressure (-30 mmHg)	SEM	Post-control (0 mmHg)	SEM
-100	0.0458571	0.0346944	0.0126338	0.00594439
-80	0.0483467	0.0267603	0.0174275	0.00920306
-60	0.152557	0.0193449	0.0393803	0.0167431
-40	0.179746	0.0366103	0.037686	0.0507007
-20	0.110919	0.0358219	0.0755019	0.0479765
