# Supplementary material for: Mechanosensitive pore opening of a prokaryotic voltage-gated sodium channel
Source: eLife. 2023 Mar 13;12:e79271. doi: 10.7554/eLife.79271 (PMC10038658; doi:10.7554/eLife.79271)
Supplement: Figure 3—source data 3. [file elife-79271-fig3-data3.xlsx]

## Sheet: Supplement 3C-2
Conductance normalized to maximum conductance of pre-control (G/Gmax) vs voltage
Nav1.5	Pre-control (0 mL/min)		Shear (10 mL/min)		Post-control (0 mL/min)			Fitted curves
Voltage (mV)	Mean	SEM	Mean	SEM	Mean	SEM		Voltage (mV)	Pre-control (0 mL/min)	Shear (10 mL/min)	Post-control (0 mL/min)
-120	0.00105941	0.000355499	0.00136038	0.000620991	0.00137866	0.000750915		-120	0.001	0.001	0.001
-115	0.000880826	0.000286815	0.00142672	0.000658276	0.00105979	0.000524971		-119.531	0.001	0.001	0.001
-110	0.00078216	0.00031966	0.00123892	0.000572015	0.00122477	0.000611092		-119.062	0.001	0.001	0.001
-105	0.000762252	0.00027684	0.00167829	0.000718227	0.00106433	0.000748349		-118.594	0.001	0.001	0.001
-100	0.000697867	0.000355027	0.00138859	0.000625205	0.00154468	0.000862117		-118.125	0.001	0.001	0.001
-95	0.000456046	0.000304263	0.00102413	0.000518521	0.000963892	0.00049507		-117.656	0.001	0.001	0.00100001
-90	0.00520863	0.000657554	0.00443204	0.000772199	0.00562749	0.000747839		-117.188	0.001	0.001	0.00100001
-85	0.0074496	0.000742369	0.00767088	0.000803869	0.0103452	0.00120756		-116.719	0.001	0.001	0.00100001
-80	0.0154152	0.00195298	0.0185829	0.00273763	0.0239928	0.00407061		-116.25	0.001	0.001	0.00100001
-75	0.0390059	0.0056468	0.0514781	0.0083145	0.0649865	0.0115283		-115.781	0.00100001	0.001	0.00100001
-70	0.0944374	0.0123186	0.133854	0.0190874	0.152035	0.024097		-115.312	0.00100001	0.001	0.00100001
-65	0.210084	0.019654	0.307669	0.0317318	0.290703	0.0380331		-114.844	0.00100001	0.001	0.00100002
-60	0.379435	0.0263731	0.549517	0.0419737	0.455852	0.0420061		-114.375	0.00100001	0.001	0.00100002
-55	0.554121	0.0264482	0.792153	0.0378415	0.614393	0.0397083		-113.906	0.00100001	0.001	0.00100003
-50	0.697186	0.0239099	0.984961	0.0317866	0.750513	0.0369009		-113.438	0.00100002	0.001	0.00100003
-45	0.813047	0.0187355	1.12158	0.0246518	0.845018	0.0361853		-112.969	0.00100002	0.001	0.00100004
-40	0.893665	0.0139837	1.21346	0.0218672	0.910682	0.0360126		-112.5	0.00100002	0.001	0.00100005
-35	0.954511	0.00965515	1.25893	0.0221467	0.954741	0.0363331		-112.031	0.00100003	0.001	0.00100006
-30	0.984051	0.00830499	1.28687	0.0198472	0.98263	0.0380254		-111.562	0.00100003	0.001	0.00100007
-25	1.00469	0.00491905	1.30016	0.0200519	0.994928	0.0377518		-111.094	0.00100004	0.001	0.00100009
-20	1.01102	0.00403527	1.29311	0.0200279	0.998381	0.0364772		-110.625	0.00100005	0.00100001	0.00100011
-15	1.00711	0.00448353	1.28248	0.0237943	0.985516	0.0355984		-110.156	0.00100006	0.00100001	0.00100013
-10	0.994006	0.00855967	1.25651	0.0225965	0.962278	0.0348482		-109.688	0.00100008	0.00100001	0.00100016
-5	1.00842	0.0060962	1.27325	0.0305613	0.962925	0.0305		-109.219	0.00100009	0.00100001	0.0010002
0	0.998501	0.00594114	1.25478	0.0324877	0.943717	0.029431		-108.75	0.00100011	0.00100001	0.00100024
								-108.281	0.00100014	0.00100002	0.0010003
								-107.812	0.00100017	0.00100002	0.00100036
								-107.344	0.00100021	0.00100003	0.00100044
								-106.875	0.00100025	0.00100003	0.00100054
								-106.406	0.00100031	0.00100004	0.00100066
								-105.938	0.00100037	0.00100005	0.00100081
								-105.469	0.00100045	0.00100007	0.00100099
								-105	0.00100055	0.00100008	0.00100121
								-104.531	0.00100067	0.0010001	0.00100147
								-104.062	0.00100082	0.00100013	0.00100179
								-103.594	0.001001	0.00100016	0.00100219
								-103.125	0.00100121	0.0010002	0.00100266
								-102.656	0.00100147	0.00100026	0.00100324
								-102.188	0.00100179	0.00100032	0.00100395
								-101.719	0.00100217	0.0010004	0.00100481
								-101.25	0.00100263	0.00100051	0.00100584
								-100.781	0.0010032	0.00100064	0.0010071
								-100.312	0.00100388	0.0010008	0.00100863
								-99.8438	0.0010047	0.001001	0.00101048
								-99.375	0.0010057	0.00100125	0.00101272
								-98.9062	0.0010069	0.00100157	0.00101543
								-98.4375	0.00100835	0.00100196	0.0010187
								-97.9688	0.00101011	0.00100245	0.00102266
								-97.5	0.00101223	0.00100307	0.00102743
								-97.0312	0.00101478	0.00100383	0.00103318
								-96.5625	0.00101786	0.00100479	0.00104011
								-96.0938	0.00102156	0.00100597	0.00104844
								-95.625	0.00102602	0.00100745	0.00105846
								-95.1562	0.00103137	0.00100929	0.0010705
								-94.6875	0.0010378	0.00101158	0.00108494
								-94.2188	0.00104551	0.00101442	0.00110224
								-93.75	0.00105476	0.00101794	0.00112295
								-93.2812	0.00106583	0.0010223	0.00114771
								-92.8125	0.00107908	0.00102771	0.00117727
								-92.3438	0.00109491	0.00103439	0.00121252
								-91.875	0.00111381	0.00104264	0.00125449
								-91.4062	0.00113634	0.00105283	0.00130439
								-90.9375	0.00116317	0.00106539	0.00136364
								-90.4688	0.00119508	0.00108085	0.00143387
								-90	0.00123299	0.00109985	0.00151699
								-89.5312	0.00127796	0.00112318	0.00161519
								-89.0625	0.00133123	0.00115177	0.00173103
								-88.5938	0.00139425	0.00118678	0.00186742
								-88.125	0.00146868	0.00122955	0.0020277
								-87.6562	0.00155646	0.00128173	0.00221571
								-87.1875	0.0016598	0.00134527	0.0024358
								-86.7188	0.00178127	0.00142251	0.00269293
								-86.25	0.0019238	0.00151622	0.00299268
								-85.7812	0.00209075	0.00162968	0.00334139
								-85.3125	0.00228592	0.00176678	0.00374611
								-84.8438	0.00251365	0.00193207	0.00421479
								-84.375	0.00277886	0.0021309	0.00475623
								-83.9062	0.00308707	0.00236952	0.00538021
								-83.4375	0.00344452	0.00265519	0.00609752
								-82.9688	0.00385818	0.00299631	0.00692001
								-82.5	0.0043358	0.00340258	0.00786063
								-82.0312	0.00488603	0.00388512	0.00893346
								-81.5625	0.00551842	0.00445665	0.0101537
								-81.0938	0.00624349	0.00513159	0.0115378
								-80.625	0.00707277	0.00592626	0.0131032
								-80.1562	0.00801885	0.00685901	0.0148686
								-79.6875	0.00909538	0.00795034	0.0168535
								-79.2188	0.0103171	0.009223	0.0190787
								-78.75	0.0116999	0.0107021	0.0215655
								-78.2812	0.0132608	0.0124153	0.0243361
								-77.8125	0.0150176	0.0143925	0.0274134
								-77.3438	0.0169894	0.0166662	0.0308202
								-76.875	0.0191962	0.0192711	0.03458
								-76.4062	0.0216586	0.0222442	0.038716
								-75.9375	0.0243982	0.0256247	0.0432508
								-75.4688	0.0274369	0.0294532	0.0482069
								-75	0.0307971	0.033772	0.0536054
								-74.5312	0.0345015	0.0386243	0.0594666
								-74.0625	0.0385726	0.0440538	0.0658091
								-73.5938	0.0430329	0.0501043	0.0726497
								-73.125	0.047904	0.0568189	0.0800032
								-72.6562	0.0532071	0.0642394	0.0878819
								-72.1875	0.0589622	0.0724057	0.0962958
								-71.7188	0.0651879	0.0813549	0.105252
								-71.25	0.0719012	0.0911208	0.114753
								-70.7812	0.0791175	0.101733	0.124802
								-70.3125	0.0868496	0.113216	0.135394
								-69.8438	0.0951081	0.12559	0.146525
								-69.375	0.103901	0.138868	0.158185
								-68.9062	0.113234	0.153057	0.17036
								-68.4375	0.123108	0.168157	0.183036
								-67.9688	0.133524	0.184161	0.196193
								-67.5	0.144476	0.201055	0.209808
								-67.0312	0.155958	0.218818	0.223857
								-66.5625	0.167959	0.237422	0.238312
								-66.0938	0.180466	0.256831	0.253142
								-65.625	0.19346	0.277003	0.268317
								-65.1562	0.206923	0.297891	0.283801
								-64.6875	0.220832	0.319441	0.299561
								-64.2188	0.235161	0.341596	0.315559
								-63.75	0.249884	0.364293	0.331758
								-63.2812	0.264969	0.387468	0.348122
								-62.8125	0.280385	0.411051	0.364611
								-62.3438	0.296099	0.434974	0.38119
								-61.875	0.312077	0.459166	0.39782
								-61.4062	0.328282	0.483556	0.414466
								-60.9375	0.344679	0.508073	0.431093
								-60.4688	0.361231	0.532648	0.447666
								-60	0.377902	0.557215	0.464152
								-59.5312	0.394654	0.581708	0.480522
								-59.0625	0.411453	0.606065	0.496744
								-58.5938	0.428263	0.630228	0.512793
								-58.125	0.44505	0.65414	0.528642
								-57.6562	0.461781	0.677752	0.544267
								-57.1875	0.478425	0.701015	0.559647
								-56.7188	0.494951	0.723888	0.574762
								-56.25	0.51133	0.74633	0.589595
								-55.7812	0.527537	0.768307	0.604129
								-55.3125	0.543545	0.789791	0.618352
								-54.8438	0.559333	0.810753	0.63225
								-54.375	0.574878	0.831174	0.645815
								-53.9062	0.590163	0.851033	0.659039
								-53.4375	0.605168	0.870317	0.671913
								-52.9688	0.619879	0.889015	0.684434
								-52.5	0.634283	0.90712	0.696598
								-52.0312	0.648367	0.924626	0.708403
								-51.5625	0.662123	0.941532	0.719848
								-51.0938	0.67554	0.957838	0.730934
								-50.625	0.688613	0.973548	0.741661
								-50.1562	0.701337	0.988667	0.752034
								-49.6875	0.713707	1.0032	0.762053
								-49.2188	0.725722	1.01716	0.771726
								-48.75	0.73738	1.03055	0.781055
								-48.2812	0.748682	1.04339	0.790047
								-47.8125	0.759629	1.05569	0.798707
								-47.3438	0.770222	1.06746	0.807043
								-46.875	0.780465	1.07871	0.815062
								-46.4062	0.790361	1.08947	0.82277
								-45.9375	0.799916	1.09974	0.830176
								-45.4688	0.809134	1.10954	0.837288
								-45	0.818022	1.11888	0.844114
								-44.5312	0.826584	1.12779	0.850661
								-44.0625	0.834829	1.13628	0.856938
								-43.5938	0.842763	1.14436	0.862954
								-43.125	0.850394	1.15205	0.868717
								-42.6562	0.857729	1.15936	0.874236
								-42.1875	0.864775	1.16632	0.879517
								-41.7188	0.871542	1.17293	0.884571
								-41.25	0.878037	1.17921	0.889405
								-40.7812	0.884267	1.18517	0.894026
								-40.3125	0.890242	1.19083	0.898444
								-39.8438	0.895969	1.1962	0.902665
								-39.375	0.901457	1.20129	0.906697
								-38.9062	0.906713	1.20613	0.910547
								-38.4375	0.911746	1.21071	0.914223
								-37.9688	0.916563	1.21505	0.917732
								-37.5	0.921172	1.21916	0.92108
								-37.0312	0.925581	1.22306	0.924274
								-36.5625	0.929796	1.22675	0.92732
								-36.0938	0.933827	1.23025	0.930226
								-35.625	0.937679	1.23356	0.932996
								-35.1562	0.941359	1.23669	0.935636
								-34.6875	0.944875	1.23965	0.938153
								-34.2188	0.948233	1.24246	0.940551
								-33.75	0.951439	1.24511	0.942835
								-33.2812	0.954499	1.24762	0.945012
								-32.8125	0.95742	1.25	0.947085
								-32.3438	0.960208	1.25224	0.949059
								-31.875	0.962867	1.25437	0.950938
								-31.4062	0.965404	1.25637	0.952728
								-30.9375	0.967824	1.25827	0.954432
								-30.4688	0.970131	1.26007	0.956053
								-30	0.972331	1.26176	0.957597
								-29.5312	0.974428	1.26336	0.959066
								-29.0625	0.976427	1.26488	0.960463
								-28.5938	0.978333	1.26631	0.961793
								-28.125	0.980148	1.26766	0.963059
								-27.6562	0.981878	1.26893	0.964262
								-27.1875	0.983527	1.27014	0.965407
								-26.7188	0.985097	1.27128	0.966496
								-26.25	0.986593	1.27235	0.967532
								-25.7812	0.988017	1.27337	0.968517
								-25.3125	0.989374	1.27433	0.969454
								-24.8438	0.990666	1.27523	0.970344
								-24.375	0.991896	1.27609	0.971191
								-23.9062	0.993068	1.2769	0.971997
								-23.4375	0.994183	1.27766	0.972762
								-22.9688	0.995245	1.27838	0.97349
								-22.5	0.996256	1.27906	0.974182
								-22.0312	0.997218	1.2797	0.97484
								-21.5625	0.998133	1.28031	0.975465
								-21.0938	0.999005	1.28088	0.976059
								-20.625	0.999834	1.28142	0.976624
								-20.1562	1.00062	1.28193	0.977161
								-19.6875	1.00137	1.28241	0.977672
								-19.2188	1.00209	1.28286	0.978157
								-18.75	1.00277	1.28329	0.978617
								-18.2812	1.00342	1.2837	0.979055
								-17.8125	1.00403	1.28408	0.979472
								-17.3438	1.00462	1.28444	0.979867
								-16.875	1.00518	1.28478	0.980243
								-16.4062	1.00571	1.2851	0.9806
								-15.9375	1.00621	1.2854	0.98094
								-15.4688	1.00669	1.28569	0.981262
								-15	1.00715	1.28596	0.981569
								-14.5312	1.00758	1.28621	0.98186
								-14.0625	1.00799	1.28645	0.982136
								-13.5938	1.00839	1.28668	0.982399
								-13.125	1.00876	1.28689	0.982649
								-12.6562	1.00912	1.2871	0.982886
								-12.1875	1.00945	1.28729	0.983111
								-11.7188	1.00977	1.28747	0.983326
								-11.25	1.01008	1.28764	0.983529
								-10.7812	1.01037	1.2878	0.983722
								-10.3125	1.01065	1.28795	0.983906
								-9.84375	1.01091	1.28809	0.98408
								-9.375	1.01116	1.28822	0.984246
								-8.90625	1.0114	1.28835	0.984403
								-8.4375	1.01162	1.28847	0.984553
								-7.96875	1.01184	1.28858	0.984695
								-7.5	1.01204	1.28869	0.98483
								-7.03125	1.01224	1.28879	0.984958
								-6.5625	1.01242	1.28889	0.98508
								-6.09375	1.0126	1.28898	0.985196
								-5.625	1.01277	1.28906	0.985306
								-5.15625	1.01293	1.28914	0.98541
								-4.6875	1.01308	1.28921	0.985509
								-4.21875	1.01322	1.28929	0.985603
								-3.75	1.01336	1.28935	0.985693
								-3.28125	1.01349	1.28942	0.985778
								-2.8125	1.01361	1.28948	0.985858
								-2.34375	1.01373	1.28953	0.985935
								-1.875	1.01384	1.28959	0.986008
								-1.40625	1.01395	1.28964	0.986077
								-0.9375	1.01405	1.28968	0.986143
								-0.46875	1.01414	1.28973	0.986205
								0	1.01423	1.28977	0.986265

## Sheet: Supplement 3D-2
Maximum conductance normalized to cell capacitance (nS/pF)
Pre-control (0 mL/min)	Shear (10 mL/min)	Post-control (0 mL/min)
1.57311	1.93925	1.93259
1.51739	2.31516	1.40403
1.29884	1.71377	0.847974
2.50102	2.98543	2.70671
3.48115	4.36336	2.83448
3.98696	4.71303	4.25783
2.43628	2.95262	2.42773
1.95999	2.36108	3.03981
1.75815	2.1343	1.29386
1.59458	2.0464	1.692
1.58839	2.15714	1.59019
0.953036	1.20355	0.90904
1.40776	1.85217	1.42229
2.32711	2.79134	2.07776
1.63165	1.81796	1.70604
0.954256	1.08756	0.793586
3.54618	4.56826	3.06882
1.67708	2.32042	1.51407
1.27471	1.70108	1.12968
2.68495	3.57301	2.73662
1.44918	1.87628	1.16595
2.60017	3.91435	2.75965
1.16316	1.49886	1.31049
1.95735	2.48546	2.03311

## Sheet: Supplement 3E-2
Change in maximum conductance normalized to pre-control
Shear (10 mL/min)	Post-control (0 mL/min)
0.23275	0.228517
0.525751	-0.0747075
0.319467	-0.347128
0.193687	0.0822447
0.253424	-0.185764
0.182111	0.0679385
0.211936	-0.00351166
0.204638	0.550931
0.213948	-0.26408
0.283348	0.0610982
0.358067	0.00113259
0.262863	-0.0461636
0.315686	0.0103187
0.199489	-0.10715
0.114183	0.0455907
0.139698	-0.168372
0.288221	-0.134612
0.383606	-0.097201
0.334478	-0.11378
0.330755	0.0192469
0.294718	-0.195447
0.505421	0.0613349
0.288603	0.126659
0.269808	0.0387056
