# Supplementary material for: Mechanosensitive pore opening of a prokaryotic voltage-gated sodium channel
Source: eLife. 2023 Mar 13;12:e79271. doi: 10.7554/eLife.79271 (PMC10038658; doi:10.7554/eLife.79271)
Supplement: Figure 4—source data 1. [file elife-79271-fig4-data1.xlsx]

## Sheet: Figure 4B
Whole cell conductance normalized to maximum conductance of control
T220A NaChBac	Control		Shear			MSA model				MSO model
Voltage (mV)	Mean	SEM	Mean	SEM		Voltage (mV)	Po (0 mmHg)	Po (-30 mmHg)		Voltage (mV)	Po (0 mmHg)	Po (-30 mmHg)
-120	0.011605	0.002617	0.020924	0.008013		-120	1.01921e-07	2.77878e-06		-120	1.01921e-07	2.37413e-07
-110	0.012139	0.003236	0.014261	0.005142		-119	1.57185e-07	4.24837e-06		-119	1.57185e-07	3.66142e-07
-100	0.016129	0.004489	0.017809	0.006502		-118	2.42225e-07	6.48395e-06		-118	2.42225e-07	5.64232e-07
-90	0.039601	0.010957	0.063272	0.02252		-117	3.72952e-07	9.87701e-06		-117	3.72952e-07	8.68745e-07
-80	0.179416	0.042575	0.34287	0.094422		-116	5.73683e-07	1.50139e-05		-116	5.73683e-07	1.33632e-06
-70	0.562769	0.107839	0.924141	0.15313		-115	8.81512e-07	2.2769e-05		-115	8.81512e-07	2.05337e-06
-60	0.84136	0.066775	1.27471	0.071632		-114	1.35292e-06	3.44409e-05		-114	1.35292e-06	3.15145e-06
-50	0.970419	0.017042	1.35668	0.079102		-113	2.0737e-06	5.19483e-05		-113	2.0737e-06	4.83041e-06
-40	0.995301	0.00371	1.33661	0.079604		-112	3.17385e-06	7.81103e-05		-112	3.17385e-06	7.39308e-06
-30	0.982535	0.003852	1.30337	0.079163		-111	4.84985e-06	0.000117045		-111	4.84985e-06	1.12971e-05
-20	0.975196	0.003605	1.28063	0.074182		-110	7.39767e-06	0.000174726		-110	7.39767e-06	1.72319e-05
-10	0.985318	0.003648	1.32604	0.076581		-109	1.12617e-05	0.000259756		-109	1.12617e-05	2.62325e-05
						-108	1.71066e-05	0.000384425		-108	1.71066e-05	3.98472e-05
						-107	2.59225e-05	0.000566128		-107	2.59225e-05	6.0382e-05
						-106	3.91772e-05	0.000829245		-106	3.91772e-05	9.12559e-05
						-105	5.90363e-05	0.00120757		-105	5.90363e-05	0.000137512
						-104	8.86756e-05	0.0017474		-104	8.86756e-05	0.000206545
						-103	0.000132725	0.00251126		-103	0.000132725	0.000309135
						-102	0.000197885	0.00358241		-102	0.000197885	0.00046088
						-101	0.000293783	0.00506988		-101	0.000293783	0.000684181
						-100	0.000434132	0.00711378		-100	0.000434132	0.00101093
						-99	0.000638286	0.00989056		-99	0.000638286	0.00148611
						-98	0.00093328	0.0136172		-98	0.00093328	0.00217246
						-97	0.00135645	0.0185535		-97	0.00135645	0.00315653
						-96	0.00195874	0.0250012		-96	0.00195874	0.00455605
						-95	0.00280865	0.0332981		-95	0.00280865	0.00652885
						-94	0.00399692	0.0438065		-94	0.00399692	0.00928292
						-93	0.00564173	0.0568947		-93	0.00564173	0.0130872
						-92	0.00789403	0.0729112		-92	0.00789403	0.0182816
						-91	0.0109425	0.0921539		-91	0.0109425	0.0252849
						-90	0.0150175	0.114837		-90	0.0150175	0.0345977
						-89	0.0203922	0.141058		-89	0.0203922	0.0467963
						-88	0.0273804	0.170775		-88	0.0273804	0.0625151
						-87	0.0363293	0.203793		-87	0.0363293	0.0824134
						-86	0.0476053	0.239764		-86	0.0476053	0.107124
						-85	0.0615735	0.278207		-85	0.0615735	0.137189
						-84	0.0785702	0.318539		-84	0.0785702	0.172982
						-83	0.0988705	0.360117		-83	0.0988705	0.214634
						-82	0.122656	0.402278		-82	0.122656	0.261979
						-81	0.149982	0.444384		-81	0.149982	0.314525
						-80	0.18076	0.485852		-80	0.18076	0.371467
						-79	0.214745	0.526183		-79	0.214745	0.431747
						-78	0.251546	0.564969		-78	0.251546	0.494144
						-77	0.290646	0.6019		-77	0.290646	0.55738
						-76	0.331439	0.636758		-76	0.331439	0.620226
						-75	0.37327	0.66941		-75	0.37327	0.681589
						-74	0.41548	0.699797		-74	0.41548	0.740567
						-73	0.457446	0.727915		-73	0.457446	0.796479
						-72	0.498608	0.753807		-72	0.498608	0.84886
						-71	0.538495	0.777553		-71	0.538495	0.897444
						-70	0.57673	0.799253		-70	0.57673	0.942131
						-69	0.613031	0.819024		-69	0.613031	0.982951
						-68	0.64721	0.836993		-68	0.64721	1.02003
						-67	0.679158	0.853289		-67	0.679158	1.05356
						-66	0.708832	0.868041		-66	0.708832	1.08378
						-65	0.736248	0.881375		-65	0.736248	1.11093
						-64	0.76146	0.893412		-64	0.76146	1.13528
						-63	0.784554	0.904266		-63	0.784554	1.15708
						-62	0.805637	0.914045		-62	0.805637	1.17658
						-61	0.824831	0.922847		-61	0.824831	1.19399
						-60	0.842263	0.930765		-60	0.842263	1.20955
						-59	0.858063	0.937884		-59	0.858063	1.22344
						-58	0.872358	0.944282		-58	0.872358	1.23584
						-57	0.885274	0.950029		-57	0.885274	1.2469
						-56	0.896929	0.95519		-56	0.896929	1.25677
						-55	0.907435	0.959822		-55	0.907435	1.26559
						-54	0.916898	0.963979		-54	0.916898	1.27346
						-53	0.925414	0.96771		-53	0.925414	1.28048
						-52	0.933074	0.971056		-52	0.933074	1.28676
						-51	0.939959	0.974057		-51	0.939959	1.29236
						-50	0.946146	0.976749		-50	0.946146	1.29737
						-49	0.951703	0.979162		-49	0.951703	1.30184
						-48	0.956692	0.981326		-48	0.956692	1.30584
						-47	0.961171	0.983266		-47	0.961171	1.30942
						-46	0.96519	0.985005		-46	0.96519	1.31262
						-45	0.968795	0.986564		-45	0.968795	1.31547
						-44	0.97203	0.987961		-44	0.97203	1.31803
						-43	0.974931	0.989213		-43	0.974931	1.32032
						-42	0.977532	0.990335		-42	0.977532	1.32236
						-41	0.979865	0.991341		-41	0.979865	1.32419
						-40	0.981956	0.992242		-40	0.981956	1.32583
						-39	0.983831	0.993049		-39	0.983831	1.3273
						-38	0.985511	0.993773		-38	0.985511	1.32861
						-37	0.987017	0.994421		-37	0.987017	1.32978
						-36	0.988367	0.995002		-36	0.988367	1.33084
						-35	0.989577	0.995523		-35	0.989577	1.33178
						-34	0.990662	0.995989		-34	0.990662	1.33262
						-33	0.991633	0.996407		-33	0.991633	1.33337
						-32	0.992504	0.996781		-32	0.992504	1.33405
						-31	0.993284	0.997117		-31	0.993284	1.33466
						-30	0.993983	0.997417		-30	0.993983	1.3352
						-29	0.99461	0.997686		-29	0.99461	1.33568
						-28	0.995171	0.997928		-28	0.995171	1.33612
						-27	0.995674	0.998144		-27	0.995674	1.33651
						-26	0.996125	0.998337		-26	0.996125	1.33685
						-25	0.996528	0.998511		-25	0.996528	1.33717
						-24	0.99689	0.998666		-24	0.99689	1.33745
						-23	0.997214	0.998805		-23	0.997214	1.3377
						-22	0.997505	0.99893		-22	0.997505	1.33792
						-21	0.997765	0.999042		-21	0.997765	1.33812
						-20	0.997998	0.999142		-20	0.997998	1.3383
						-19	0.998207	0.999231		-19	0.998207	1.33846
						-18	0.998394	0.999312		-18	0.998394	1.33861
						-17	0.998561	0.999384		-17	0.998561	1.33874
						-16	0.998711	0.999448		-16	0.998711	1.33885
						-15	0.998846	0.999506		-15	0.998846	1.33896
						-14	0.998966	0.999558		-14	0.998966	1.33905
						-13	0.999074	0.999604		-13	0.999074	1.33913
						-12	0.999171	0.999646		-12	0.999171	1.33921
						-11	0.999258	0.999683		-11	0.999258	1.33927
						-10	0.999335	0.999716		-10	0.999335	1.33933
						-9	0.999405	0.999746		-9	0.999405	1.33939
						-8	0.999467	0.999773		-8	0.999467	1.33943
						-7	0.999523	0.999797		-7	0.999523	1.33948
						-6	0.999573	0.999818		-6	0.999573	1.33952
						-5	0.999618	0.999837		-5	0.999618	1.33955
						-4	0.999658	0.999855		-4	0.999658	1.33958
						-3	0.999694	0.99987		-3	0.999694	1.33961
						-2	0.999726	0.999884		-2	0.999726	1.33963
						-1	0.999755	0.999896		-1	0.999755	1.33966
						0	0.99978	0.999907		0	0.99978	1.33968
						1	0.999804	0.999917		1	0.999804	1.33969
						2	0.999824	0.999926		2	0.999824	1.33971
						3	0.999843	0.999934		3	0.999843	1.33972
						4	0.99986	0.999941		4	0.99986	1.33974
						5	0.999875	0.999948		5	0.999875	1.33975
						6	0.999888	0.999953		6	0.999888	1.33976
						7	0.9999	0.999959		7	0.9999	1.33977
						8	0.999911	0.999963		8	0.999911	1.33978
						9	0.99992	0.999967		9	0.99992	1.33978
						10	0.999929	0.999971		10	0.999929	1.33979
						11	0.999936	0.999974		11	0.999936	1.3398
						12	0.999943	0.999977		12	0.999943	1.3398
						13	0.99995	0.99998		13	0.99995	1.33981
						14	0.999955	0.999982		14	0.999955	1.33981
						15	0.99996	0.999984		15	0.99996	1.33981
						16	0.999964	0.999986		16	0.999964	1.33982
						17	0.999968	0.999988		17	0.999968	1.33982
						18	0.999972	0.99999		18	0.999972	1.33982
						19	0.999975	0.999991		19	0.999975	1.33983
						20	0.999978	0.999992		20	0.999978	1.33983
						21	0.999981	0.999993		21	0.999981	1.33983
						22	0.999983	0.999994		22	0.999983	1.33983
						23	0.999985	0.999995		23	0.999985	1.33983
						24	0.999987	0.999996		24	0.999987	1.33984
						25	0.999988	0.999997		25	0.999988	1.33984
						26	0.99999	0.999997		26	0.99999	1.33984
						27	0.999991	0.999998		27	0.999991	1.33984
						28	0.999992	0.999998		28	0.999992	1.33984
						29	0.999994	0.999999		29	0.999994	1.33984
						30	0.999995	0.999999		30	0.999995	1.33984
						31	0.999995	1		31	0.999995	1.33984
						32	0.999996	1		32	0.999996	1.33984
						33	0.999997	1		33	0.999997	1.33984
						34	0.999997	1		34	0.999997	1.33984
						35	0.999998	1		35	0.999998	1.33984
						36	0.999999	1		36	0.999999	1.33984
						37	0.999999	1		37	0.999999	1.33984
						38	0.999999	1		38	0.999999	1.33985
						39	1	1		39	1	1.33985
						40	1	1		40	1	1.33985

## Sheet: Figure 4C
Single channel open probability (Po)
T220A NaChBac	0 mmHg		-10 mmHg		-30 mmHg		-50 mmHg			MSA model						MSO model
Voltage (mV)	Mean	SEM	Mean	SEM	Mean	SEM	Mean	SEM		Voltage (mV)	0 mmHg	-10 mmHg)	-30 mmHg	-50 mmHg		Voltage (mV)	0 mmHg	-10 mmHg)	-30 mmHg	-50 mmHg
-100	0.0234477	0.0130153	0.0275718	0.0144687	0.057336	0.0358595	0.100572	0.0226166		-120	0.00131045	0.00197617	0.0040722	0.00762338		-120	0.00131045	0.00167895	0.00265934	0.00399975
-80	0.0191505	0.00546638	0.0241937	0.00894454	0.0613137	0.0303347	0.0742224	0.0266517		-119	0.00152886	0.0022744	0.00459312	0.00847672		-119	0.00152886	0.00195263	0.00307076	0.00458334
-60	0.175919	0.0437777	0.271475	0.0689354	0.315047	0.041534	0.340318	0.0434197		-118	0.00177427	0.00260644	0.00516547	0.00940489		-118	0.00177427	0.00225929	0.0035291	0.00522998
-40	0.353481	0.0713903	0.443402	0.0701032	0.539793	0.087137	0.5672	0.0517067		-117	0.00204902	0.00297507	0.00579308	0.0104127		-117	0.00204902	0.00260173	0.00403824	0.00594476
-20	0.524859	0.0669106	0.550533	0.0701917	0.688143	0.10228	0.785734	0.0823517		-116	0.00235561	0.00338326	0.00647999	0.0115052		-116	0.00235561	0.00298295	0.00460233	0.0067331
										-115	0.00269668	0.00383419	0.00723042	0.0126875		-115	0.00269668	0.00340615	0.00522579	0.00760074
										-114	0.00307509	0.0043312	0.00804875	0.013965		-114	0.00307509	0.00387475	0.00591331	0.00855376
										-113	0.00349386	0.00487783	0.00893959	0.0153429		-113	0.00349386	0.00439238	0.00666987	0.00959855
										-112	0.00395619	0.00547783	0.00990769	0.016827		-112	0.00395619	0.00496287	0.00750071	0.0107418
										-111	0.00446549	0.00613511	0.010958	0.0184226		-111	0.00446549	0.00559031	0.00841139	0.0119907
										-110	0.00502534	0.00685382	0.0120956	0.0201357		-110	0.00502534	0.00627897	0.0094077	0.0133524
										-109	0.00563954	0.00763825	0.0133256	0.0219717		-109	0.00563954	0.00703339	0.0104957	0.0148346
										-108	0.00631206	0.00849292	0.0146536	0.0239366		-108	0.00631206	0.0078583	0.0116818	0.0164453
										-107	0.00704708	0.00942248	0.0160848	0.0260359		-107	0.00704708	0.00875864	0.0129726	0.0181927
										-106	0.00784896	0.0104318	0.017625	0.0282755		-106	0.00784896	0.0097396	0.0143748	0.020085
										-105	0.00872224	0.0115259	0.0192797	0.0306608		-105	0.00872224	0.0108065	0.0158956	0.0221311
										-104	0.00967164	0.0127099	0.0210546	0.0331976		-104	0.00967164	0.011965	0.0175423	0.0243398
										-103	0.0107021	0.0139891	0.0229556	0.035891		-103	0.0107021	0.0132208	0.0193224	0.02672
										-102	0.0118185	0.0153689	0.0249882	0.0387465		-102	0.0118185	0.0145798	0.0212434	0.029281
										-101	0.0130263	0.016855	0.0271582	0.0417689		-101	0.0130263	0.0160481	0.0233133	0.0320319
										-100	0.0143306	0.0184527	0.0294713	0.0449632		-100	0.0143306	0.0176319	0.0255398	0.0349822
										-99	0.0157369	0.0201679	0.031933	0.0483338		-99	0.0157369	0.0193375	0.0279311	0.038141
										-98	0.0172508	0.0220063	0.0345489	0.051885		-98	0.0172508	0.0211714	0.0304952	0.0415178
										-97	0.018878	0.0239735	0.0373241	0.0556207		-97	0.018878	0.02314	0.0332401	0.0451217
										-96	0.020624	0.0260754	0.040264	0.0595444		-96	0.020624	0.02525	0.036174	0.0489618
										-95	0.0224946	0.0283175	0.0433733	0.0636593		-95	0.0224946	0.0275078	0.0393048	0.053047
										-94	0.0244955	0.0307056	0.0466568	0.0679678		-94	0.0244955	0.02992	0.0426405	0.0573861
										-93	0.0266326	0.0332451	0.0501189	0.0724724		-93	0.0266326	0.0324931	0.0461888	0.0619874
										-92	0.0289113	0.0359415	0.0537636	0.0771746		-92	0.0289113	0.0352336	0.0499573	0.0668589
										-91	0.0313374	0.0387999	0.0575946	0.0820755		-91	0.0313374	0.0381476	0.0539533	0.0720083
										-90	0.0339164	0.0418254	0.0616152	0.0871758		-90	0.0339164	0.0412414	0.0581838	0.0774428
										-89	0.0366535	0.0450229	0.0658284	0.0924754		-89	0.0366535	0.044521	0.0626556	0.0831689
										-88	0.039554	0.0483967	0.0702365	0.0979737		-88	0.039554	0.0479919	0.067375	0.0891927
										-87	0.0426228	0.0519513	0.0748414	0.103669		-87	0.0426228	0.0516598	0.0723477	0.0955195
										-86	0.0458648	0.0556904	0.0796447	0.109561		-86	0.0458648	0.0555296	0.0775792	0.102154
										-85	0.0492842	0.0596175	0.0846471	0.115645		-85	0.0492842	0.0596062	0.0830742	0.1091
										-84	0.0528854	0.0637359	0.0898489	0.121918		-84	0.0528854	0.0638939	0.088837	0.116361
										-83	0.056672	0.068048	0.0952497	0.128378		-83	0.056672	0.0683968	0.0948711	0.123939
										-82	0.0606476	0.0725561	0.100849	0.135019		-82	0.0606476	0.0731181	0.101179	0.131835
										-81	0.064815	0.0772619	0.106644	0.141835		-81	0.064815	0.0780609	0.107764	0.14005
										-80	0.0691768	0.0821665	0.112634	0.148822		-80	0.0691768	0.0832275	0.114626	0.148582
										-79	0.0737351	0.0872704	0.118815	0.155972		-79	0.0737351	0.0886198	0.121767	0.15743
										-78	0.0784914	0.0925736	0.125184	0.163277		-78	0.0784914	0.0942389	0.129185	0.166592
										-77	0.0834467	0.0980755	0.131736	0.170732		-77	0.0834467	0.100085	0.13688	0.176063
										-76	0.0886014	0.103775	0.138467	0.178326		-76	0.0886014	0.106159	0.144849	0.185838
										-75	0.0939553	0.109669	0.145371	0.186051		-75	0.0939553	0.112458	0.153089	0.195912
										-74	0.0995075	0.115757	0.152442	0.193897		-74	0.0995075	0.118983	0.161597	0.206276
										-73	0.105257	0.122034	0.159672	0.201854		-73	0.105257	0.125729	0.170368	0.216923
										-72	0.111201	0.128497	0.167054	0.209912		-72	0.111201	0.132695	0.179394	0.227843
										-71	0.117337	0.135141	0.174581	0.21806		-71	0.117337	0.139875	0.188671	0.239025
										-70	0.123662	0.141961	0.182243	0.226287		-70	0.123662	0.147267	0.198188	0.250458
										-69	0.130171	0.14895	0.190031	0.23458		-69	0.130171	0.154863	0.207939	0.262128
										-68	0.13686	0.156103	0.197935	0.242929		-68	0.13686	0.162658	0.217913	0.274024
										-67	0.143724	0.163412	0.205945	0.251321		-67	0.143724	0.170645	0.228099	0.286128
										-66	0.150756	0.170869	0.21405	0.259743		-66	0.150756	0.178816	0.238486	0.298427
										-65	0.157949	0.178465	0.222239	0.268184		-65	0.157949	0.187163	0.249061	0.310903
										-64	0.165296	0.186192	0.230501	0.27663		-64	0.165296	0.195676	0.259812	0.32354
										-63	0.172789	0.194041	0.238824	0.28507		-63	0.172789	0.204345	0.270724	0.33632
										-62	0.18042	0.202	0.247196	0.293492		-62	0.18042	0.213161	0.281783	0.349223
										-61	0.188179	0.21006	0.255605	0.301882		-61	0.188179	0.222112	0.292974	0.362232
										-60	0.196056	0.218209	0.264038	0.310229		-60	0.196056	0.231186	0.304281	0.375326
										-59	0.204042	0.226437	0.272484	0.318521		-59	0.204042	0.240371	0.315688	0.388486
										-58	0.212126	0.234732	0.280928	0.326746		-58	0.212126	0.249655	0.327177	0.401691
										-57	0.220297	0.243081	0.289361	0.334893		-57	0.220297	0.259024	0.338733	0.414922
										-56	0.228543	0.251473	0.297768	0.342952		-56	0.228543	0.268466	0.350337	0.428157
										-55	0.236852	0.259896	0.306137	0.350911		-55	0.236852	0.277966	0.361973	0.441377
										-54	0.245214	0.268337	0.314458	0.35876		-54	0.245214	0.287511	0.373623	0.454562
										-53	0.253615	0.276784	0.322717	0.366491		-53	0.253615	0.297086	0.385268	0.46769
										-52	0.262044	0.285224	0.330904	0.374093		-52	0.262044	0.306677	0.396892	0.480743
										-51	0.270487	0.293644	0.339008	0.381559		-51	0.270487	0.316271	0.408478	0.493701
										-50	0.278933	0.302034	0.347017	0.38888		-50	0.278933	0.325852	0.420007	0.506545
										-49	0.287369	0.31038	0.354921	0.396049		-49	0.287369	0.335407	0.431463	0.519256
										-48	0.295783	0.318671	0.362711	0.403059		-48	0.295783	0.344922	0.44283	0.531818
										-47	0.304163	0.326895	0.370378	0.409905		-47	0.304163	0.354382	0.454091	0.544212
										-46	0.312496	0.335041	0.377912	0.41658		-46	0.312496	0.363775	0.46523	0.556423
										-45	0.320771	0.343097	0.385305	0.42308		-45	0.320771	0.373088	0.476233	0.568435
										-44	0.328976	0.351055	0.392549	0.4294		-44	0.328976	0.382307	0.487085	0.580234
										-43	0.3371	0.358902	0.399638	0.435538		-43	0.3371	0.39142	0.497773	0.591806
										-42	0.345133	0.36663	0.406565	0.441489		-42	0.345133	0.400415	0.508283	0.603138
										-41	0.353063	0.37423	0.413325	0.447252		-41	0.353063	0.409281	0.518604	0.614219
										-40	0.360881	0.381693	0.419911	0.452826		-40	0.360881	0.418008	0.528723	0.625038
										-39	0.368577	0.389012	0.42632	0.458208		-39	0.368577	0.426584	0.53863	0.635585
										-38	0.376143	0.396178	0.432548	0.463399		-38	0.376143	0.435	0.548315	0.645853
										-37	0.38357	0.403185	0.438591	0.468398		-37	0.38357	0.443249	0.55777	0.655834
										-36	0.390851	0.410028	0.444447	0.473207		-36	0.390851	0.45132	0.566987	0.665521
										-35	0.397977	0.4167	0.450114	0.477826		-35	0.397977	0.459208	0.575959	0.67491
										-34	0.404943	0.423196	0.45559	0.482256		-34	0.404943	0.466904	0.584679	0.683996
										-33	0.411742	0.429513	0.460875	0.486501		-33	0.411742	0.474404	0.593143	0.692777
										-32	0.41837	0.435647	0.465968	0.490562		-32	0.41837	0.481702	0.601347	0.70125
										-31	0.424821	0.441596	0.47087	0.494442		-31	0.424821	0.488793	0.609287	0.709413
										-30	0.431092	0.447355	0.475582	0.498144		-30	0.431092	0.495674	0.61696	0.717268
										-29	0.437179	0.452925	0.480105	0.501672		-29	0.437179	0.502342	0.624365	0.724815
										-28	0.44308	0.458304	0.48444	0.50503		-28	0.44308	0.508793	0.631503	0.732056
										-27	0.448791	0.463492	0.488591	0.508222		-27	0.448791	0.515028	0.638371	0.738993
										-26	0.454313	0.468488	0.492559	0.511253		-26	0.454313	0.521044	0.644972	0.745629
										-25	0.459643	0.473293	0.496348	0.514126		-25	0.459643	0.526841	0.651307	0.751969
										-24	0.464781	0.477908	0.499962	0.516847		-24	0.464781	0.53242	0.657379	0.758017
										-23	0.469729	0.482335	0.503403	0.51942		-23	0.469729	0.537781	0.66319	0.763779
										-22	0.474485	0.486576	0.506676	0.521851		-22	0.474485	0.542927	0.668744	0.76926
										-21	0.479053	0.490634	0.509785	0.524144		-21	0.479053	0.547859	0.674045	0.774468
										-20	0.483432	0.49451	0.512735	0.526305		-20	0.483432	0.552579	0.679097	0.779408
										-19	0.487626	0.49821	0.51553	0.528339		-19	0.487626	0.557092	0.683907	0.784088
										-18	0.491638	0.501735	0.518175	0.53025		-18	0.491638	0.561399	0.688479	0.788517
										-17	0.495469	0.50509	0.520675	0.532045		-17	0.495469	0.565506	0.69282	0.792701
										-16	0.499123	0.508279	0.523035	0.533729		-16	0.499123	0.569417	0.696935	0.796649
										-15	0.502605	0.511306	0.52526	0.535305		-15	0.502605	0.573135	0.700832	0.800369
										-14	0.505917	0.514177	0.527356	0.53678		-14	0.505917	0.576666	0.704517	0.80387
										-13	0.509065	0.516895	0.529327	0.538159		-13	0.509065	0.580015	0.707996	0.807161
										-12	0.512052	0.519465	0.531178	0.539446		-12	0.512052	0.583188	0.711279	0.810249
										-11	0.514883	0.521894	0.532916	0.540645		-11	0.514883	0.586189	0.71437	0.813145
										-10	0.517563	0.524184	0.534544	0.541762		-10	0.517563	0.589025	0.717279	0.815855
										-9	0.520097	0.526343	0.536069	0.5428		-9	0.520097	0.591701	0.720012	0.818389
										-8	0.522489	0.528374	0.537494	0.543765		-8	0.522489	0.594223	0.722577	0.820755
										-7	0.524746	0.530284	0.538825	0.54466		-7	0.524746	0.596598	0.724981	0.822963
										-6	0.526872	0.532077	0.540067	0.545488		-6	0.526872	0.59883	0.727231	0.825018
										-5	0.528872	0.533758	0.541224	0.546255		-5	0.528872	0.600927	0.729335	0.826931
										-4	0.530751	0.535333	0.5423	0.546963		-4	0.530751	0.602893	0.731299	0.828708
										-3	0.532515	0.536806	0.5433	0.547616		-3	0.532515	0.604735	0.733132	0.830357
										-2	0.534169	0.538183	0.544229	0.548217		-2	0.534169	0.606459	0.734839	0.831885
										-1	0.535717	0.539468	0.54509	0.548769		-1	0.535717	0.60807	0.736427	0.8333
										0	0.537166	0.540666	0.545886	0.549276		0	0.537166	0.609573	0.737904	0.834608
										1	0.538519	0.541781	0.546623	0.549739		1	0.538519	0.610976	0.739274	0.835815
										2	0.539781	0.542819	0.547302	0.550163		2	0.539781	0.612281	0.740544	0.836928
										3	0.540958	0.543782	0.547928	0.55055		3	0.540958	0.613496	0.741719	0.837952
										4	0.542053	0.544675	0.548504	0.550902		4	0.542053	0.614624	0.742806	0.838894
										5	0.543071	0.545503	0.549032	0.551222		5	0.543071	0.615671	0.743809	0.839757
										6	0.544016	0.546268	0.549517	0.551513		6	0.544016	0.61664	0.744734	0.840547
										7	0.544892	0.546975	0.54996	0.551776		7	0.544892	0.617537	0.745585	0.841269
										8	0.545704	0.547627	0.550365	0.552014		8	0.545704	0.618366	0.746367	0.841927
										9	0.546454	0.548227	0.550733	0.55223		9	0.546454	0.619131	0.747083	0.842524
										10	0.547146	0.548779	0.551069	0.552424		10	0.547146	0.619835	0.747738	0.843066
										11	0.547785	0.549284	0.551374	0.552599		11	0.547785	0.620482	0.748337	0.843555
										12	0.548372	0.549747	0.55165	0.552757		12	0.548372	0.621076	0.748881	0.843996
										13	0.548912	0.550171	0.5519	0.5529		13	0.548912	0.62162	0.749376	0.844392
										14	0.549406	0.550557	0.552127	0.553028		14	0.549406	0.622117	0.749825	0.844747
										15	0.549859	0.550908	0.552331	0.553143		15	0.549859	0.62257	0.750231	0.845064
										16	0.550272	0.551228	0.552516	0.553246		16	0.550272	0.622983	0.750597	0.845348
										17	0.550649	0.551518	0.552682	0.553339		17	0.550649	0.623358	0.750927	0.8456
										18	0.550992	0.551781	0.552832	0.553422		18	0.550992	0.623698	0.751224	0.845825
										19	0.551304	0.552018	0.552966	0.553497		19	0.551304	0.624006	0.751491	0.846026
										20	0.551587	0.552233	0.553088	0.553565		20	0.551587	0.624285	0.75173	0.846204
										21	0.551843	0.552427	0.553197	0.553625		21	0.551843	0.624536	0.751944	0.846362
										22	0.552075	0.552602	0.553295	0.553679		22	0.552075	0.624763	0.752136	0.846503
										23	0.552285	0.55276	0.553383	0.553728		23	0.552285	0.624968	0.752308	0.846628
										24	0.552474	0.552902	0.553462	0.553771		24	0.552474	0.625152	0.752462	0.846739
										25	0.552644	0.55303	0.553532	0.55381		25	0.552644	0.625317	0.752599	0.846838
										26	0.552798	0.553145	0.553596	0.553845		26	0.552798	0.625466	0.752722	0.846926
										27	0.552936	0.553248	0.553653	0.553876		27	0.552936	0.625599	0.752832	0.847005
										28	0.55306	0.553341	0.553704	0.553905		28	0.55306	0.625719	0.75293	0.847075
										29	0.553172	0.553424	0.55375	0.55393		29	0.553172	0.625827	0.753018	0.847137
										30	0.553272	0.553499	0.553791	0.553952		30	0.553272	0.625923	0.753097	0.847193
										31	0.553363	0.553566	0.553828	0.553973		31	0.553363	0.62601	0.753167	0.847242
										32	0.553444	0.553626	0.553862	0.553991		32	0.553444	0.626087	0.75323	0.847287
										33	0.553516	0.55368	0.553891	0.554007		33	0.553516	0.626157	0.753286	0.847326
										34	0.553582	0.553728	0.553918	0.554022		34	0.553582	0.626219	0.753336	0.847361
										35	0.55364	0.553772	0.553942	0.554035		35	0.55364	0.626275	0.753381	0.847393
										36	0.553693	0.553811	0.553963	0.554046		36	0.553693	0.626325	0.753421	0.847421
										37	0.55374	0.553846	0.553982	0.554057		37	0.55374	0.62637	0.753457	0.847446
										38	0.553782	0.553877	0.553999	0.554066		38	0.553782	0.62641	0.75349	0.847468
										39	0.55382	0.553905	0.554015	0.554075		39	0.55382	0.626446	0.753518	0.847488
										40	0.553854	0.55393	0.554028	0.554082		40	0.553854	0.626479	0.753544	0.847506

## Sheet: Figure 4D
Single channel open probability (Po)
T220A NaChBac	-100 mV		-80 mV		-60 mV		-40 mV		-20 mV			MSA model							MSO model
Pressure (mmHg)	Mean	SEM	Mean	SEM	Mean	SEM	Mean	SEM	Mean	SEM		Pressure (mmHg)	-100 mV	-80 mV	-60 mV	-40 mV	-20 mV		Pressure (mmHg)	-100 mV	-80 mV	-60 mV	-40 mV	-20 mV
0	0.0234477	0.0130153	0.0191505	0.00546638	0.175919	0.0437777	0.353481	0.0713903	0.524859	0.0669106		-100	0.107935	0.257443	0.414777	0.510442	0.545269		-100	0.0633946	0.233976	0.521599	0.784613	0.916732
-10	0.0275718	0.0144687	0.0241937	0.00894454	0.271475	0.0689354	0.443402	0.0701032	0.550533	0.0701917		-99	0.106312	0.25513	0.412948	0.509614	0.545043		-99	0.0627749	0.232321	0.519152	0.782393	0.91516
-30	0.057336	0.0358595	0.124194	0.0556741	0.315047	0.041534	0.539793	0.087137	0.688143	0.10228		-98	0.104705	0.252819	0.411107	0.508774	0.544812		-98	0.0621569	0.230663	0.516686	0.780141	0.913553
-50	0.100572	0.0226166	0.147869	0.0215024	0.340318	0.0434197	0.5672	0.0517067	0.785734	0.0823517		-97	0.103112	0.25051	0.409252	0.507922	0.544576		-97	0.0615408	0.229003	0.514202	0.777856	0.911911
												-96	0.101534	0.248204	0.407385	0.507057	0.544336		-96	0.0609265	0.22734	0.5117	0.775539	0.910232
												-95	0.0999705	0.2459	0.405506	0.506181	0.54409		-95	0.060314	0.225673	0.509179	0.773188	0.908517
												-94	0.0984221	0.243599	0.403613	0.505292	0.543839		-94	0.0597034	0.224004	0.50664	0.770803	0.906763
												-93	0.0968885	0.241301	0.401708	0.50439	0.543583		-93	0.0590946	0.222333	0.504082	0.768384	0.904971
												-92	0.0953698	0.239007	0.399791	0.503476	0.543321		-92	0.0584878	0.220658	0.501505	0.76593	0.90314
												-91	0.0938661	0.236716	0.397862	0.502549	0.543055		-91	0.0578828	0.218981	0.498909	0.76344	0.901268
												-90	0.0923773	0.234429	0.39592	0.50161	0.542782		-90	0.0572798	0.217301	0.496294	0.760914	0.899356
												-89	0.0909034	0.232146	0.393967	0.500657	0.542504		-89	0.0566787	0.215618	0.49366	0.758352	0.897401
												-88	0.0894446	0.229868	0.392001	0.499692	0.542221		-88	0.0560795	0.213933	0.491007	0.755753	0.895404
												-87	0.0880008	0.227595	0.390024	0.498713	0.541931		-87	0.0554823	0.212245	0.488334	0.753117	0.893364
												-86	0.0865721	0.225326	0.388036	0.497722	0.541636		-86	0.0548872	0.210554	0.485641	0.750442	0.891279
												-85	0.0851583	0.223062	0.386036	0.496718	0.541335		-85	0.054294	0.208861	0.482929	0.747729	0.889149
												-84	0.0837596	0.220804	0.384025	0.4957	0.541028		-84	0.0537028	0.207166	0.480197	0.744977	0.886973
												-83	0.0823759	0.218552	0.382002	0.494669	0.540714		-83	0.0531137	0.205468	0.477445	0.742185	0.88475
												-82	0.0810073	0.216305	0.379969	0.493624	0.540395		-82	0.0525266	0.203767	0.474673	0.739353	0.882479
												-81	0.0796536	0.214065	0.377925	0.492566	0.540069		-81	0.0519417	0.202065	0.471881	0.736481	0.880159
												-80	0.078315	0.211831	0.375871	0.491495	0.539737		-80	0.0513588	0.20036	0.469069	0.733568	0.87779
												-79	0.0769914	0.209603	0.373805	0.49041	0.539398		-79	0.0507781	0.198652	0.466237	0.730613	0.875371
												-78	0.0756828	0.207382	0.37173	0.489311	0.539053		-78	0.0501995	0.196943	0.463384	0.727617	0.8729
												-77	0.0743891	0.205168	0.369645	0.488199	0.538701		-77	0.0496231	0.195232	0.460511	0.724577	0.870377
												-76	0.0731103	0.202962	0.367549	0.487073	0.538342		-76	0.0490489	0.193518	0.457617	0.721495	0.867801
												-75	0.0718465	0.200763	0.365444	0.485933	0.537976		-75	0.0484769	0.191803	0.454704	0.71837	0.865171
												-74	0.0705976	0.198572	0.363329	0.484779	0.537604		-74	0.0479071	0.190085	0.451769	0.7152	0.862486
												-73	0.0693635	0.196388	0.361205	0.483611	0.537224		-73	0.0473397	0.188366	0.448814	0.711987	0.859745
												-72	0.0681443	0.194213	0.359072	0.48243	0.536837		-72	0.0467745	0.186645	0.445839	0.708728	0.856948
												-71	0.0669398	0.192046	0.35693	0.481234	0.536443		-71	0.0462116	0.184923	0.442843	0.705425	0.854093
												-70	0.06575	0.189888	0.354779	0.480024	0.536042		-70	0.0456511	0.183199	0.439827	0.702076	0.85118
												-69	0.064575	0.187738	0.352619	0.4788	0.535633		-69	0.045093	0.181474	0.43679	0.69868	0.848207
												-68	0.0634146	0.185598	0.350451	0.477562	0.535216		-68	0.0445373	0.179747	0.433733	0.695239	0.845175
												-67	0.0622688	0.183466	0.348274	0.47631	0.534792		-67	0.043984	0.178019	0.430655	0.691751	0.842081
												-66	0.0611375	0.181344	0.34609	0.475043	0.53436		-66	0.0434332	0.17629	0.427557	0.688215	0.838926
												-65	0.0600207	0.179232	0.343898	0.473763	0.53392		-65	0.0428849	0.17456	0.424439	0.684632	0.835707
												-64	0.0589184	0.177129	0.341698	0.472468	0.533473		-64	0.0423391	0.172829	0.421301	0.681002	0.832426
												-63	0.0578304	0.175037	0.339491	0.471158	0.533017		-63	0.0417959	0.171097	0.418142	0.677323	0.82908
												-62	0.0567568	0.172954	0.337277	0.469835	0.532552		-62	0.0412553	0.169365	0.414964	0.673597	0.825669
												-61	0.0556974	0.170882	0.335055	0.468496	0.53208		-61	0.0407173	0.167632	0.411766	0.669821	0.822192
												-60	0.0546521	0.168821	0.332828	0.467144	0.531599		-60	0.0401819	0.165899	0.408548	0.665997	0.818649
												-59	0.053621	0.16677	0.330593	0.465777	0.53111		-59	0.0396492	0.164166	0.40531	0.662123	0.815038
												-58	0.0526039	0.16473	0.328352	0.464396	0.530612		-58	0.0391193	0.162432	0.402053	0.658201	0.811359
												-57	0.0516008	0.162701	0.326106	0.463	0.530105		-57	0.0385921	0.160699	0.398777	0.654229	0.807612
												-56	0.0506115	0.160683	0.323853	0.46159	0.52959		-56	0.0380677	0.158966	0.395482	0.650208	0.803795
												-55	0.0496361	0.158677	0.321595	0.460165	0.529065		-55	0.0375462	0.157233	0.392168	0.646137	0.799909
												-54	0.0486744	0.156682	0.319331	0.458726	0.528532		-54	0.0370275	0.155501	0.388835	0.642016	0.795952
												-53	0.0477263	0.154699	0.317063	0.457273	0.527989		-53	0.0365117	0.15377	0.385485	0.637846	0.791924
												-52	0.0467918	0.152728	0.314789	0.455805	0.527437		-52	0.0359989	0.152039	0.382116	0.633626	0.787824
												-51	0.0458708	0.150769	0.312511	0.454322	0.526876		-51	0.035489	0.15031	0.37873	0.629357	0.783652
												-50	0.0449632	0.148822	0.310229	0.452826	0.526305		-50	0.0349822	0.148582	0.375326	0.625038	0.779408
												-49	0.0440688	0.146887	0.307942	0.451315	0.525724		-49	0.0344784	0.146855	0.371905	0.620669	0.775091
												-48	0.0431877	0.144965	0.305652	0.449789	0.525134		-48	0.0339777	0.145131	0.368468	0.616251	0.770701
												-47	0.0423196	0.143055	0.303357	0.448249	0.524534		-47	0.0334801	0.143408	0.365014	0.611784	0.766237
												-46	0.0414646	0.141158	0.30106	0.446695	0.523925		-46	0.0329857	0.141687	0.361544	0.607268	0.761699
												-45	0.0406225	0.139274	0.298759	0.445126	0.523305		-45	0.0324946	0.139968	0.358059	0.602703	0.757088
												-44	0.0397932	0.137403	0.296455	0.443543	0.522675		-44	0.0320066	0.138252	0.354559	0.59809	0.752402
												-43	0.0389767	0.135545	0.294149	0.441946	0.522035		-43	0.031522	0.136539	0.351045	0.593429	0.747643
												-42	0.0381727	0.133701	0.29184	0.440335	0.521384		-42	0.0310407	0.134828	0.347516	0.588721	0.742809
												-41	0.0373813	0.131869	0.289529	0.43871	0.520723		-41	0.0305628	0.133121	0.343974	0.583965	0.737901
												-40	0.0366023	0.130051	0.287216	0.43707	0.520052		-40	0.0300883	0.131418	0.340418	0.579163	0.732919
												-39	0.0358356	0.128247	0.284902	0.435417	0.51937		-39	0.0296172	0.129718	0.336851	0.574315	0.727863
												-38	0.0350811	0.126456	0.282586	0.433749	0.518677		-38	0.0291497	0.128022	0.333271	0.569421	0.722733
												-37	0.0343387	0.124679	0.280269	0.432067	0.517973		-37	0.0286856	0.12633	0.32968	0.564482	0.71753
												-36	0.0336082	0.122916	0.277951	0.430372	0.517259		-36	0.0282252	0.124643	0.326078	0.5595	0.712255
												-35	0.0328897	0.121167	0.275632	0.428663	0.516533		-35	0.0277684	0.12296	0.322467	0.554474	0.706906
												-34	0.0321829	0.119432	0.273313	0.42694	0.515796		-34	0.0273152	0.121282	0.318845	0.549405	0.701486
												-33	0.0314878	0.117711	0.270994	0.425203	0.515048		-33	0.0268657	0.11961	0.315216	0.544294	0.695994
												-32	0.0308042	0.116005	0.268675	0.423452	0.514288		-32	0.02642	0.117943	0.311578	0.539143	0.690431
												-31	0.0301321	0.114312	0.266356	0.421688	0.513517		-31	0.025978	0.116281	0.307933	0.533952	0.684799
												-30	0.0294713	0.112634	0.264038	0.419911	0.512735		-30	0.0255398	0.114626	0.304281	0.528723	0.679097
												-29	0.0288217	0.11097	0.261721	0.41812	0.511941		-29	0.0251055	0.112977	0.300624	0.523455	0.673328
												-28	0.0281831	0.109321	0.259405	0.416316	0.511135		-28	0.0246751	0.111335	0.296961	0.518151	0.667491
												-27	0.0275556	0.107687	0.257091	0.414499	0.510317		-27	0.0242486	0.1097	0.293295	0.512811	0.661587
												-26	0.0269389	0.106067	0.254778	0.412669	0.509487		-26	0.0238261	0.108071	0.289625	0.507437	0.655619
												-25	0.0263329	0.104461	0.252467	0.410825	0.508645		-25	0.0234076	0.106451	0.285953	0.502031	0.649588
												-24	0.0257376	0.102871	0.250159	0.408969	0.507791		-24	0.0229931	0.104838	0.282279	0.496592	0.643494
												-23	0.0251528	0.101295	0.247853	0.4071	0.506925		-23	0.0225827	0.103233	0.278604	0.491124	0.637339
												-22	0.0245784	0.0997337	0.245549	0.405218	0.506046		-22	0.0221764	0.101636	0.274929	0.485627	0.631124
												-21	0.0240142	0.0981875	0.243249	0.403324	0.505155		-21	0.0217742	0.100048	0.271256	0.480102	0.624852
												-20	0.0234602	0.0966562	0.240951	0.401417	0.504252		-20	0.0213762	0.0984685	0.267584	0.474552	0.618523
												-19	0.0229163	0.0951398	0.238657	0.399498	0.503336		-19	0.0209825	0.0968985	0.263915	0.468978	0.612141
												-18	0.0223822	0.0936383	0.236367	0.397567	0.502407		-18	0.0205929	0.0953379	0.26025	0.463381	0.605705
												-17	0.021858	0.0921518	0.234081	0.395623	0.501465		-17	0.0202076	0.093787	0.25659	0.457764	0.59922
												-16	0.0213434	0.0906803	0.231799	0.393668	0.500511		-16	0.0198266	0.0922462	0.252936	0.452127	0.592685
												-15	0.0208384	0.0892237	0.229522	0.391701	0.499544		-15	0.0194499	0.0907157	0.249288	0.446473	0.586104
												-14	0.0203429	0.0877822	0.227249	0.389722	0.498563		-14	0.0190775	0.0891958	0.245648	0.440803	0.579479
												-13	0.0198566	0.0863557	0.224981	0.387732	0.49757		-13	0.0187095	0.0876868	0.242017	0.43512	0.572811
												-12	0.0193796	0.0849443	0.222718	0.38573	0.496563		-12	0.0183459	0.0861889	0.238396	0.429425	0.566104
												-11	0.0189117	0.0835479	0.220461	0.383717	0.495544		-11	0.0179867	0.0847024	0.234785	0.42372	0.559359
												-10	0.0184527	0.0821665	0.218209	0.381693	0.49451		-10	0.0176319	0.0832275	0.231186	0.418008	0.552579
												-9	0.0180026	0.0808001	0.215964	0.379658	0.493464		-9	0.0172815	0.0817647	0.227599	0.412289	0.545767
												-8	0.0175612	0.0794488	0.213724	0.377613	0.492404		-8	0.0169356	0.080314	0.224027	0.406566	0.538925
												-7	0.0171285	0.0781124	0.211491	0.375557	0.49133		-7	0.0165942	0.0788758	0.220469	0.400841	0.532055
												-6	0.0167042	0.0767911	0.209264	0.37349	0.490243		-6	0.0162573	0.0774502	0.216926	0.395116	0.525161
												-5	0.0162883	0.0754847	0.207045	0.371413	0.489143		-5	0.0159249	0.0760377	0.213401	0.389393	0.518245
												-4	0.0158807	0.0741933	0.204832	0.369326	0.488028		-4	0.015597	0.0746383	0.209893	0.383674	0.511309
												-3	0.0154812	0.0729169	0.202626	0.367229	0.4869		-3	0.0152736	0.0732522	0.206403	0.377961	0.504358
												-2	0.0150898	0.0716553	0.200429	0.365123	0.485758		-2	0.0149547	0.0718799	0.202933	0.372257	0.497392
												-1	0.0147063	0.0704087	0.198239	0.363006	0.484602		-1	0.0146404	0.0705213	0.199484	0.366563	0.490416
												0	0.0143306	0.0691768	0.196056	0.360881	0.483432		0	0.0143306	0.0691768	0.196056	0.360881	0.483432
												1	0.0139625	0.0679598	0.193882	0.358746	0.482248		1	0.0140253	0.0678466	0.192651	0.355214	0.476443
												2	0.0136021	0.0667576	0.191717	0.356603	0.481051		2	0.0137246	0.0665308	0.189269	0.349563	0.469453
												3	0.0132491	0.0655701	0.18956	0.35445	0.479839		3	0.0134283	0.0652296	0.185911	0.34393	0.462463
												4	0.0129035	0.0643973	0.187412	0.352289	0.478613		4	0.0131366	0.0639433	0.182579	0.338318	0.455477
												5	0.0125651	0.0632391	0.185273	0.35012	0.477372		5	0.0128495	0.0626719	0.179272	0.332729	0.448497
												6	0.0122338	0.0620955	0.183143	0.347942	0.476118		6	0.0125668	0.0614156	0.175992	0.327164	0.441528
												7	0.0119096	0.0609665	0.181022	0.345757	0.474849		7	0.0122887	0.0601746	0.17274	0.321626	0.434571
												8	0.0115923	0.0598519	0.178911	0.343563	0.473566		8	0.012015	0.058949	0.169516	0.316116	0.42763
												9	0.0112817	0.0587517	0.17681	0.341362	0.472269		9	0.0117458	0.0577389	0.166321	0.310636	0.420707
												10	0.0109779	0.057666	0.174719	0.339154	0.470958		10	0.011481	0.0565445	0.163156	0.305189	0.413806
												11	0.0106806	0.0565945	0.172638	0.336939	0.469632		11	0.0112208	0.0553659	0.160022	0.299776	0.406929
												12	0.0103898	0.0555372	0.170568	0.334717	0.468291		12	0.0109649	0.0542031	0.156919	0.294399	0.400079
												13	0.0101054	0.0544941	0.168508	0.332488	0.466937		13	0.0107134	0.0530563	0.153848	0.289059	0.393258
												14	0.00982729	0.0534652	0.166458	0.330252	0.465568		14	0.0104663	0.0519255	0.15081	0.283759	0.38647
												15	0.00955531	0.0524502	0.16442	0.328011	0.464184		15	0.0102236	0.0508109	0.147805	0.2785	0.379717
												16	0.0092894	0.0514492	0.162393	0.325763	0.462786		16	0.00998519	0.0497124	0.144834	0.273284	0.373002
												17	0.00902944	0.0504621	0.160377	0.323509	0.461374		17	0.00975109	0.0486301	0.141897	0.268112	0.366327
												18	0.00877534	0.0494887	0.158372	0.32125	0.459947		18	0.00952127	0.047564	0.138995	0.262985	0.359696
												19	0.008527	0.0485291	0.156379	0.318986	0.458506		19	0.00929568	0.0465143	0.136129	0.257906	0.353109
												20	0.00828432	0.0475831	0.154398	0.316717	0.45705		20	0.00907431	0.0454808	0.133298	0.252875	0.34657
												21	0.0080472	0.0466507	0.152429	0.314443	0.45558		21	0.00885712	0.0444637	0.130504	0.247895	0.340081
												22	0.00781554	0.0457317	0.150471	0.312164	0.454095		22	0.00864408	0.0434628	0.127746	0.242965	0.333644
												23	0.00758925	0.0448261	0.148526	0.309881	0.452596		23	0.00843513	0.0424783	0.125025	0.238089	0.327262
												24	0.00736823	0.0439338	0.146593	0.307593	0.451083		24	0.00823026	0.04151	0.122341	0.233265	0.320936
												25	0.00715239	0.0430546	0.144673	0.305302	0.449555		25	0.00802942	0.040558	0.119695	0.228497	0.314668
												26	0.00694164	0.0421886	0.142765	0.303008	0.448013		26	0.00783257	0.0396222	0.117087	0.223785	0.308461
												27	0.00673587	0.0413355	0.140871	0.300709	0.446457		27	0.00763968	0.0387025	0.114517	0.219129	0.302316
												28	0.00653501	0.0404954	0.138988	0.298408	0.444886		28	0.00745069	0.0377989	0.111985	0.214531	0.296234
												29	0.00633895	0.039668	0.137119	0.296104	0.443301		29	0.00726556	0.0369114	0.109492	0.209991	0.290219
												30	0.00614762	0.0388534	0.135263	0.293797	0.441702		30	0.00708425	0.0360398	0.107037	0.205511	0.28427
												31	0.00596092	0.0380514	0.133421	0.291488	0.440089		31	0.00690673	0.0351841	0.104621	0.201091	0.27839
												32	0.00577877	0.0372618	0.131591	0.289177	0.438461		32	0.00673293	0.0343442	0.102244	0.196731	0.27258
												33	0.00560108	0.0364847	0.129776	0.286864	0.436819		33	0.00656281	0.03352	0.0999049	0.192433	0.266841
												34	0.00542777	0.0357199	0.127973	0.284549	0.435163		34	0.00639633	0.0327114	0.0976051	0.188197	0.261174
												35	0.00525875	0.0349672	0.126185	0.282233	0.433494		35	0.00623344	0.0319182	0.095344	0.184023	0.255581
												36	0.00509394	0.0342266	0.12441	0.279916	0.43181		36	0.00607408	0.0311404	0.0931217	0.179911	0.250063
												37	0.00493327	0.033498	0.122649	0.277597	0.430112		37	0.00591822	0.0303778	0.090938	0.175863	0.24462
												38	0.00477664	0.0327813	0.120902	0.275279	0.428401		38	0.00576579	0.0296303	0.0887928	0.171878	0.239253
												39	0.00462398	0.0320763	0.119169	0.27296	0.426676		39	0.00561676	0.0288977	0.0866861	0.167956	0.233963
												40	0.00447521	0.0313829	0.11745	0.270641	0.424937		40	0.00547106	0.02818	0.0846177	0.164098	0.228751
												41	0.00433025	0.0307011	0.115746	0.268322	0.423185		41	0.00532865	0.0274769	0.0825874	0.160304	0.223618
												42	0.00418904	0.0300307	0.114056	0.266003	0.421419		42	0.00518948	0.0267883	0.0805949	0.156574	0.218563
												43	0.00405149	0.0293716	0.11238	0.263685	0.419639		43	0.0050535	0.026114	0.0786402	0.152907	0.213588
												44	0.00391752	0.0287237	0.110718	0.261369	0.417846		44	0.00492064	0.0254539	0.0767229	0.149305	0.208692
												45	0.00378708	0.0280868	0.109071	0.259053	0.41604		45	0.00479087	0.0248079	0.0748428	0.145766	0.203875
												46	0.00366008	0.0274609	0.107439	0.256739	0.414221		46	0.00466413	0.0241756	0.0729996	0.14229	0.199139
												47	0.00353646	0.0268459	0.105821	0.254426	0.412389		47	0.00454037	0.0235571	0.0711931	0.138878	0.194483
												48	0.00341615	0.0262416	0.104218	0.252116	0.410543		48	0.00441954	0.022952	0.0694228	0.135529	0.189907
												49	0.00329907	0.0256479	0.10263	0.249807	0.408685		49	0.00430158	0.0223602	0.0676884	0.132242	0.185411
												50	0.00318517	0.0250646	0.101056	0.247502	0.406814		50	0.00418644	0.0217815	0.0659897	0.129018	0.180995
												51	0.00307437	0.0244918	0.0994973	0.245199	0.40493		51	0.00407407	0.0212157	0.0643262	0.125857	0.176658
												52	0.00296661	0.0239292	0.0979533	0.242898	0.403034		52	0.00396442	0.0206627	0.0626976	0.122756	0.172401
												53	0.00286183	0.0233767	0.0964243	0.240602	0.401126		53	0.00385745	0.0201223	0.0611035	0.119717	0.168224
												54	0.00275996	0.0228343	0.0949101	0.238308	0.399205		54	0.00375309	0.0195941	0.0595434	0.116739	0.164125
												55	0.00266094	0.0223017	0.0934109	0.236019	0.397271		55	0.00365129	0.0190782	0.058017	0.113821	0.160105
												56	0.00256472	0.021779	0.0919267	0.233733	0.395326		56	0.00355202	0.0185742	0.0565238	0.110963	0.156162
												57	0.00247122	0.0212659	0.0904574	0.231452	0.393369		57	0.00345521	0.0180819	0.0550634	0.108163	0.152297
												58	0.0023804	0.0207623	0.0890032	0.229175	0.3914		58	0.00336082	0.0176012	0.0536354	0.105423	0.148509
												59	0.00229219	0.0202682	0.087564	0.226903	0.38942		59	0.00326879	0.0171319	0.0522392	0.10274	0.144798
												60	0.00220655	0.0197834	0.0861398	0.224636	0.387428		60	0.00317909	0.0166738	0.0508745	0.100114	0.141162
												61	0.0021234	0.0193078	0.0847306	0.222374	0.385424		61	0.00309166	0.0162266	0.0495408	0.0975448	0.1376
												62	0.0020427	0.0188412	0.0833365	0.220118	0.38341		62	0.00300645	0.0157902	0.0482377	0.0950315	0.134114
												63	0.0019644	0.0183836	0.0819574	0.217867	0.381384		63	0.00292341	0.0153644	0.0469645	0.0925734	0.1307
												64	0.00188843	0.0179348	0.0805933	0.215622	0.379348		64	0.00284251	0.014949	0.0457209	0.0901697	0.127359
												65	0.00181476	0.0174948	0.0792442	0.213383	0.3773		65	0.00276369	0.0145437	0.0445064	0.0878197	0.12409
												66	0.00174332	0.0170633	0.0779102	0.211151	0.375243		66	0.00268691	0.0141485	0.0433205	0.0855226	0.120892
												67	0.00167408	0.0166403	0.0765911	0.208926	0.373174		67	0.00261212	0.013763	0.0421627	0.0832777	0.117764
												68	0.00160697	0.0162257	0.0752871	0.206707	0.371096		68	0.00253928	0.0133871	0.0410326	0.0810841	0.114705
												69	0.00154195	0.0158193	0.073998	0.204495	0.369007		69	0.00246835	0.0130206	0.0399295	0.0789412	0.111715
												70	0.00147898	0.0154211	0.0727238	0.202291	0.366909		70	0.00239928	0.0126634	0.0388532	0.076848	0.108791
												71	0.00141801	0.0150309	0.0714645	0.200095	0.364801		71	0.00233202	0.0123152	0.0378029	0.0748038	0.105934
												72	0.00135899	0.0146486	0.0702201	0.197906	0.362683		72	0.00226655	0.0119758	0.0367784	0.0728078	0.103143
												73	0.00130187	0.014274	0.0689905	0.195725	0.360556		73	0.00220281	0.011645	0.035779	0.0708592	0.100415
												74	0.00124662	0.0139072	0.0677758	0.193552	0.35842		74	0.00214076	0.0113228	0.0348044	0.0689572	0.0977515
												75	0.00119319	0.0135479	0.0665758	0.191388	0.356275		75	0.00208037	0.0110088	0.033854	0.0671008	0.09515
												76	0.00114154	0.013196	0.0653905	0.189232	0.354122		76	0.0020216	0.0107029	0.0329273	0.0652894	0.0926097
												77	0.00109162	0.0128515	0.0642199	0.187085	0.351959		77	0.00196441	0.010405	0.0320239	0.0635221	0.0901298
												78	0.00104339	0.0125142	0.063064	0.184948	0.349789		78	0.00190875	0.0101148	0.0311432	0.0617981	0.0877091
												79	0.000996825	0.012184	0.0619226	0.182819	0.34761		79	0.0018546	0.00983221	0.0302849	0.0601165	0.0853466
												80	0.000951871	0.0118608	0.0607958	0.1807	0.345423		80	0.00180191	0.00955702	0.0294485	0.0584766	0.0830414
												81	0.000908493	0.0115445	0.0596834	0.178591	0.343228		81	0.00175066	0.00928908	0.0286335	0.0568775	0.0807922
												82	0.000866653	0.011235	0.0585854	0.176491	0.341026		82	0.0017008	0.00902822	0.0278394	0.0553184	0.0785982
												83	0.000826314	0.0109322	0.0575018	0.174401	0.338817		83	0.0016523	0.00877427	0.0270658	0.0537986	0.0764582
												84	0.000787437	0.0106359	0.0564325	0.172322	0.336601		84	0.00160512	0.00852707	0.0263122	0.0523171	0.0743712
												85	0.000749988	0.0103461	0.0553774	0.170253	0.334377		85	0.00155924	0.00828646	0.0255783	0.0508733	0.0723363
												86	0.00071393	0.0100627	0.0543365	0.168195	0.332148		86	0.00151462	0.0080523	0.0248635	0.0494664	0.0703523
												87	0.000679227	0.00978547	0.0533097	0.166147	0.329911		87	0.00147123	0.00782442	0.0241674	0.0480955	0.0684182
												88	0.000645846	0.00951442	0.0522968	0.164111	0.327669		88	0.00142904	0.00760268	0.0234897	0.0467599	0.0665331
												89	0.000613752	0.00924942	0.051298	0.162085	0.32542		89	0.00138802	0.00738692	0.0228299	0.0454589	0.0646959
												90	0.00058291	0.00899036	0.0503129	0.160071	0.323166		90	0.00134813	0.007177	0.0221876	0.0441916	0.0629056
												91	0.000553289	0.00873715	0.0493417	0.158068	0.320906		91	0.00130935	0.00697279	0.0215623	0.0429574	0.0611613
												92	0.000524855	0.00848968	0.0483842	0.156077	0.318641		92	0.00127165	0.00677413	0.0209537	0.0417555	0.0594619
												93	0.000497576	0.00824785	0.0474402	0.154097	0.316371		93	0.001235	0.0065809	0.0203614	0.0405852	0.0578065
												94	0.00047142	0.00801157	0.0465098	0.15213	0.314096		94	0.00119937	0.00639295	0.019785	0.0394457	0.0561941
												95	0.000446356	0.00778073	0.0455929	0.150174	0.311816		95	0.00116474	0.00621015	0.0192241	0.0383363	0.0546238
												96	0.000422352	0.00755525	0.0446893	0.148231	0.309533		96	0.00113109	0.00603238	0.0186784	0.0372565	0.0530946
												97	0.000399378	0.00733503	0.043799	0.1463	0.307245		97	0.00109837	0.00585951	0.0181475	0.0362053	0.0516056
												98	0.000377404	0.00711996	0.0429219	0.144382	0.304953		98	0.00106658	0.00569141	0.0176309	0.0351823	0.0501559
												99	0.000356401	0.00690997	0.0420578	0.142476	0.302658		99	0.00103569	0.00552797	0.0171285	0.0341867	0.0487446
												100	0.000336337	0.00670496	0.0412067	0.140583	0.300359		100	0.00100566	0.00536905	0.0166397	0.0332179	0.0473708

## Sheet: Figure 4E
Dwell times of single channel events									MSO model								Normalized values							Raw values
	Log(P(open))	Log(P(closed))			Log(P(open))	Log(P(closed))				Log(P(open))	Log(P(closed))			Log(P(open))	Log(P(closed))		∆Time constant (s-1)	∆k(closed)			∆k(open)			Time constant (s-1)	k(closed)			k(open)			Time constant (s-1)	k(closed)			k(open)
Bin center (ms)	0 mmHg	0 mmHg		Bin center (ms)	-50 mmHg	-50 mmHg			Bin center (ms)	0 mmHg	0 mmHg		Bin center (ms)	-50 mmHg	-50 mmHg		Pressure (mmHg)	Mean	SD	Pressure (mmHg)	Mean	SD		Pressure (mmHg)	Mean	SD	N	Mean	SD	N	Pressure (mmHg)	Mean	SD	N	Mean	SD	N
0.4	3.09136e-16	0.00935347		0.4	0	0.00439725			0.4	0.00672761	0.0150153		0.4	0.00553106	0.0229791		0	1	0.0466161	0	1	0.0456472		0	48.1284	2.24356	124	124.927	5.70257	124	0	101.405	6.84886	23	178.201	11.8598	23
0.478803	0.00226641	0.01393		0.485514	0	0.0106333			0.478803	0.00799344	0.0176763		0.485514	0.00667241	0.0271812		-10	1.0011	0.0480552	-10	1.15629	0.0525756		-10	48.1813	2.31282	113	144.452	6.56811	113	-50	87.5488	6.14186	23	217.023	14.7423	23
0.573132	0.0086732	0.018063		0.589311	0	0.0240712			0.573132	0.00948354	0.0207406		0.589311	0.00803871	0.0319749		-50	0.863358	0.0605676	-50	1.21786	0.0827285
0.686043	0.014869	0.0217227		0.715297	0.00132934	0.0368539			0.686043	0.0112318	0.0242408		0.715297	0.00966936	0.0373632
0.821199	0.0122761	0.0207882		0.868217	0.00633009	0.0451927			0.821199	0.0132744	0.0281987		0.868217	0.0116083	0.0433065
0.982982	0.0148229	0.036056		1.05383	0.0182207	0.0960451			0.982982	0.0156492	0.0326188		1.05383	0.0139034	0.0497031
1.17664	0.0268704	0.0671186		1.27912	0.0126588	0.0962925			1.17664	0.0183935	0.0374783		1.27912	0.0166049	0.0563665
1.40845	0.0342723	0.0723504		1.55258	0.00378926	0.07461			1.40845	0.0215416	0.042716		1.55258	0.0197628	0.0630028
1.68592	0.0168227	0.0642009		1.8845	0.0144802	0.0541128			1.68592	0.0251203	0.0482183		1.8845	0.0234227	0.0691921
2.01806	0.0121517	0.0793839		2.28738	0.0539368	0.0702547			2.01806	0.029143	0.0538047		2.28738	0.0276194	0.0743846
2.41564	0.030287	0.0503041		2.7764	0.066478	0.0762671			2.41564	0.0336023	0.0592145		2.7764	0.0323673	0.0779233
2.89154	0.0661819	0.0888075		3.36995	0.0605534	0.0703755			2.89154	0.0384594	0.0641002		3.36995	0.0376479	0.0791075
3.46119	0.0259887	0.0258592		4.0904	0.0786196	0.0563676			3.46119	0.043632	0.0680304		4.0904	0.0433932	0.0773103
4.14308	0.0404957	0.059441		4.96487	0.0300751	0.0869521			4.14308	0.0489804	0.0705139		4.96487	0.0494659	0.0721475
4.9593	0.0752946	0.0648958		6.02629	0.0535287	0.0324472			4.9593	0.0542941	0.0710492		6.02629	0.0556377	0.0636686
5.93632	0.0713503	0.0583342		7.31462	0.048	0.0696589			5.93632	0.0592815	0.0692073		7.31462	0.0615704	0.0525071
7.10582	0.0812455	0.0531659		8.87839	0.11175	0.0316836			7.10582	0.063567	0.0647405		8.87839	0.066805	0.0398932
8.50573	0.0687514	0.0383509		10.7765	0.0641393	0.0227273			8.50573	0.0667035	0.0577032		10.7765	0.0707711	0.0274462
10.1814	0.0937197	0.0373735		13.0803	0.0721108	0.0151515			10.1814	0.0682068	0.0485429		13.0803	0.0728289	0.016747
12.1873	0.0408868	0.0447925		15.8767	0.048	0.00757576			12.1873	0.0676186	0.0381123		15.8767	0.0723558	0.0088387
14.5882	0.0397168	0.026462		19.2709	0.048503	0.00757576			14.5882	0.0645999	0.0275547		19.2709	0.0688846	0.00391519
17.4622	0.0607415	0.0143819		23.3908	0.0634885	0.00757576			17.4622	0.0590449	0.0180541		23.3908	0.0622767	0.00140383
20.9024	0.0592574	0.00680272		28.3914	0.0480085	0			20.9024	0.0511877	0.0105184		28.3914	0.0528854	0.000390133
25.0204	0.0241794	0		34.4611	0.048	0			25.0204	0.0416587	0.00532719		34.4611	0.0416307	7.97713e-05
29.9496	0.0277838	0.00680272		41.8284	0.008	0			29.9496	0.0314386	0.00228332		41.8284	0.0298969	1.12752e-05
35.85	0.0148262	0.00680272		50.7707	0.008	0			35.85	0.021681	0.000802275		50.7707	0.0192137	1.02219e-06
42.9127	0.0143709	0.00680272		61.6247	0.008	0			42.9127	0.013427	0.000222526		61.6247	0.0107966	5.43182e-08
51.3669	0.00729927	0		74.7992	0.008	0			51.3669	0.00731402	4.65937e-05		74.7992	0.00515845	1.5173e-09
61.4865	0.00729927	0		90.7904	0.008	0			61.4865	0.00341906	6.9853e-06		90.7904	0.00202641	1.9519e-11
73.5999	0.00364569	0		110.2	0.00400112	0			73.5999	0.00133208	7.04236e-07		110.2	0.000628646	9.84067e-14

## Sheet: Figure 4F
Pressure (mmHg)	Time	Experimental time course (∆Po)	MSA model (∆Po)	MSO model (∆Po)
0	0	-0.00788238	0	-0.000100002
0	0.001	-0.00592704	0.000100002	-0.000100002
0	0.002	0.00375651	0.000100002	0
0	0.003	0.000357633	0.000100002	0
0	0.004	0.00181917	0.000100002	0
0	0.005	-0.000199692	0.000100002	0
0	0.006	-0.00358416	0.000100002	0
0	0.007	-0.01404	0.000200003	0
0	0.008	-0.0171	0.000200003	0.000100002
0	0.009	-0.00585099	0.000200003	0.000100002
0	0.01	-0.01107	0.000200003	0.000100002
0	0.011	-0.01476	0.000200003	0.000100002
0	0.012	-0.01854	0.000200003	0.000100002
0	0.013	-0.01026	0.000300005	0.000100002
0	0.014	-0.01017	0.000300005	0.000200003
0	0.015	-0.00288549	0.000300005	0.000200003
0	0.016	-0.00856755	0.000300005	0.000200003
0	0.017	-0.00614349	0.000300005	0.000200003
0	0.018	-0.01683	0.000300005	0.000200003
0	0.019	-0.00346941	0.000300005	0.000200003
0	0.02	-0.00540729	0.000400007	0.000200003
0	0.021	-0.00695223	0.000400007	0.000300005
0	0.022	-0.01089	0.000400007	0.000300005
0	0.023	-0.01008	0.000400007	0.000300005
0	0.024	0.00200736	0.000400007	0.000300005
0	0.025	-0.00563391	0.000400007	0.000300005
0	0.026	-0.00936	0.000400007	0.000300005
0	0.027	-0.00963	0.000500008	0.000300005
0	0.028	-0.01107	0.000500008	0.000400007
0	0.029	-0.00510435	0.000500008	0.000400007
0	0.03	-0.00315801	0.000500008	0.000400007
0	0.031	-0.00491769	0.000500008	0.000400007
0	0.032	-0.000256761	0.000500008	0.000400007
0	0.033	-0.00490905	0.000500008	0.000400007
0	0.034	-0.000647487	0.000500008	0.000400007
0	0.035	-0.0026973	0.000599995	0.000400007
0	0.036	-0.00335241	0.000599995	0.000499994
0	0.037	-0.00892422	0.000599995	0.000499994
0	0.038	-0.00640476	0.000599995	0.000499994
0	0.039	-0.00376461	0.000599995	0.000499994
0	0.04	-0.00618426	0.000599995	0.000499994
0	0.041	-0.01656	0.000599995	0.000499994
0	0.042	-0.01197	0.000599995	0.000499994
0	0.043	-0.00629604	0.000599995	0.000499994
0	0.044	-0.0099	0.000699997	0.000499994
0	0.045	-0.00297405	0.000699997	0.000599995
0	0.046	-0.00807552	0.000699997	0.000599995
0	0.047	-0.02007	0.000699997	0.000599995
0	0.048	-0.02115	0.000699997	0.000599995
0	0.049	-0.01647	0.000699997	0.000599995
0	0.05	-0.01836	0.000699997	0.000599995
0	0.051	-0.00589104	0.000699997	0.000599995
0	0.052	-0.00918	0.000699997	0.000599995
0	0.053	0.000180756	0.000699997	0.000599995
0	0.054	-0.00662706	0.000799999	0.000599995
0	0.055	-0.00634545	0.000799999	0.000699997
0	0.056	-0.0030798	0.000799999	0.000699997
0	0.057	-0.00176661	0.000799999	0.000699997
0	0.058	0.00334737	0.000799999	0.000699997
0	0.059	-0.00387504	0.000799999	0.000699997
0	0.06	0.00587799	0.000799999	0.000699997
0	0.061	0.00363339	0.000799999	0.000699997
0	0.062	-0.000342135	0.000799999	0.000699997
0	0.063	0.00116973	0.000799999	0.000699997
0	0.064	-0.00592506	0.000799999	0.000699997
0	0.065	-0.02088	0.0009	0.000699997
0	0.066	-0.02304	0.0009	0.000799999
0	0.067	-0.00755397	0.0009	0.000799999
0	0.068	0.00774981	0.0009	0.000799999
0	0.069	-0.00470772	0.0009	0.000799999
0	0.07	-0.01161	0.0009	0.000799999
0	0.071	0.00076527	0.0009	0.000799999
0	0.072	0.000399312	0.0009	0.000799999
0	0.073	0.00075429	0.0009	0.000799999
0	0.074	-0.00337752	0.0009	0.000799999
0	0.075	-0.00420714	0.0009	0.000799999
0	0.076	-0.00277362	0.0009	0.000799999
0	0.077	-0.0062442	0.001	0.000799999
0	0.078	-0.00275265	0.001	0.0009
0	0.079	0.00154971	0.001	0.0009
0	0.08	-0.01161	0.001	0.0009
0	0.081	-0.01629	0.001	0.0009
0	0.082	-0.00780507	0.001	0.0009
0	0.083	-0.01305	0.001	0.0009
0	0.084	-0.00695403	0.001	0.0009
0	0.085	-0.00552726	0.001	0.0009
0	0.086	-0.00195489	0.001	0.0009
0	0.087	-0.00216405	0.001	0.0009
0	0.088	-0.01053	0.001	0.0009
0	0.089	0.00140364	0.001	0.0009
0	0.09	-0.00198567	0.001	0.0009
0	0.091	0.00144009	0.001	0.0009
0	0.092	-0.00323919	0.0011	0.0009
0	0.093	0.00618615	0.0011	0.001
0	0.094	-0.00165069	0.0011	0.001
0	0.095	-0.00836406	0.0011	0.001
0	0.096	-0.01107	0.0011	0.001
0	0.097	-0.00981	0.0011	0.001
0	0.098	-0.01647	0.0011	0.001
0	0.099	-0.01656	0.0011	0.001
0	0.1	-0.01296	0.0011	0.001
0	0.101	0.01683	0.0011	0.001
0	0.102	0.01665	0.0011	0.001
0	0.103	0.01098	0.0011	0.001
0	0.104	0.00794826	0.0011	0.001
0	0.105	0.00412515	0.0011	0.001
0	0.106	0.00200007	0.0011	0.001
0	0.107	0.00552474	0.0011	0.001
0	0.108	0.00918	0.0011	0.001
0	0.109	0.00597528	0.00120001	0.001
0	0.11	0.000685332	0.00120001	0.0011
0	0.111	0.00441297	0.00120001	0.0011
0	0.112	0.01188	0.00120001	0.0011
0	0.113	0.0033282	0.00120001	0.0011
0	0.114	0.00317079	0.00120001	0.0011
0	0.115	-0.00472752	0.00120001	0.0011
0	0.116	-0.00224838	0.00120001	0.0011
0	0.117	-0.00615357	0.00120001	0.0011
0	0.118	-0.01386	0.00120001	0.0011
0	0.119	-0.00808434	0.00120001	0.0011
0	0.12	-0.01269	0.00120001	0.0011
0	0.121	-0.00981	0.00120001	0.0011
0	0.122	-0.00694719	0.00120001	0.0011
0	0.123	0.00268857	0.00120001	0.0011
0	0.124	0.01512	0.00120001	0.0011
0	0.125	0.01566	0.00120001	0.0011
0	0.126	0.00384732	0.00120001	0.0011
0	0.127	0.00680823	0.00120001	0.0011
0	0.128	0.0135	0.00120001	0.0011
0	0.129	0.00695304	0.00120001	0.0011
0	0.13	0.00475002	0.00130001	0.00120001
0	0.131	0.00582813	0.00130001	0.00120001
0	0.132	0.00702378	0.00130001	0.00120001
0	0.133	0.00595881	0.00130001	0.00120001
0	0.134	0.0084627	0.00130001	0.00120001
0	0.135	0.00532881	0.00130001	0.00120001
0	0.136	-0.00247851	0.00130001	0.00120001
0	0.137	-0.00199962	0.00130001	0.00120001
0	0.138	0.00241137	0.00130001	0.00120001
0	0.139	-0.00617157	0.00130001	0.00120001
0	0.14	0.00167319	0.00130001	0.00120001
0	0.141	0.00196794	0.00130001	0.00120001
0	0.142	0.00103599	0.00130001	0.00120001
0	0.143	0.0046656	0.00130001	0.00120001
0	0.144	0.00563211	0.00130001	0.00120001
0	0.145	0.00802305	0.00130001	0.00120001
0	0.146	0.01593	0.00130001	0.00120001
0	0.147	0.01917	0.00130001	0.00120001
0	0.148	0.00803943	0.00130001	0.00120001
0	0.149	0.00927	0.00130001	0.00120001
0	0.15	0.01071	0.00130001	0.00120001
0	0.151	0.01062	0.00130001	0.00120001
0	0.152	0.0041859	0.00130001	0.00120001
0	0.153	0.00444564	0.00130001	0.00120001
0	0.154	0.00427761	0.00130001	0.00120001
0	0.155	0.00515133	0.00130001	0.00120001
0	0.156	0.01071	0.00130001	0.00120001
0	0.157	0.00171945	0.00140001	0.00130001
0	0.158	-0.00701298	0.00140001	0.00130001
0	0.159	-0.00405549	0.00140001	0.00130001
0	0.16	-0.00646695	0.00140001	0.00130001
0	0.161	-0.01224	0.00140001	0.00130001
0	0.162	0.00129807	0.00140001	0.00130001
0	0.163	0.0038871	0.00140001	0.00130001
0	0.164	0.00228609	0.00140001	0.00130001
0	0.165	0.00112185	0.00140001	0.00130001
0	0.166	0.00927	0.00140001	0.00130001
0	0.167	0.0011358	0.00140001	0.00130001
0	0.168	-0.00182718	0.00140001	0.00130001
0	0.169	0.00115893	0.00140001	0.00130001
0	0.17	-0.0021051	0.00140001	0.00130001
0	0.171	-0.01035	0.00140001	0.00130001
0	0.172	-0.00823014	0.00140001	0.00130001
0	0.173	0.00644166	0.00140001	0.00130001
0	0.174	0.000650304	0.00140001	0.00130001
0	0.175	-0.00846261	0.00140001	0.00130001
0	0.176	-0.0065997	0.00140001	0.00130001
0	0.177	-0.01179	0.00140001	0.00130001
0	0.178	-0.00111195	0.00140001	0.00130001
0	0.179	-0.00219069	0.00140001	0.00130001
0	0.18	-0.00279729	0.00140001	0.00130001
0	0.181	-0.00142758	0.00140001	0.00130001
0	0.182	0.00169146	0.00140001	0.00130001
0	0.183	0.00661968	0.00140001	0.00130001
0	0.184	0.00512973	0.00140001	0.00130001
0	0.185	-0.00103365	0.00140001	0.00130001
0	0.186	-0.00757359	0.00140001	0.00130001
0	0.187	-0.00909	0.00140001	0.00130001
0	0.188	0.00419094	0.00140001	0.00130001
0	0.189	0.01998	0.00140001	0.00130001
0	0.19	0.01206	0.00140001	0.00130001
0	0.191	0.01296	0.00140001	0.00130001
0	0.192	0.0216	0.00140001	0.00130001
0	0.193	0.0252	0.00140001	0.00130001
0	0.194	0.01719	0.0015	0.00130001
0	0.195	0.00845532	0.0015	0.00139999
0	0.196	-0.00648999	0.0015	0.00139999
0	0.197	-0.0051318	0.0015	0.00139999
0	0.198	0.00100269	0.0015	0.00139999
0	0.199	0.00606519	0.0015	0.00139999
-30	0.2	-0.00220113	0.0015	0.0078
-30	0.201	-0.00635112	0.0016	0.0136
-30	0.202	0.01125	0.0018	0.0189
-30	0.203	0.01152	0.00210001	0.0238
-30	0.204	0.00321615	0.0024	0.0282
-30	0.205	0.00694827	0.0027	0.0322
-30	0.206	0.01629	0.00320001	0.0359
-30	0.207	0.03321	0.0036	0.0393
-30	0.208	0.03942	0.00410001	0.0424
-30	0.209	0.03969	0.0046	0.0453
-30	0.21	0.04203	0.0052	0.0479
-30	0.211	0.05247	0.00580001	0.0503
-30	0.212	0.06003	0.0064	0.0526
-30	0.213	0.06381	0.007	0.0546
-30	0.214	0.06696	0.0077	0.0565
-30	0.215	0.07614	0.00830001	0.0583
-30	0.216	0.063	0.009	0.0599
-30	0.217	0.06561	0.0097	0.0615
-30	0.218	0.07308	0.0104	0.0629
-30	0.219	0.06327	0.0112	0.0642
-30	0.22	0.0621	0.0119	0.0655
-30	0.221	0.05877	0.0126	0.0666
-30	0.222	0.05427	0.0134	0.0677
-30	0.223	0.06633	0.0141	0.0688
-30	0.224	0.0792	0.0149	0.0697
-30	0.225	0.0693	0.0156	0.0706
-30	0.226	0.0666	0.0164	0.0715
-30	0.227	0.06867	0.0171	0.0723
-30	0.228	0.06939	0.0179	0.0731
-30	0.229	0.08478	0.0186	0.0738
-30	0.23	0.07416	0.0194	0.0745
-30	0.231	0.07884	0.0201	0.0752
-30	0.232	0.06354	0.0209	0.0758
-30	0.233	0.06543	0.0216	0.0764
-30	0.234	0.06273	0.0223	0.077
-30	0.235	0.06966	0.0231	0.0776
-30	0.236	0.08793	0.0238	0.0781
-30	0.237	0.08469	0.0245	0.0786
-30	0.238	0.08037	0.0252	0.0791
-30	0.239	0.09252	0.0259	0.0796
-30	0.24	0.09648	0.0266	0.0801
-30	0.241	0.11862	0.0273	0.0805
-30	0.242	0.10854	0.028	0.081
-30	0.243	0.12141	0.0286	0.0814
-30	0.244	0.1152	0.0293	0.0818
-30	0.245	0.11052	0.03	0.0822
-30	0.246	0.09486	0.0306	0.0826
-30	0.247	0.08991	0.0313	0.083
-30	0.248	0.09342	0.0319	0.0833
-30	0.249	0.10962	0.0325	0.0837
-30	0.25	0.12087	0.0331	0.084
-30	0.251	0.12528	0.0337	0.0844
-30	0.252	0.11754	0.0343	0.0847
-30	0.253	0.1107	0.0349	0.085
-30	0.254	0.10656	0.0355	0.0853
-30	0.255	0.12087	0.0361	0.0856
-30	0.256	0.13212	0.0367	0.0859
-30	0.257	0.13626	0.0372	0.0862
-30	0.258	0.12771	0.0378	0.0865
-30	0.259	0.12609	0.0383	0.0868
-30	0.26	0.13203	0.0388	0.0871
-30	0.261	0.11898	0.0394	0.0874
-30	0.262	0.12816	0.0399	0.0876
-30	0.263	0.1278	0.0404	0.0879
-30	0.264	0.12555	0.0409	0.0881
-30	0.265	0.11493	0.0414	0.0884
-30	0.266	0.12798	0.0419	0.0886
-30	0.267	0.12042	0.0423	0.0889
-30	0.268	0.10431	0.0428	0.0891
-30	0.269	0.1044	0.0433	0.0894
-30	0.27	0.11583	0.0437	0.0896
-30	0.271	0.11331	0.0442	0.0898
-30	0.272	0.11187	0.0446	0.09
-30	0.273	0.10278	0.045	0.0903
-30	0.274	0.09018	0.0455	0.0905
-30	0.275	0.0882	0.0459	0.0907
-30	0.276	0.1017	0.0463	0.0909
-30	0.277	0.10287	0.0467	0.0911
-30	0.278	0.1107	0.0471	0.0913
-30	0.279	0.11718	0.0475	0.0915
-30	0.28	0.10701	0.0479	0.0917
-30	0.281	0.11142	0.0482	0.0919
-30	0.282	0.09837	0.0486	0.0921
-30	0.283	0.09117	0.049	0.0923
-30	0.284	0.09414	0.0493	0.0925
-30	0.285	0.09342	0.0497	0.0927
-30	0.286	0.09873	0.05	0.0929
-30	0.287	0.09774	0.0503	0.093
-30	0.288	0.09621	0.0507	0.0932
-30	0.289	0.09972	0.051	0.0934
-30	0.29	0.0918	0.0513	0.0936
-30	0.291	0.11601	0.0516	0.0937
-30	0.292	0.13014	0.052	0.0939
-30	0.293	0.12105	0.0523	0.0941
-30	0.294	0.11547	0.0526	0.0942
-30	0.295	0.13086	0.0529	0.0944
-30	0.296	0.13104	0.0531	0.0945
-30	0.297	0.12879	0.0534	0.0947
-30	0.298	0.10908	0.0537	0.0949
-30	0.299	0.11097	0.054	0.095
-30	0.3	0.10467	0.0542	0.0952
-30	0.301	0.09342	0.0545	0.0953
-30	0.302	0.08622	0.0548	0.0955
-30	0.303	0.1116	0.055	0.0956
-30	0.304	0.10548	0.0553	0.0957
-30	0.305	0.10503	0.0555	0.0959
-30	0.306	0.10008	0.0558	0.096
-30	0.307	0.10971	0.056	0.0962
-30	0.308	0.10656	0.0562	0.0963
-30	0.309	0.10701	0.0565	0.0964
-30	0.31	0.10656	0.0567	0.0966
-30	0.311	0.10269	0.0569	0.0967
-30	0.312	0.09225	0.0571	0.0968
-30	0.313	0.09738	0.0573	0.097
-30	0.314	0.10863	0.0575	0.0971
-30	0.315	0.11178	0.0577	0.0972
-30	0.316	0.11997	0.058	0.0973
-30	0.317	0.12123	0.0581	0.0975
-30	0.318	0.10503	0.0583	0.0976
-30	0.319	0.11916	0.0585	0.0977
-30	0.32	0.10269	0.0587	0.0978
-30	0.321	0.10593	0.0589	0.0979
-30	0.322	0.09153	0.0591	0.098
-30	0.323	0.09855	0.0593	0.0982
-30	0.324	0.10602	0.0594	0.0983
-30	0.325	0.09108	0.0596	0.0984
-30	0.326	0.1053	0.0598	0.0985
-30	0.327	0.1179	0.06	0.0986
-30	0.328	0.09828	0.0601	0.0987
-30	0.329	0.09594	0.0603	0.0988
-30	0.33	0.10656	0.0604	0.0989
-30	0.331	0.11511	0.0606	0.099
-30	0.332	0.12006	0.0607	0.0991
-30	0.333	0.10449	0.0609	0.0992
-30	0.334	0.13464	0.061	0.0993
-30	0.335	0.13752	0.0612	0.0994
-30	0.336	0.12879	0.0613	0.0995
-30	0.337	0.11637	0.0615	0.0996
-30	0.338	0.10575	0.0616	0.0997
-30	0.339	0.11727	0.0617	0.0998
-30	0.34	0.12861	0.0619	0.0999
-30	0.341	0.11241	0.062	0.1
-30	0.342	0.12177	0.0621	0.1001
-30	0.343	0.11709	0.0622	0.1002
-30	0.344	0.12177	0.0624	0.1003
-30	0.345	0.12312	0.0625	0.1004
-30	0.346	0.11142	0.0626	0.1005
-30	0.347	0.13311	0.0627	0.1005
-30	0.348	0.13302	0.0628	0.1006
-30	0.349	0.1233	0.0629	0.1007
-30	0.35	0.12132	0.0631	0.1008
-30	0.351	0.11646	0.0632	0.1009
-30	0.352	0.13293	0.0633	0.101
-30	0.353	0.11502	0.0634	0.101
-30	0.354	0.08694	0.0635	0.1011
-30	0.355	0.10791	0.0636	0.1012
-30	0.356	0.10953	0.0637	0.1013
-30	0.357	0.08991	0.0638	0.1014
-30	0.358	0.10026	0.0639	0.1014
-30	0.359	0.11781	0.064	0.1015
-30	0.36	0.12681	0.0641	0.1016
-30	0.361	0.12681	0.0642	0.1017
-30	0.362	0.11178	0.0642	0.1017
-30	0.363	0.12474	0.0643	0.1018
-30	0.364	0.11511	0.0644	0.1019
-30	0.365	0.10116	0.0645	0.102
-30	0.366	0.10953	0.0646	0.102
-30	0.367	0.10764	0.0647	0.1021
-30	0.368	0.11277	0.0648	0.1022
-30	0.369	0.11322	0.0648	0.1022
-30	0.37	0.09459	0.0649	0.1023
-30	0.371	0.09486	0.065	0.1024
-30	0.372	0.10548	0.0651	0.1024
-30	0.373	0.09936	0.0651	0.1025
-30	0.374	0.1062	0.0652	0.1026
-30	0.375	0.09999	0.0653	0.1026
-30	0.376	0.09252	0.0654	0.1027
-30	0.377	0.10737	0.0654	0.1028
-30	0.378	0.117	0.0655	0.1028
-30	0.379	0.11502	0.0656	0.1029
-30	0.38	0.1206	0.0656	0.103
-30	0.381	0.12087	0.0657	0.103
-30	0.382	0.11538	0.0658	0.1031
-30	0.383	0.12618	0.0658	0.1031
-30	0.384	0.12618	0.0659	0.1032
-30	0.385	0.11655	0.0659	0.1033
-30	0.386	0.12087	0.066	0.1033
-30	0.387	0.1197	0.0661	0.1034
-30	0.388	0.11133	0.0661	0.1034
-30	0.389	0.11862	0.0662	0.1035
-30	0.39	0.11421	0.0662	0.1035
-30	0.391	0.11538	0.0663	0.1036
-30	0.392	0.1251	0.0663	0.1037
-30	0.393	0.13194	0.0664	0.1037
-30	0.394	0.11367	0.0664	0.1038
-30	0.395	0.11196	0.0665	0.1038
-30	0.396	0.1233	0.0665	0.1039
-30	0.397	0.10746	0.0666	0.1039
-30	0.398	0.10782	0.0666	0.104
-30	0.399	0.09945	0.0667	0.104
0	0.4	0.12069	0.0667	0.1006
0	0.401	0.16371	0.0667	0.0973
0	0.402	0.12654	0.0666	0.0941
0	0.403	0.13626	0.0665	0.0911
0	0.404	0.12177	0.0663	0.0882
0	0.405	0.11034	0.0661	0.0854
0	0.406	0.10359	0.0659	0.0827
0	0.407	0.09	0.0656	0.0802
0	0.408	0.07569	0.0654	0.0778
0	0.409	0.08478	0.065	0.0754
0	0.41	0.0783	0.0647	0.0732
0	0.411	0.06543	0.0643	0.071
0	0.412	0.05481	0.064	0.069
0	0.413	0.06471	0.0636	0.067
0	0.414	0.0873	0.0632	0.0651
0	0.415	0.08082	0.0627	0.0633
0	0.416	0.06831	0.0623	0.0615
0	0.417	0.07272	0.0619	0.0599
0	0.418	0.05769	0.0614	0.0582
0	0.419	0.05805	0.0609	0.0567
0	0.42	0.05148	0.0605	0.0552
0	0.421	0.04401	0.06	0.0537
0	0.422	0.04851	0.0595	0.0524
0	0.423	0.03474	0.059	0.051
0	0.424	0.04923	0.0585	0.0497
0	0.425	0.03591	0.058	0.0485
0	0.426	0.04446	0.0575	0.0473
0	0.427	0.06588	0.057	0.0462
0	0.428	0.06255	0.0564	0.045
0	0.429	0.06228	0.0559	0.044
0	0.43	0.06507	0.0554	0.0429
0	0.431	0.05301	0.0549	0.0419
0	0.432	0.05301	0.0544	0.041
0	0.433	0.05058	0.0539	0.04
0	0.434	0.04743	0.0534	0.0391
0	0.435	0.04059	0.0529	0.0383
0	0.436	0.03717	0.0523	0.0374
0	0.437	0.04077	0.0518	0.0366
0	0.438	0.04698	0.0513	0.0358
0	0.439	0.05049	0.0508	0.0351
0	0.44	0.04068	0.0503	0.0343
0	0.441	0.04608	0.0498	0.0336
0	0.442	0.04401	0.0493	0.0329
0	0.443	0.05328	0.0488	0.0322
0	0.444	0.05229	0.0483	0.0316
0	0.445	0.04977	0.0478	0.031
0	0.446	0.03771	0.0474	0.0303
0	0.447	0.03456	0.0469	0.0297
0	0.448	0.04734	0.0464	0.0292
0	0.449	0.04329	0.0459	0.0286
0	0.45	0.03555	0.0455	0.0281
0	0.451	0.03771	0.045	0.0275
0	0.452	0.05301	0.0445	0.027
0	0.453	0.04698	0.0441	0.0265
0	0.454	0.04356	0.0436	0.026
0	0.455	0.04023	0.0432	0.0256
0	0.456	0.05085	0.0427	0.0251
0	0.457	0.04185	0.0423	0.0247
0	0.458	0.03852	0.0418	0.0242
0	0.459	0.03762	0.0414	0.0238
0	0.46	0.03699	0.041	0.0234
0	0.461	0.03951	0.0405	0.023
0	0.462	0.02745	0.0401	0.0226
0	0.463	0.02844	0.0397	0.0222
0	0.464	0.0288	0.0393	0.0219
0	0.465	0.03177	0.0389	0.0215
0	0.466	0.0234	0.0385	0.0211
0	0.467	0.02988	0.0381	0.0208
0	0.468	0.03285	0.0377	0.0205
0	0.469	0.03375	0.0373	0.0201
0	0.47	0.03744	0.0369	0.0198
0	0.471	0.04689	0.0365	0.0195
0	0.472	0.03267	0.0361	0.0192
0	0.473	0.03375	0.0357	0.0189
0	0.474	0.04041	0.0354	0.0186
0	0.475	0.03537	0.035	0.0183
0	0.476	0.03969	0.0346	0.0181
0	0.477	0.03528	0.0343	0.0178
0	0.478	0.0234	0.0339	0.0175
0	0.479	0.02502	0.0336	0.0173
0	0.48	0.02889	0.0332	0.017
0	0.481	0.02871	0.0329	0.0168
0	0.482	0.02898	0.0325	0.0165
0	0.483	0.03222	0.0322	0.0163
0	0.484	0.01773	0.0318	0.016
0	0.485	0.02916	0.0315	0.0158
0	0.486	0.02232	0.0312	0.0156
0	0.487	0.0315	0.0309	0.0154
0	0.488	0.02691	0.0305	0.0152
0	0.489	0.01368	0.0302	0.015
0	0.49	0.01638	0.0299	0.0148
0	0.491	0.01962	0.0296	0.0146
0	0.492	0.02916	0.0293	0.0144
0	0.493	0.03321	0.029	0.0142
0	0.494	0.02277	0.0287	0.014
0	0.495	0.01539	0.0284	0.0138
0	0.496	0.01341	0.0281	0.0136
0	0.497	0.01917	0.0278	0.0134
0	0.498	0.0162	0.0275	0.0133
0	0.499	0.00761337	0.0272	0.0131
0	0.5	0.00981	0.027	0.0129
0	0.501	0.0099	0.0267	0.0128
0	0.502	-0.0099	0.0264	0.0126
0	0.503	-0.00507636	0.0261	0.0124
0	0.504	-0.00719262	0.0259	0.0123
0	0.505	-0.00606456	0.0256	0.0121
0	0.506	-0.00376002	0.0253	0.012
0	0.507	-0.00479808	0.0251	0.0118
0	0.508	0.00410661	0.0248	0.0117
0	0.509	0.00553275	0.0246	0.0115
0	0.51	0.0050562	0.0243	0.0114
0	0.511	0.000549918	0.0241	0.0113
0	0.512	0.01008	0.0238	0.0111
0	0.513	0.01782	0.0236	0.011
0	0.514	0.02385	0.0233	0.0109
0	0.515	0.0207	0.0231	0.0107
0	0.516	0.03186	0.0229	0.0106
0	0.517	0.03186	0.0226	0.0105
0	0.518	0.027	0.0224	0.0104
0	0.519	0.03114	0.0222	0.0102
0	0.52	0.03384	0.022	0.0101
0	0.521	0.03528	0.0217	0.01
0	0.522	0.03555	0.0215	0.0099
0	0.523	0.03528	0.0213	0.0098
0	0.524	0.03681	0.0211	0.0097
0	0.525	0.01944	0.0209	0.0096
0	0.526	0.03195	0.0207	0.0095
0	0.527	0.03591	0.0205	0.0094
0	0.528	0.0333	0.0203	0.00929999
0	0.529	0.02817	0.0201	0.00920001
0	0.53	0.01467	0.0199	0.00910001
0	0.531	0.01611	0.0197	0.009
0	0.532	0.01935	0.0195	0.0089
0	0.533	0.02403	0.0193	0.0088
0	0.534	0.01116	0.0191	0.0087
0	0.535	0.018	0.0189	0.0086
0	0.536	0.01602	0.0187	0.00849999
0	0.537	0.02106	0.0185	0.00840001
0	0.538	0.00813411	0.0183	0.00830001
0	0.539	0.01089	0.0182	0.0082
0	0.54	0.01152	0.018	0.0081
0	0.541	0.00160992	0.0178	0.0081
0	0.542	0.01269	0.0176	0.008
0	0.543	0.01116	0.0175	0.0079
0	0.544	0.01836	0.0173	0.0078
0	0.545	0.02277	0.0171	0.0077
0	0.546	0.01971	0.017	0.0077
0	0.547	0.01305	0.0168	0.00759999
0	0.548	0.01728	0.0166	0.00750001
0	0.549	0.01467	0.0165	0.00740001
0	0.55	0.0189	0.0163	0.0073
0	0.551	0.0135	0.0162	0.0073
0	0.552	0.01755	0.016	0.0072
0	0.553	0.01638	0.0158	0.0071
0	0.554	0.01368	0.0157	0.0071
0	0.555	0.00936	0.0155	0.007
0	0.556	0.01314	0.0154	0.0069
0	0.557	0.01755	0.0152	0.0069
0	0.558	0.01575	0.0151	0.0068
0	0.559	0.01224	0.015	0.00669999
0	0.56	0.01584	0.0148	0.00669999
0	0.561	0.01575	0.0147	0.00660001
0	0.562	0.01629	0.0145	0.00650001
0	0.563	0.01809	0.0144	0.00650001
0	0.564	0.02043	0.0143	0.0064
0	0.565	0.01359	0.0141	0.0064
0	0.566	0.02637	0.014	0.0063
0	0.567	0.036	0.0139	0.0062
0	0.568	0.02727	0.0137	0.0062
0	0.569	0.02412	0.0136	0.0061
0	0.57	0.02223	0.0135	0.0061
0	0.571	0.02376	0.0133	0.006
0	0.572	0.02556	0.0132	0.006
0	0.573	0.02034	0.0131	0.0059
0	0.574	0.01467	0.013	0.0059
0	0.575	-0.000865179	0.0128	0.00579999
0	0.576	-0.00141543	0.0127	0.00579999
0	0.577	0.01188	0.0126	0.00570001
0	0.578	0.01134	0.0125	0.00570001
0	0.579	-0.00154881	0.0124	0.00560001
0	0.58	-0.000464886	0.0123	0.00560001
0	0.581	0.00258516	0.0121	0.0055
0	0.582	0.01521	0.012	0.0055
0	0.583	0.00691974	0.0119	0.0054
0	0.584	0.01953	0.0118	0.0054
0	0.585	0.0261	0.0117	0.0053
0	0.586	0.03825	0.0116	0.0053
0	0.587	0.04176	0.0115	0.0052
0	0.588	0.04572	0.0114	0.0052
0	0.589	0.04149	0.0113	0.0052
0	0.59	0.02232	0.0112	0.0051
0	0.591	0.01935	0.0111	0.0051
0	0.592	0.02196	0.011	0.005
0	0.593	0.02853	0.0109	0.005
0	0.594	0.02736	0.0108	0.00489999
0	0.595	0.0189	0.0107	0.00489999
0	0.596	0.02664	0.0106	0.00489999
0	0.597	0.02682	0.0105	0.00480001
0	0.598	0.00916729	0.0104	0.00480001
