# Supplementary material for: Mechanosensitive pore opening of a prokaryotic voltage-gated sodium channel
Source: eLife. 2023 Mar 13;12:e79271. doi: 10.7554/eLife.79271 (PMC10038658; doi:10.7554/eLife.79271)
Supplement: Figure 5—source data 1. [file elife-79271-fig5-data1.xlsx]

## Sheet: Figure 5D
Open probability																	Fitted curves
	T220A background					D93A					I228G							T220A background		D93A		I228G
Voltage (mV)	n (cells)	0 mmHg	SEM	-10 mmHg	SEM	n (cells)	0 mmHg	SEM	-10 mmHg	SEM	n (cells)	0 mmHg	SEM	-10 mmHg	SEM		Voltage (mV)	0 mmHg	-10 mmHg	0 mmHg	-10 mmHg	0 mmHg	-10 mmHg
-100	11	0.0234477	0.0130153	0.0275718	0.0144687	8	0.0788241	0.0220786	0.10928	0.062297	12	0.0213959	0.00862312	0.0192848	0.00814505		-100	0.00134736	0.00175735	0.0791216	0.0849366	0.0241216	0.0244444
-80	12	0.0191505	0.00546638	0.0241937	0.00894454	7	0.134698	0.023029	0.237205	0.0477861	12	0.0284567	0.0198455	0.0317397	0.0194212		-99.6875	0.00137303	0.00181593	0.0791369	0.0853372	0.024122	0.0244448
-60	7	0.175919	0.0437777	0.271475	0.0689354	8	0.471466	0.0819992	0.553955	0.0796562	10	0.100215	0.0331877	0.113878	0.0358861		-99.375	0.0014005	0.00187874	0.079154	0.0857664	0.0241224	0.0244454
-40	11	0.353481	0.0713903	0.443402	0.0701032	8	0.657168	0.0513338	0.664709	0.0449791	11	0.379008	0.0622068	0.39114	0.0661614		-99.0625	0.00142988	0.00194607	0.0791733	0.0862259	0.024123	0.0244459
-20	11	0.524859	0.0669106	0.550533	0.0701917	8	0.638105	0.0111201	0.610814	0.0151077	10	0.53657	0.0691791	0.524439	0.0668669		-98.75	0.00146131	0.0020182	0.0791948	0.0867174	0.0241235	0.0244466
																	-98.4375	0.0014949	0.00209546	0.0792188	0.0872428	0.0241241	0.0244473
																	-98.125	0.0015308	0.00217816	0.0792458	0.0878038	0.0241248	0.024448
																	-97.8125	0.00156916	0.00226665	0.0792758	0.0884023	0.0241256	0.0244489
																	-97.5	0.00161013	0.00236129	0.0793094	0.0890403	0.0241264	0.0244498
																	-97.1875	0.00165387	0.00246247	0.0793468	0.0897199	0.0241273	0.0244509
																	-96.875	0.00170055	0.00257058	0.0793886	0.090443	0.0241283	0.024452
																	-96.5625	0.00175036	0.00268605	0.0794351	0.0912117	0.0241294	0.0244533
																	-96.25	0.00180349	0.00280932	0.0794868	0.0920282	0.0241306	0.0244547
																	-95.9375	0.00186013	0.00294086	0.0795444	0.0928947	0.024132	0.0244562
																	-95.625	0.0019205	0.00308114	0.0796083	0.0938133	0.0241334	0.0244579
																	-95.3125	0.00198481	0.00323068	0.0796793	0.0947863	0.0241351	0.0244598
																	-95	0.00205331	0.00339001	0.0797581	0.0958159	0.0241368	0.0244619
																	-94.6875	0.00212624	0.00355969	0.0798454	0.0969045	0.0241388	0.0244641
																	-94.375	0.00220386	0.00374029	0.0799421	0.0980543	0.0241409	0.0244666
																	-94.0625	0.00228642	0.00393242	0.0800491	0.0992675	0.0241433	0.0244694
																	-93.75	0.00237423	0.00413671	0.0801674	0.100547	0.0241459	0.0244724
																	-93.4375	0.00246756	0.00435382	0.080298	0.101894	0.0241487	0.0244758
																	-93.125	0.00256674	0.00458442	0.0804421	0.103311	0.0241519	0.0244795
																	-92.8125	0.00267208	0.00482923	0.0806009	0.104801	0.0241553	0.0244835
																	-92.5	0.00278393	0.00508898	0.0807758	0.106365	0.024159	0.024488
																	-92.1875	0.00290263	0.00536442	0.0809682	0.108007	0.0241632	0.0244928
																	-91.875	0.00302855	0.00565636	0.0811796	0.109727	0.0241677	0.0244982
																	-91.5625	0.00316209	0.00596559	0.0814117	0.111528	0.0241726	0.0245041
																	-91.25	0.00330363	0.00629297	0.0816661	0.113413	0.024178	0.0245106
																	-90.9375	0.00345359	0.00663936	0.0819449	0.115382	0.024184	0.0245177
																	-90.625	0.00361242	0.00700566	0.0822498	0.117437	0.0241905	0.0245255
																	-90.3125	0.00378055	0.00739278	0.0825831	0.119581	0.0241976	0.0245341
																	-90	0.00395845	0.00780167	0.082947	0.121815	0.0242054	0.0245435
																	-89.6875	0.00414662	0.0082333	0.0833437	0.124141	0.0242139	0.0245538
																	-89.375	0.00434554	0.00868867	0.0837758	0.126559	0.0242233	0.0245651
																	-89.0625	0.00455575	0.00916879	0.0842458	0.129071	0.0242335	0.0245775
																	-88.75	0.00477778	0.00967472	0.0847565	0.131678	0.0242446	0.024591
																	-88.4375	0.00501218	0.0102075	0.0853107	0.134382	0.0242568	0.0246058
																	-88.125	0.00525954	0.0107682	0.0859114	0.137182	0.0242701	0.024622
																	-87.8125	0.00552044	0.011358	0.0865616	0.14008	0.0242846	0.0246398
																	-87.5	0.00579549	0.011978	0.0872645	0.143076	0.0243004	0.0246592
																	-87.1875	0.00608533	0.0126292	0.0880234	0.14617	0.0243177	0.0246803
																	-86.875	0.00639061	0.013313	0.0888418	0.149363	0.0243366	0.0247035
																	-86.5625	0.00671198	0.0140304	0.0897231	0.152655	0.0243571	0.0247287
																	-86.25	0.00705014	0.0147826	0.090671	0.156045	0.0243795	0.0247563
																	-85.9375	0.00740578	0.0155707	0.091689	0.159533	0.0244038	0.0247863
																	-85.625	0.00777962	0.0163961	0.0927809	0.163118	0.0244303	0.0248191
																	-85.3125	0.0081724	0.0172599	0.0939506	0.1668	0.0244592	0.0248548
																	-85	0.00858487	0.0181634	0.0952018	0.170578	0.0244906	0.0248937
																	-84.6875	0.00901779	0.0191076	0.0965383	0.17445	0.0245247	0.024936
																	-84.375	0.00947195	0.0200938	0.0979641	0.178416	0.0245617	0.0249821
																	-84.0625	0.00994815	0.0211233	0.0994829	0.182474	0.024602	0.0250321
																	-83.75	0.0104472	0.0221972	0.101099	0.186622	0.0246457	0.0250865
																	-83.4375	0.0109699	0.0233167	0.102815	0.190859	0.0246931	0.0251456
																	-83.125	0.0115171	0.0244829	0.104636	0.195183	0.0247445	0.0252098
																	-82.8125	0.0120897	0.0256971	0.106564	0.199591	0.0248002	0.0252794
																	-82.5	0.0126885	0.0269603	0.108605	0.204081	0.0248606	0.0253549
																	-82.1875	0.0133144	0.0282737	0.11076	0.208651	0.024926	0.0254367
																	-81.875	0.0139682	0.0296384	0.113033	0.213298	0.0249967	0.0255253
																	-81.5625	0.0146509	0.0310554	0.115427	0.218019	0.0250733	0.0256212
																	-81.25	0.0153633	0.0325257	0.117946	0.222813	0.025156	0.025725
																	-80.9375	0.0161063	0.0340503	0.120591	0.227674	0.0252454	0.0258371
																	-80.625	0.0168808	0.0356303	0.123365	0.232602	0.0253419	0.0259583
																	-80.3125	0.0176877	0.0372665	0.12627	0.237592	0.0254461	0.0260892
																	-80	0.018528	0.0389598	0.129309	0.242641	0.0255585	0.0262304
																	-79.6875	0.0194024	0.040711	0.132482	0.247746	0.0256796	0.0263826
																	-79.375	0.0203119	0.0425208	0.135791	0.252904	0.0258101	0.0265467
																	-79.0625	0.0212574	0.0443901	0.139238	0.25811	0.0259506	0.0267234
																	-78.75	0.0222398	0.0463195	0.142822	0.263361	0.0261018	0.0269135
																	-78.4375	0.0232598	0.0483096	0.146544	0.268655	0.0262644	0.027118
																	-78.125	0.0243185	0.050361	0.150404	0.273986	0.0264391	0.0273378
																	-77.8125	0.0254165	0.052474	0.154402	0.279352	0.0266267	0.0275738
																	-77.5	0.0265549	0.0546493	0.158536	0.284749	0.0268281	0.027827
																	-77.1875	0.0277343	0.056887	0.162806	0.290173	0.0270441	0.0280986
																	-76.875	0.0289555	0.0591876	0.167211	0.29562	0.0272756	0.0283895
																	-76.5625	0.0302194	0.0615511	0.171747	0.301087	0.0275236	0.0287011
																	-76.25	0.0315267	0.0639778	0.176414	0.30657	0.027789	0.0290345
																	-75.9375	0.0328781	0.0664678	0.181207	0.312065	0.028073	0.0293908
																	-75.625	0.0342743	0.0690209	0.186126	0.317569	0.0283765	0.0297716
																	-75.3125	0.035716	0.0716372	0.191165	0.323078	0.0287007	0.030178
																	-75	0.0372039	0.0743164	0.196322	0.328589	0.0290468	0.0306115
																	-74.6875	0.0387385	0.0770584	0.201593	0.334099	0.0294159	0.0310735
																	-74.375	0.0403204	0.0798627	0.206973	0.339603	0.0298093	0.0315654
																	-74.0625	0.0419502	0.0827291	0.212458	0.345098	0.0302283	0.0320889
																	-73.75	0.0436284	0.085657	0.218043	0.350582	0.0306743	0.0326455
																	-73.4375	0.0453554	0.0886458	0.223723	0.356051	0.0311486	0.0332367
																	-73.125	0.0471317	0.091695	0.229493	0.361502	0.0316526	0.0338643
																	-72.8125	0.0489576	0.0948038	0.235347	0.366931	0.0321878	0.0345298
																	-72.5	0.0508335	0.0979715	0.24128	0.372337	0.0327557	0.0352351
																	-72.1875	0.0527597	0.101197	0.247286	0.377716	0.0333578	0.0359817
																	-71.875	0.0547364	0.10448	0.253359	0.383066	0.0339957	0.0367716
																	-71.5625	0.0567639	0.107818	0.259493	0.388383	0.034671	0.0376064
																	-71.25	0.0588422	0.111212	0.265682	0.393666	0.0353852	0.0384879
																	-70.9375	0.0609714	0.114659	0.271919	0.398911	0.0361401	0.0394181
																	-70.625	0.0631517	0.118159	0.2782	0.404117	0.0369373	0.0403986
																	-70.3125	0.065383	0.12171	0.284516	0.409282	0.0377785	0.0414313
																	-70	0.0676653	0.125311	0.290863	0.414402	0.0386654	0.042518
																	-69.6875	0.0699984	0.128961	0.297233	0.419477	0.0395997	0.0436606
																	-69.375	0.0723821	0.132658	0.303622	0.424504	0.0405832	0.0448608
																	-69.0625	0.0748164	0.1364	0.310022	0.429482	0.0416176	0.0461204
																	-68.75	0.0773008	0.140186	0.316427	0.434409	0.0427046	0.0474412
																	-68.4375	0.0798351	0.144015	0.322833	0.439283	0.0438459	0.0488249
																	-68.125	0.0824189	0.147884	0.329232	0.444103	0.0450433	0.0502732
																	-67.8125	0.0850518	0.151792	0.33562	0.448868	0.0462985	0.0517877
																	-67.5	0.0877333	0.155737	0.34199	0.453576	0.0476131	0.05337
																	-67.1875	0.0904627	0.159718	0.348338	0.458226	0.0489888	0.0550217
																	-66.875	0.0932397	0.163733	0.354659	0.462817	0.0504272	0.0567443
																	-66.5625	0.0960634	0.167779	0.360947	0.467348	0.0519299	0.0585391
																	-66.25	0.0989333	0.171855	0.367197	0.471818	0.0534985	0.0604074
																	-65.9375	0.101849	0.17596	0.373405	0.476227	0.0551344	0.0623506
																	-65.625	0.104808	0.18009	0.379567	0.480573	0.056839	0.0643698
																	-65.3125	0.107812	0.184245	0.385679	0.484857	0.0586138	0.0664661
																	-65	0.110858	0.188421	0.391736	0.489077	0.0604601	0.0686404
																	-64.6875	0.113947	0.192619	0.397735	0.493234	0.062379	0.0708936
																	-64.375	0.117076	0.196834	0.403671	0.497326	0.0643718	0.0732265
																	-64.0625	0.120245	0.201066	0.409543	0.501354	0.0664396	0.0756397
																	-63.75	0.123453	0.205313	0.415347	0.505317	0.0685833	0.0781337
																	-63.4375	0.126699	0.209572	0.421079	0.509216	0.0708037	0.0807089
																	-63.125	0.129981	0.213841	0.426738	0.513049	0.0731018	0.0833656
																	-62.8125	0.133299	0.21812	0.43232	0.516818	0.0754783	0.0861039
																	-62.5	0.136652	0.222405	0.437824	0.520522	0.0779336	0.0889239
																	-62.1875	0.140037	0.226695	0.443248	0.524161	0.0804683	0.0918254
																	-61.875	0.143454	0.230988	0.448589	0.527736	0.0830828	0.0948082
																	-61.5625	0.146902	0.235282	0.453846	0.531247	0.0857773	0.0978718
																	-61.25	0.150378	0.239575	0.459018	0.534694	0.0885519	0.101016
																	-60.9375	0.153883	0.243866	0.464103	0.538076	0.0914067	0.104239
																	-60.625	0.157414	0.248153	0.469101	0.541396	0.0943414	0.107542
																	-60.3125	0.16097	0.252433	0.474009	0.544653	0.097356	0.110922
																	-60	0.16455	0.256706	0.478829	0.547847	0.10045	0.114379
																	-59.6875	0.168152	0.26097	0.483558	0.55098	0.103623	0.117911
																	-59.375	0.171775	0.265222	0.488198	0.554051	0.106874	0.121518
																	-59.0625	0.175418	0.269462	0.492746	0.557061	0.110202	0.125197
																	-58.75	0.179078	0.273687	0.497204	0.560011	0.113608	0.128948
																	-58.4375	0.182755	0.277897	0.501571	0.562901	0.117089	0.132767
																	-58.125	0.186448	0.282089	0.505847	0.565733	0.120644	0.136655
																	-57.8125	0.190154	0.286263	0.510033	0.568505	0.124272	0.140607
																	-57.5	0.193872	0.290417	0.514129	0.571221	0.127973	0.144623
																	-57.1875	0.197601	0.294549	0.518135	0.573879	0.131744	0.148701
																	-56.875	0.201339	0.298659	0.522052	0.576481	0.135583	0.152837
																	-56.5625	0.205085	0.302744	0.525881	0.579028	0.139489	0.15703
																	-56.25	0.208838	0.306804	0.529622	0.58152	0.143461	0.161276
																	-55.9375	0.212596	0.310838	0.533276	0.583958	0.147496	0.165575
																	-55.625	0.216357	0.314844	0.536843	0.586343	0.151592	0.169922
																	-55.3125	0.220121	0.318822	0.540326	0.588675	0.155747	0.174316
																	-55	0.223886	0.32277	0.543725	0.590956	0.159959	0.178753
																	-54.6875	0.22765	0.326687	0.547041	0.593186	0.164226	0.183231
																	-54.375	0.231412	0.330573	0.550274	0.595366	0.168544	0.187747
																	-54.0625	0.235172	0.334426	0.553427	0.597497	0.172913	0.192298
																	-53.75	0.238927	0.338246	0.556501	0.59958	0.177329	0.196881
																	-53.4375	0.242676	0.342032	0.559496	0.601615	0.18179	0.201494
																	-53.125	0.246418	0.345783	0.562414	0.603603	0.186292	0.206133
																	-52.8125	0.250152	0.349498	0.565256	0.605546	0.190834	0.210795
																	-52.5	0.253876	0.353177	0.568024	0.607443	0.195413	0.215478
																	-52.1875	0.25759	0.356819	0.570718	0.609297	0.200026	0.220178
																	-51.875	0.261292	0.360424	0.573341	0.611106	0.20467	0.224892
																	-51.5625	0.264982	0.363991	0.575893	0.612874	0.209343	0.229619
																	-51.25	0.268657	0.367519	0.578376	0.614599	0.214041	0.234354
																	-50.9375	0.272317	0.371008	0.580792	0.616284	0.218762	0.239095
																	-50.625	0.275961	0.374458	0.583141	0.617928	0.223504	0.243839
																	-50.3125	0.279588	0.377868	0.585425	0.619533	0.228262	0.248584
																	-50	0.283197	0.381238	0.587646	0.621099	0.233035	0.253326
																	-49.6875	0.286787	0.384568	0.589805	0.622627	0.23782	0.258063
																	-49.375	0.290357	0.387856	0.591903	0.624119	0.242614	0.262792
																	-49.0625	0.293906	0.391105	0.593941	0.625574	0.247414	0.26751
																	-48.75	0.297433	0.394311	0.595921	0.626993	0.252218	0.272216
																	-48.4375	0.300938	0.397477	0.597845	0.628378	0.257022	0.276907
																	-48.125	0.30442	0.400601	0.599713	0.629728	0.261825	0.281579
																	-47.8125	0.307877	0.403684	0.601528	0.631046	0.266624	0.286232
																	-47.5	0.31131	0.406726	0.603289	0.63233	0.271415	0.290862
																	-47.1875	0.314717	0.409725	0.604999	0.633583	0.276198	0.295468
																	-46.875	0.318097	0.412684	0.606659	0.634805	0.280968	0.300047
																	-46.5625	0.321452	0.4156	0.608271	0.635995	0.285725	0.304598
																	-46.25	0.324778	0.418475	0.609834	0.637157	0.290465	0.309118
																	-45.9375	0.328077	0.421309	0.611351	0.638288	0.295186	0.313606
																	-45.625	0.331347	0.424101	0.612823	0.639392	0.299887	0.318059
																	-45.3125	0.334588	0.426852	0.614251	0.640467	0.304565	0.322477
																	-45	0.3378	0.429562	0.615636	0.641516	0.309217	0.326857
																	-44.6875	0.340981	0.432231	0.616979	0.642537	0.313843	0.331198
																	-44.375	0.344133	0.434859	0.618281	0.643533	0.31844	0.335499
																	-44.0625	0.347253	0.437447	0.619545	0.644503	0.323007	0.339758
																	-43.75	0.350343	0.439994	0.620769	0.645448	0.327541	0.343973
																	-43.4375	0.353401	0.442501	0.621957	0.64637	0.332041	0.348144
																	-43.125	0.356427	0.444968	0.623108	0.647267	0.336505	0.35227
																	-42.8125	0.359421	0.447396	0.624223	0.648141	0.340932	0.35635
																	-42.5	0.362383	0.449784	0.625305	0.648993	0.345321	0.360382
																	-42.1875	0.365312	0.452133	0.626353	0.649823	0.34967	0.364365
																	-41.875	0.368208	0.454444	0.627368	0.650631	0.353977	0.3683
																	-41.5625	0.371072	0.456716	0.628352	0.651419	0.358242	0.372184
																	-41.25	0.373902	0.45895	0.629306	0.652186	0.362463	0.376018
																	-40.9375	0.3767	0.461147	0.63023	0.652933	0.36664	0.379801
																	-40.625	0.379464	0.463306	0.631125	0.65366	0.370771	0.383532
																	-40.3125	0.382194	0.465428	0.631992	0.654368	0.374856	0.387211
																	-40	0.384891	0.467513	0.632831	0.655058	0.378893	0.390837
																	-39.6875	0.387555	0.469563	0.633645	0.65573	0.382882	0.394411
																	-39.375	0.390185	0.471576	0.634433	0.656384	0.386822	0.397931
																	-39.0625	0.392781	0.473554	0.635196	0.657021	0.390712	0.401398
																	-38.75	0.395344	0.475497	0.635935	0.657642	0.394553	0.404811
																	-38.4375	0.397873	0.477405	0.63665	0.658246	0.398342	0.408171
																	-38.125	0.400369	0.479279	0.637343	0.658834	0.402081	0.411477
																	-37.8125	0.402832	0.481119	0.638014	0.659406	0.405768	0.414729
																	-37.5	0.405261	0.482925	0.638664	0.659963	0.409403	0.417927
																	-37.1875	0.407657	0.484699	0.639293	0.660506	0.412986	0.421072
																	-36.875	0.410019	0.48644	0.639902	0.661034	0.416517	0.424164
																	-36.5625	0.412349	0.488149	0.640491	0.661548	0.419995	0.427202
																	-36.25	0.414646	0.489827	0.641062	0.662048	0.423421	0.430187
																	-35.9375	0.41691	0.491473	0.641614	0.662536	0.426794	0.433119
																	-35.625	0.419142	0.493088	0.642149	0.66301	0.430114	0.435998
																	-35.3125	0.421341	0.494673	0.642667	0.663471	0.433381	0.438826
																	-35	0.423508	0.496227	0.643168	0.66392	0.436596	0.441601
																	-34.6875	0.425643	0.497753	0.643652	0.664358	0.439758	0.444325
																	-34.375	0.427746	0.499249	0.644122	0.664783	0.442868	0.446998
																	-34.0625	0.429818	0.500716	0.644576	0.665197	0.445926	0.44962
																	-33.75	0.431858	0.502155	0.645015	0.6656	0.448931	0.452192
																	-33.4375	0.433868	0.503567	0.64544	0.665992	0.451885	0.454714
																	-33.125	0.435846	0.504951	0.645852	0.666374	0.454787	0.457186
																	-32.8125	0.437794	0.506308	0.64625	0.666746	0.457638	0.459611
																	-32.5	0.439711	0.507638	0.646635	0.667107	0.460438	0.461986
																	-32.1875	0.441599	0.508943	0.647008	0.667459	0.463188	0.464315
																	-31.875	0.443456	0.510222	0.647369	0.667801	0.465887	0.466596
																	-31.5625	0.445284	0.511475	0.647718	0.668134	0.468537	0.46883
																	-31.25	0.447083	0.512704	0.648056	0.668458	0.471137	0.471019
																	-30.9375	0.448853	0.513908	0.648383	0.668773	0.473689	0.473162
																	-30.625	0.450594	0.515088	0.648699	0.66908	0.476192	0.475261
																	-30.3125	0.452307	0.516244	0.649004	0.669379	0.478648	0.477316
																	-30	0.453991	0.517377	0.6493	0.669669	0.481056	0.479327
																	-29.6875	0.455648	0.518488	0.649587	0.669952	0.483417	0.481295
																	-29.375	0.457277	0.519576	0.649863	0.670227	0.485732	0.483221
																	-29.0625	0.45888	0.520642	0.650131	0.670494	0.488002	0.485106
																	-28.75	0.460455	0.521686	0.65039	0.670754	0.490226	0.48695
																	-28.4375	0.462004	0.522709	0.650641	0.671007	0.492405	0.488753
																	-28.125	0.463526	0.523711	0.650884	0.671254	0.494541	0.490517
																	-27.8125	0.465023	0.524692	0.651118	0.671493	0.496633	0.492243
																	-27.5	0.466494	0.525654	0.651345	0.671726	0.498682	0.493929
																	-27.1875	0.46794	0.526595	0.651564	0.671953	0.50069	0.495579
																	-26.875	0.469361	0.527518	0.651777	0.672174	0.502655	0.497191
																	-26.5625	0.470757	0.528421	0.651982	0.672388	0.50458	0.498767
																	-26.25	0.472129	0.529305	0.65218	0.672597	0.506464	0.500308
																	-25.9375	0.473477	0.530171	0.652373	0.6728	0.508308	0.501813
																	-25.625	0.474802	0.531019	0.652558	0.672998	0.510114	0.503284
																	-25.3125	0.476103	0.531849	0.652738	0.67319	0.511881	0.504721
																	-25	0.477381	0.532662	0.652912	0.673377	0.51361	0.506126
																	-24.6875	0.478636	0.533458	0.65308	0.673559	0.515301	0.507497
																	-24.375	0.479869	0.534237	0.653242	0.673736	0.516956	0.508837
																	-24.0625	0.48108	0.535	0.653399	0.673908	0.518575	0.510146
																	-23.75	0.482269	0.535746	0.653551	0.674075	0.520159	0.511424
																	-23.4375	0.483437	0.536477	0.653698	0.674238	0.521708	0.512672
																	-23.125	0.484584	0.537193	0.653841	0.674396	0.523222	0.513891
																	-22.8125	0.48571	0.537893	0.653978	0.67455	0.524704	0.515081
																	-22.5	0.486815	0.538578	0.654111	0.6747	0.526152	0.516243
																	-22.1875	0.4879	0.539249	0.65424	0.674846	0.527568	0.517377
																	-21.875	0.488966	0.539905	0.654364	0.674988	0.528952	0.518484
																	-21.5625	0.490012	0.540548	0.654484	0.675125	0.530305	0.519565
																	-21.25	0.491038	0.541177	0.654601	0.67526	0.531627	0.52062
																	-20.9375	0.492046	0.541792	0.654713	0.67539	0.532919	0.521649
																	-20.625	0.493035	0.542394	0.654822	0.675517	0.534182	0.522653
																	-20.3125	0.494005	0.542983	0.654927	0.67564	0.535416	0.523634
																	-20	0.494958	0.54356	0.655029	0.67576	0.536622	0.52459

## Sheet: Figure 5E
Change (difference) in open probability from pre-control
	T220A background			D93A			I228G
Voltage (mV)	n (cells)	∆Po	SEM	n (cells)	∆Po	SEM	n (cells)	∆Po	SEM
-100	11	0.00412418	0.00234599	8	0.030456	0.0431997	12	-0.00211111	0.00123269
-80	12	0.0050432	0.00453132	7	0.102507	0.0370651	12	0.00328303	0.00213214
-60	7	0.0955562	0.0434654	8	0.0824899	0.0135911	10	0.0136627	0.0106287
-40	11	0.0899219	0.0247307	8	0.00754161	0.0227204	11	0.0121319	0.0105445
-20	11	0.0256749	0.0102727	8	-0.0272908	0.0162954	10	-0.0121307	0.0104575
