# Supplementary material for: Mechanosensitive pore opening of a prokaryotic voltage-gated sodium channel
Source: eLife. 2023 Mar 13;12:e79271. doi: 10.7554/eLife.79271 (PMC10038658; doi:10.7554/eLife.79271)
Supplement: Figure 5—source data 2. [file elife-79271-fig5-data2.xlsx]

## Sheet: Supplement 5C
Normalized current								Fitted curves
	T220A background		D93A		I228G			T220A background		D93A		I228G
Voltage (mV)	Mean	SEM	Mean	SEM	Mean	SEM		Voltage (mV)	Current	Voltage (mV)	Current	Voltage (mV)	Current
-120	0.00588022	0.00327452	0	0	0	0		-120	0.00013323	-120	0.0157517	-120	7.30669e-06
-110	0.0166919	0.0115819	0.071125	0.0257759	4.43669e-05	4.43669e-05		-119.531	0.000145825	-119.727	0.0164946	-119.531	8.04227e-06
-100	0.0120565	0.0049424	0.341195	0.0987031	0.000964896	0.000833636		-119.062	0.00015961	-119.453	0.0172719	-119.062	8.8519e-06
-90	0.0467307	0.0151786	0.726188	0.132041	0.0143736	0.0080308		-118.594	0.000174698	-119.18	0.0180852	-118.594	9.74303e-06
-80	0.189045	0.0493432	0.940783	0.0278369	0.0267524	0.0113218		-118.125	0.000191212	-118.906	0.018936	-118.125	1.07239e-05
-70	0.613388	0.106057	1	0	0.178875	0.0317265		-117.656	0.000209286	-118.633	0.0198261	-117.656	1.18035e-05
-60	0.899277	0.0521666	1	0	0.596632	0.0577696		-117.188	0.000229069	-118.359	0.0207571	-117.188	1.29917e-05
-50	1	0	1	0	0.946211	0.0199506		-116.719	0.000250721	-118.086	0.0217308	-116.719	1.42996e-05
-40	1	0			1	0		-116.25	0.00027442	-117.812	0.0227492	-116.25	1.57392e-05
-30	1	0			1	0		-115.781	0.000300358	-117.539	0.0238142	-115.781	1.73236e-05
								-115.312	0.000328746	-117.266	0.0249277	-115.312	1.90676e-05
								-114.844	0.000359817	-116.992	0.026092	-114.844	2.09872e-05
								-114.375	0.000393823	-116.719	0.027309	-114.375	2.30999e-05
								-113.906	0.000431042	-116.445	0.0285812	-113.906	2.54254e-05
								-113.438	0.000471776	-116.172	0.0299109	-113.438	2.7985e-05
								-112.969	0.000516358	-115.898	0.0313004	-112.969	3.08022e-05
								-112.5	0.00056515	-115.625	0.0327523	-112.5	3.3903e-05
								-112.031	0.00061855	-115.352	0.0342692	-112.031	3.7316e-05
								-111.562	0.000676993	-115.078	0.0358537	-111.562	4.10725e-05
								-111.094	0.000740953	-114.805	0.0375087	-111.094	4.52072e-05
								-110.625	0.000810951	-114.531	0.0392369	-110.625	4.97581e-05
								-110.156	0.000887555	-114.258	0.0410414	-110.156	5.47671e-05
								-109.688	0.000971389	-113.984	0.0429252	-109.688	6.02803e-05
								-109.219	0.00106313	-113.711	0.0448914	-109.219	6.63484e-05
								-108.75	0.00116353	-113.438	0.0469433	-108.75	7.30274e-05
								-108.281	0.0012734	-113.164	0.0490842	-108.281	8.03786e-05
								-107.812	0.00139363	-112.891	0.0513175	-107.812	8.84698e-05
								-107.344	0.00152519	-112.617	0.0536467	-107.344	9.73754e-05
								-106.875	0.00166915	-112.344	0.0560754	-106.875	0.000107177
								-106.406	0.00182668	-112.07	0.0586072	-106.406	0.000117966
								-105.938	0.00199904	-111.797	0.061246	-105.938	0.00012984
								-105.469	0.00218763	-111.523	0.0639955	-105.469	0.00014291
								-105	0.00239397	-111.25	0.0668597	-105	0.000157295
								-104.531	0.00261971	-110.977	0.0698426	-104.531	0.000173127
								-104.062	0.00286669	-110.703	0.0729481	-104.062	0.000190553
								-103.594	0.00313688	-110.43	0.0761806	-103.594	0.000209732
								-103.125	0.00343244	-110.156	0.079544	-103.125	0.000230841
								-102.656	0.00375575	-109.883	0.0830426	-102.656	0.000254075
								-102.188	0.00410938	-109.609	0.0866806	-102.188	0.000279646
								-101.719	0.00449616	-109.336	0.0904624	-101.719	0.00030779
								-101.25	0.00491917	-109.062	0.0943921	-101.25	0.000338766
								-100.781	0.00538176	-108.789	0.0984742	-100.781	0.000372857
								-100.312	0.00588759	-108.516	0.102713	-100.312	0.000410378
								-99.8438	0.00644066	-108.242	0.107112	-99.8438	0.000451673
								-99.375	0.00704531	-107.969	0.111677	-99.375	0.000497122
								-98.9062	0.00770629	-107.695	0.116411	-98.9062	0.000547141
								-98.4375	0.00842875	-107.422	0.121318	-98.4375	0.000602189
								-97.9688	0.00921832	-107.148	0.126403	-97.9688	0.000662773
								-97.5	0.0100811	-106.875	0.131669	-97.5	0.000729447
								-97.0312	0.0110237	-106.602	0.13712	-97.0312	0.000802823
								-96.5625	0.0120534	-106.328	0.14276	-96.5625	0.000883574
								-96.0938	0.013178	-106.055	0.148591	-96.0938	0.000972439
								-95.625	0.014406	-105.781	0.154619	-95.625	0.00107023
								-95.1562	0.0157466	-105.508	0.160845	-95.1562	0.00117785
								-94.6875	0.0172098	-105.234	0.167272	-94.6875	0.00129627
								-94.2188	0.0188063	-104.961	0.173903	-94.2188	0.00142658
								-93.75	0.0205478	-104.688	0.18074	-93.75	0.00156998
								-93.2812	0.022447	-104.414	0.187785	-93.2812	0.00172776
								-92.8125	0.0245172	-104.141	0.19504	-92.8125	0.00190136
								-92.3438	0.0267732	-103.867	0.202505	-92.3438	0.00209238
								-91.875	0.0292305	-103.594	0.210182	-91.875	0.00230254
								-91.4062	0.031906	-103.32	0.21807	-91.4062	0.00253375
								-90.9375	0.0348176	-103.047	0.226171	-90.9375	0.00278812
								-90.4688	0.0379844	-102.773	0.234482	-90.4688	0.00306794
								-90	0.0414269	-102.5	0.243003	-90	0.00337576
								-89.5312	0.0451668	-102.227	0.251733	-89.5312	0.00371434
								-89.0625	0.049227	-101.953	0.260669	-89.0625	0.00408674
								-88.5938	0.0536316	-101.68	0.269808	-88.5938	0.00449632
								-88.125	0.0584061	-101.406	0.279147	-88.125	0.00494673
								-87.6562	0.0635772	-101.133	0.288682	-87.6562	0.00544202
								-87.1875	0.0691724	-100.859	0.298409	-87.1875	0.0059866
								-86.7188	0.0752205	-100.586	0.308322	-86.7188	0.00658532
								-86.25	0.0817509	-100.312	0.318416	-86.25	0.00724347
								-85.7812	0.0887939	-100.039	0.328684	-85.7812	0.00796688
								-85.3125	0.09638	-99.7656	0.339119	-85.3125	0.0087619
								-84.8438	0.10454	-99.4922	0.349714	-84.8438	0.00963548
								-84.375	0.113304	-99.2188	0.360461	-84.375	0.0105952
								-83.9062	0.122702	-98.9453	0.37135	-83.9062	0.0116495
								-83.4375	0.132763	-98.6719	0.382373	-83.4375	0.0128072
								-82.9688	0.143514	-98.3984	0.393519	-82.9688	0.0140784
								-82.5	0.154979	-98.125	0.404778	-82.5	0.0154738
								-82.0312	0.167183	-97.8516	0.41614	-82.0312	0.0170051
								-81.5625	0.180142	-97.5781	0.427593	-81.5625	0.018685
								-81.0938	0.193872	-97.3047	0.439125	-81.0938	0.0205275
								-80.625	0.208382	-97.0312	0.450725	-80.625	0.0225474
								-80.1562	0.223677	-96.7578	0.462381	-80.1562	0.0247611
								-79.6875	0.239755	-96.4844	0.47408	-79.6875	0.0271861
								-79.2188	0.256606	-96.2109	0.485809	-79.2188	0.0298413
								-78.75	0.274214	-95.9375	0.497555	-78.75	0.0327471
								-78.2812	0.292556	-95.6641	0.509307	-78.2812	0.0359254
								-77.8125	0.311597	-95.3906	0.52105	-77.8125	0.0393996
								-77.3438	0.331297	-95.1172	0.532772	-77.3438	0.0431947
								-76.875	0.351607	-94.8438	0.54446	-76.875	0.0473374
								-76.4062	0.372468	-94.5703	0.556102	-76.4062	0.0518558
								-75.9375	0.393815	-94.2969	0.567684	-75.9375	0.0567799
								-75.4688	0.415576	-94.0234	0.579196	-75.4688	0.0621408
								-75	0.43767	-93.75	0.590626	-75	0.0679715
								-74.5312	0.460015	-93.4766	0.60196	-74.5312	0.0743059
								-74.0625	0.482522	-93.2031	0.61319	-74.0625	0.0811791
								-73.5938	0.5051	-92.9297	0.624303	-73.5938	0.0886273
								-73.125	0.527657	-92.6562	0.63529	-73.125	0.096687
								-72.6562	0.550101	-92.3828	0.646141	-72.6562	0.105395
								-72.1875	0.572344	-92.1094	0.656847	-72.1875	0.114787
								-71.7188	0.594298	-91.8359	0.667399	-71.7188	0.1249
								-71.25	0.615881	-91.5625	0.67779	-71.25	0.135767
								-70.7812	0.637017	-91.2891	0.688011	-70.7812	0.14742
								-70.3125	0.657637	-91.0156	0.698056	-70.3125	0.159888
								-69.8438	0.677678	-90.7422	0.707919	-69.8438	0.173196
								-69.375	0.697087	-90.4688	0.717594	-69.375	0.187365
								-68.9062	0.715816	-90.1953	0.727076	-68.9062	0.20241
								-68.4375	0.73383	-89.9219	0.736361	-68.4375	0.218338
								-67.9688	0.751099	-89.6484	0.745444	-67.9688	0.23515
								-67.5	0.767603	-89.375	0.754324	-67.5	0.252837
								-67.0312	0.783328	-89.1016	0.762997	-67.0312	0.271384
								-66.5625	0.798268	-88.8281	0.771461	-66.5625	0.290761
								-66.0938	0.812425	-88.5547	0.779715	-66.0938	0.310931
								-65.625	0.825805	-88.2812	0.787757	-65.625	0.331845
								-65.1562	0.838421	-88.0078	0.795588	-65.1562	0.353445
								-64.6875	0.850289	-87.7344	0.803207	-64.6875	0.375661
								-64.2188	0.861429	-87.4609	0.810614	-64.2188	0.398412
								-63.75	0.871865	-87.1875	0.817812	-63.75	0.42161
								-63.2812	0.881623	-86.9141	0.8248	-63.2812	0.44516
								-62.8125	0.890731	-86.6406	0.83158	-62.8125	0.468959
								-62.3438	0.899218	-86.3672	0.838155	-62.3438	0.4929
								-61.875	0.907115	-86.0938	0.844527	-61.875	0.516873
								-61.4062	0.914452	-85.8203	0.850699	-61.4062	0.540769
								-60.9375	0.92126	-85.5469	0.856672	-60.9375	0.564479
								-60.4688	0.927569	-85.2734	0.862451	-60.4688	0.587898
								-60	0.933409	-85	0.868039	-60	0.610925
								-59.5312	0.938809	-84.7266	0.873439	-59.5312	0.633468
								-59.0625	0.943798	-84.4531	0.878655	-59.0625	0.655442
								-58.5938	0.948402	-84.1797	0.883691	-58.5938	0.67677
								-58.125	0.952648	-83.9062	0.888551	-58.125	0.697388
								-57.6562	0.95656	-83.6328	0.893238	-57.6562	0.71724
								-57.1875	0.960163	-83.3594	0.897757	-57.1875	0.736282
								-56.7188	0.963479	-83.0859	0.902112	-56.7188	0.75448
								-56.25	0.966528	-82.8125	0.906307	-56.25	0.771812
								-55.7812	0.96933	-82.5391	0.910347	-55.7812	0.788264
								-55.3125	0.971905	-82.2656	0.914236	-55.3125	0.803832
								-54.8438	0.97427	-81.9922	0.917978	-54.8438	0.818518
								-54.375	0.97644	-81.7188	0.921578	-54.375	0.832334
								-53.9062	0.978431	-81.4453	0.925039	-53.9062	0.845297
								-53.4375	0.980257	-81.1719	0.928366	-53.4375	0.857429
								-52.9688	0.981932	-80.8984	0.931564	-52.9688	0.868758
								-52.5	0.983467	-80.625	0.934635	-52.5	0.879313
								-52.0312	0.984873	-80.3516	0.937585	-52.0312	0.889128
								-51.5625	0.986162	-80.0781	0.940418	-51.5625	0.898237
								-51.0938	0.987342	-79.8047	0.943137	-51.0938	0.906676
								-50.625	0.988423	-79.5312	0.945746	-50.625	0.914482
								-50.1562	0.989412	-79.2578	0.948249	-50.1562	0.921691
								-49.6875	0.990318	-78.9844	0.95065	-49.6875	0.92834
								-49.2188	0.991147	-78.7109	0.952953	-49.2188	0.934465
								-48.75	0.991905	-78.4375	0.955161	-48.75	0.9401
								-48.2812	0.9926	-78.1641	0.957277	-48.2812	0.945279
								-47.8125	0.993234	-77.8906	0.959305	-47.8125	0.950034
								-47.3438	0.993815	-77.6172	0.961248	-47.3438	0.954396
								-46.875	0.994346	-77.3438	0.96311	-46.875	0.958393
								-46.4062	0.994832	-77.0703	0.964893	-46.4062	0.962054
								-45.9375	0.995277	-76.7969	0.966601	-45.9375	0.965405
								-45.4688	0.995683	-76.5234	0.968237	-45.4688	0.968469
								-45	0.996054	-76.25	0.969803	-45	0.971271
								-44.5312	0.996394	-75.9766	0.971301	-44.5312	0.97383
								-44.0625	0.996704	-75.7031	0.972736	-44.0625	0.976166
								-43.5938	0.996988	-75.4297	0.974109	-43.5938	0.978299
								-43.125	0.997248	-75.1562	0.975423	-43.125	0.980244
								-42.6562	0.997485	-74.8828	0.97668	-42.6562	0.982019
								-42.1875	0.997702	-74.6094	0.977882	-42.1875	0.983637
								-41.7188	0.9979	-74.3359	0.979032	-41.7188	0.985111
								-41.25	0.998081	-74.0625	0.980132	-41.25	0.986454
								-40.7812	0.998246	-73.7891	0.981184	-40.7812	0.987678
								-40.3125	0.998397	-73.5156	0.98219	-40.3125	0.988792
								-39.8438	0.998536	-73.2422	0.983152	-39.8438	0.989807
								-39.375	0.998662	-72.9688	0.984072	-39.375	0.990731
								-38.9062	0.998777	-72.6953	0.984951	-38.9062	0.991571
								-38.4375	0.998883	-72.4219	0.985791	-38.4375	0.992336
								-37.9688	0.998979	-72.1484	0.986595	-37.9688	0.993032
								-37.5	0.999067	-71.875	0.987362	-37.5	0.993666
								-37.0312	0.999148	-71.6016	0.988096	-37.0312	0.994242
								-36.5625	0.999221	-71.3281	0.988797	-36.5625	0.994766
								-36.0938	0.999289	-71.0547	0.989467	-36.0938	0.995242
								-35.625	0.99935	-70.7812	0.990108	-35.625	0.995675
								-35.1562	0.999406	-70.5078	0.990719	-35.1562	0.996069
								-34.6875	0.999457	-70.2344	0.991304	-34.6875	0.996428
								-34.2188	0.999504	-69.9609	0.991862	-34.2188	0.996753
								-33.75	0.999547	-69.6875	0.992395	-33.75	0.997049
								-33.2812	0.999586	-69.4141	0.992905	-33.2812	0.997319
								-32.8125	0.999622	-69.1406	0.993392	-32.8125	0.997563
								-32.3438	0.999655	-68.8672	0.993856	-32.3438	0.997786
								-31.875	0.999684	-68.5938	0.9943	-31.875	0.997988
								-31.4062	0.999712	-68.3203	0.994724	-31.4062	0.998171
								-30.9375	0.999737	-68.0469	0.995129	-30.9375	0.998338
								-30.4688	0.999759	-67.7734	0.995516	-30.4688	0.99849
								-30	0.99978	-67.5	0.995885	-30	0.998628
								-29.5312	0.999799	-67.2266	0.996238	-29.5312	0.998753
								-29.0625	0.999816	-66.9531	0.996575	-29.0625	0.998867
								-28.5938	0.999832	-66.6797	0.996896	-28.5938	0.998971
								-28.125	0.999847	-66.4062	0.997204	-28.125	0.999065
								-27.6562	0.99986	-66.1328	0.997497	-27.6562	0.99915
								-27.1875	0.999872	-65.8594	0.997777	-27.1875	0.999228
								-26.7188	0.999883	-65.5859	0.998044	-26.7188	0.999299
								-26.25	0.999893	-65.3125	0.998299	-26.25	0.999363
								-25.7812	0.999902	-65.0391	0.998543	-25.7812	0.999421
								-25.3125	0.999911	-64.7656	0.998775	-25.3125	0.999474
								-24.8438	0.999919	-64.4922	0.998997	-24.8438	0.999522
								-24.375	0.999926	-64.2188	0.999209	-24.375	0.999566
								-23.9062	0.999932	-63.9453	0.999412	-23.9062	0.999605
								-23.4375	0.999938	-63.6719	0.999605	-23.4375	0.999641
								-22.9688	0.999943	-63.3984	0.999789	-22.9688	0.999674
								-22.5	0.999948	-63.125	0.999965	-22.5	0.999704
								-22.0312	0.999953	-62.8516	1.00013	-22.0312	0.999731
								-21.5625	0.999957	-62.5781	1.00029	-21.5625	0.999756
								-21.0938	0.99996	-62.3047	1.00045	-21.0938	0.999778
								-20.625	0.999964	-62.0312	1.00059	-20.625	0.999798
								-20.1562	0.999967	-61.7578	1.00073	-20.1562	0.999817
								-19.6875	0.99997	-61.4844	1.00087	-19.6875	0.999834
								-19.2188	0.999972	-61.2109	1.00099	-19.2188	0.999849
								-18.75	0.999975	-60.9375	1.00111	-18.75	0.999863
								-18.2812	0.999977	-60.6641	1.00123	-18.2812	0.999875
								-17.8125	0.999979	-60.3906	1.00134	-17.8125	0.999887
								-17.3438	0.999981	-60.1172	1.00145	-17.3438	0.999897
								-16.875	0.999982	-59.8438	1.00155	-16.875	0.999906
								-16.4062	0.999984	-59.5703	1.00164	-16.4062	0.999915
								-15.9375	0.999985	-59.2969	1.00173	-15.9375	0.999923
								-15.4688	0.999987	-59.0234	1.00182	-15.4688	0.99993
								-15	0.999988	-58.75	1.00191	-15	0.999936
								-14.5312	0.999989	-58.4766	1.00199	-14.5312	0.999942
								-14.0625	0.99999	-58.2031	1.00206	-14.0625	0.999947
								-13.5938	0.999991	-57.9297	1.00213	-13.5938	0.999952
								-13.125	0.999991	-57.6562	1.0022	-13.125	0.999957
								-12.6562	0.999992	-57.3828	1.00227	-12.6562	0.999961
								-12.1875	0.999993	-57.1094	1.00233	-12.1875	0.999964
								-11.7188	0.999994	-56.8359	1.00239	-11.7188	0.999967
								-11.25	0.999994	-56.5625	1.00245	-11.25	0.99997
								-10.7812	0.999995	-56.2891	1.0025	-10.7812	0.999973
								-10.3125	0.999995	-56.0156	1.00256	-10.3125	0.999976
								-9.84375	0.999995	-55.7422	1.00261	-9.84375	0.999978
								-9.375	0.999996	-55.4688	1.00265	-9.375	0.99998
								-8.90625	0.999996	-55.1953	1.0027	-8.90625	0.999982
								-8.4375	0.999997	-54.9219	1.00274	-8.4375	0.999983
								-7.96875	0.999997	-54.6484	1.00279	-7.96875	0.999985
								-7.5	0.999997	-54.375	1.00282	-7.5	0.999986
								-7.03125	0.999997	-54.1016	1.00286	-7.03125	0.999988
								-6.5625	0.999998	-53.8281	1.0029	-6.5625	0.999989
								-6.09375	0.999998	-53.5547	1.00293	-6.09375	0.99999
								-5.625	0.999998	-53.2812	1.00297	-5.625	0.999991
								-5.15625	0.999998	-53.0078	1.003	-5.15625	0.999991
								-4.6875	0.999998	-52.7344	1.00303	-4.6875	0.999992
								-4.21875	0.999998	-52.4609	1.00306	-4.21875	0.999993
								-3.75	0.999999	-52.1875	1.00308	-3.75	0.999994
								-3.28125	0.999999	-51.9141	1.00311	-3.28125	0.999994
								-2.8125	0.999999	-51.6406	1.00313	-2.8125	0.999995
								-2.34375	0.999999	-51.3672	1.00316	-2.34375	0.999995
								-1.875	0.999999	-51.0938	1.00318	-1.875	0.999996
								-1.40625	0.999999	-50.8203	1.0032	-1.40625	0.999996
								-0.9375	0.999999	-50.5469	1.00322	-0.9375	0.999996
								-0.46875	0.999999	-50.2734	1.00324	-0.46875	0.999997
								0	0.999999	-50	1.00326	0	0.999997

## Sheet: Supplement 5D
Normalized current								Fitted curves
	T220A background		D93A		I228G			T220A background		D93A		I228G
Conditioning voltage (mV)	Mean	SEM	Mean	SEM	Mean	SEM		Conditioning voltage (mV)	Current	Conditioning voltage (mV)	Current	Conditioning voltage (mV)	Current
-120	1	0	0.958577	0.0414226	1	0		-120	1.0035	-120	0.976757	-120	1.00536
-110	1	0	0.990605	0.00939509	0.99719	0.00281033		-119.531	1.00345	-119.609	0.976757	-119.531	1.00531
-100	0.998416	0.00158359	0.976652	0.0233483	0.998793	0.00120696		-119.062	1.0034	-119.219	0.976757	-119.062	1.00527
-90	0.997813	0.00212599	0.962699	0.0373015	0.995874	0.0028503		-118.594	1.00335	-118.828	0.976757	-118.594	1.00523
-80	0.994733	0.00443494	0.981349	0.0186507	0.993536	0.00469573		-118.125	1.00329	-118.438	0.976757	-118.125	1.00518
-70	0.972057	0.00833177	0.982551	0.0174489	0.970218	0.0143863		-117.656	1.00324	-118.047	0.976756	-117.656	1.00513
-60	0.949149	0.0161137	0.983303	0.00775758	0.928364	0.0160019		-117.188	1.00318	-117.656	0.976756	-117.188	1.00508
-50	0.92454	0.0230758	0.943601	0.0241007	0.843082	0.0199201		-116.719	1.00312	-117.266	0.976756	-116.719	1.00503
-40	0.902031	0.0267756	0.911283	0.0428738	0.796401	0.0241708		-116.25	1.00306	-116.875	0.976756	-116.25	1.00497
-30	0.880374	0.0303926	0.888032	0.054882	0.771346	0.0286663		-115.781	1.003	-116.484	0.976756	-115.781	1.00492
-20	0.865399	0.0308134	0.878181	0.100489	0.738367	0.0299425		-115.312	1.00294	-116.094	0.976756	-115.312	1.00486
-10	0.850312	0.0333314			0.704255	0.0317347		-114.844	1.00287	-115.703	0.976756	-114.844	1.0048
0	0.841334	0.0360898			0.68211	0.026726		-114.375	1.0028	-115.312	0.976756	-114.375	1.00474
								-113.906	1.00273	-114.922	0.976756	-113.906	1.00468
								-113.438	1.00266	-114.531	0.976756	-113.438	1.00461
								-112.969	1.00259	-114.141	0.976756	-112.969	1.00454
								-112.5	1.00251	-113.75	0.976756	-112.5	1.00447
								-112.031	1.00243	-113.359	0.976756	-112.031	1.00439
								-111.562	1.00235	-112.969	0.976756	-111.562	1.00432
								-111.094	1.00227	-112.578	0.976756	-111.094	1.00424
								-110.625	1.00219	-112.188	0.976756	-110.625	1.00415
								-110.156	1.0021	-111.797	0.976756	-110.156	1.00407
								-109.688	1.00201	-111.406	0.976756	-109.688	1.00398
								-109.219	1.00191	-111.016	0.976756	-109.219	1.00389
								-108.75	1.00182	-110.625	0.976756	-108.75	1.00379
								-108.281	1.00172	-110.234	0.976756	-108.281	1.00369
								-107.812	1.00162	-109.844	0.976756	-107.812	1.00359
								-107.344	1.00152	-109.453	0.976756	-107.344	1.00349
								-106.875	1.00141	-109.062	0.976756	-106.875	1.00338
								-106.406	1.0013	-108.672	0.976756	-106.406	1.00326
								-105.938	1.00118	-108.281	0.976756	-105.938	1.00314
								-105.469	1.00107	-107.891	0.976756	-105.469	1.00302
								-105	1.00095	-107.5	0.976756	-105	1.0029
								-104.531	1.00082	-107.109	0.976756	-104.531	1.00276
								-104.062	1.0007	-106.719	0.976756	-104.062	1.00263
								-103.594	1.00057	-106.328	0.976756	-103.594	1.00249
								-103.125	1.00043	-105.938	0.976756	-103.125	1.00234
								-102.656	1.00029	-105.547	0.976755	-102.656	1.00219
								-102.188	1.00015	-105.156	0.976755	-102.188	1.00203
								-101.719	1	-104.766	0.976755	-101.719	1.00187
								-101.25	0.999853	-104.375	0.976755	-101.25	1.0017
								-100.781	0.999698	-103.984	0.976755	-100.781	1.00153
								-100.312	0.999539	-103.594	0.976755	-100.312	1.00135
								-99.8438	0.999375	-103.203	0.976755	-99.8438	1.00116
								-99.375	0.999207	-102.812	0.976755	-99.375	1.00097
								-98.9062	0.999034	-102.422	0.976755	-98.9062	1.00077
								-98.4375	0.998856	-102.031	0.976754	-98.4375	1.00056
								-97.9688	0.998673	-101.641	0.976754	-97.9688	1.00035
								-97.5	0.998484	-101.25	0.976754	-97.5	1.00012
								-97.0312	0.998291	-100.859	0.976754	-97.0312	0.999893
								-96.5625	0.998092	-100.469	0.976754	-96.5625	0.999655
								-96.0938	0.997888	-100.078	0.976753	-96.0938	0.999408
								-95.625	0.997678	-99.6875	0.976753	-95.625	0.999153
								-95.1562	0.997462	-99.2969	0.976753	-95.1562	0.998888
								-94.6875	0.997241	-98.9062	0.976753	-94.6875	0.998614
								-94.2188	0.997013	-98.5156	0.976752	-94.2188	0.998331
								-93.75	0.996779	-98.125	0.976752	-93.75	0.998037
								-93.2812	0.996539	-97.7344	0.976752	-93.2812	0.997734
								-92.8125	0.996292	-97.3438	0.976751	-92.8125	0.99742
								-92.3438	0.996038	-96.9531	0.976751	-92.3438	0.997094
								-91.875	0.995778	-96.5625	0.97675	-91.875	0.996758
								-91.4062	0.99551	-96.1719	0.97675	-91.4062	0.99641
								-90.9375	0.995235	-95.7812	0.976749	-90.9375	0.99605
								-90.4688	0.994954	-95.3906	0.976749	-90.4688	0.995677
								-90	0.994664	-95	0.976748	-90	0.995292
								-89.5312	0.994367	-94.6094	0.976748	-89.5312	0.994894
								-89.0625	0.994062	-94.2188	0.976747	-89.0625	0.994481
								-88.5938	0.993749	-93.8281	0.976746	-88.5938	0.994055
								-88.125	0.993428	-93.4375	0.976745	-88.125	0.993614
								-87.6562	0.993098	-93.0469	0.976745	-87.6562	0.993159
								-87.1875	0.99276	-92.6562	0.976744	-87.1875	0.992688
								-86.7188	0.992413	-92.2656	0.976743	-86.7188	0.992201
								-86.25	0.992057	-91.875	0.976742	-86.25	0.991698
								-85.7812	0.991692	-91.4844	0.976741	-85.7812	0.991178
								-85.3125	0.991318	-91.0938	0.976739	-85.3125	0.99064
								-84.8438	0.990935	-90.7031	0.976738	-84.8438	0.990085
								-84.375	0.990541	-90.3125	0.976737	-84.375	0.989511
								-83.9062	0.990138	-89.9219	0.976735	-83.9062	0.988919
								-83.4375	0.989725	-89.5312	0.976734	-83.4375	0.988307
								-82.9688	0.989302	-89.1406	0.976732	-82.9688	0.987675
								-82.5	0.988868	-88.75	0.97673	-82.5	0.987023
								-82.0312	0.988424	-88.3594	0.976728	-82.0312	0.986349
								-81.5625	0.987969	-87.9688	0.976726	-81.5625	0.985654
								-81.0938	0.987503	-87.5781	0.976724	-81.0938	0.984937
								-80.625	0.987026	-87.1875	0.976721	-80.625	0.984197
								-80.1562	0.986537	-86.7969	0.976718	-80.1562	0.983433
								-79.6875	0.986037	-86.4062	0.976715	-79.6875	0.982645
								-79.2188	0.985526	-86.0156	0.976712	-79.2188	0.981833
								-78.75	0.985002	-85.625	0.976709	-78.75	0.980995
								-78.2812	0.984466	-85.2344	0.976705	-78.2812	0.980132
								-77.8125	0.983919	-84.8438	0.976702	-77.8125	0.979242
								-77.3438	0.983358	-84.4531	0.976697	-77.3438	0.978324
								-76.875	0.982786	-84.0625	0.976693	-76.875	0.977379
								-76.4062	0.9822	-83.6719	0.976688	-76.4062	0.976406
								-75.9375	0.981602	-83.2812	0.976683	-75.9375	0.975404
								-75.4688	0.98099	-82.8906	0.976677	-75.4688	0.974371
								-75	0.980366	-82.5	0.976672	-75	0.973309
								-74.5312	0.979728	-82.1094	0.976665	-74.5312	0.972216
								-74.0625	0.979077	-81.7188	0.976658	-74.0625	0.971091
								-73.5938	0.978412	-81.3281	0.976651	-73.5938	0.969934
								-73.125	0.977733	-80.9375	0.976643	-73.125	0.968744
								-72.6562	0.977041	-80.5469	0.976634	-72.6562	0.967521
								-72.1875	0.976335	-80.1562	0.976625	-72.1875	0.966264
								-71.7188	0.975614	-79.7656	0.976615	-71.7188	0.964972
								-71.25	0.97488	-79.375	0.976604	-71.25	0.963645
								-70.7812	0.974131	-78.9844	0.976593	-70.7812	0.962283
								-70.3125	0.973368	-78.5938	0.976581	-70.3125	0.960885
								-69.8438	0.972591	-78.2031	0.976567	-69.8438	0.95945
								-69.375	0.971799	-77.8125	0.976553	-69.375	0.957978
								-68.9062	0.970993	-77.4219	0.976538	-68.9062	0.956468
								-68.4375	0.970173	-77.0312	0.976521	-68.4375	0.95492
								-67.9688	0.969337	-76.6406	0.976504	-67.9688	0.953334
								-67.5	0.968488	-76.25	0.976485	-67.5	0.951709
								-67.0312	0.967624	-75.8594	0.976464	-67.0312	0.950046
								-66.5625	0.966746	-75.4688	0.976442	-66.5625	0.948343
								-66.0938	0.965853	-75.0781	0.976419	-66.0938	0.9466
								-65.625	0.964946	-74.6875	0.976393	-65.625	0.944817
								-65.1562	0.964024	-74.2969	0.976366	-65.1562	0.942995
								-64.6875	0.963088	-73.9062	0.976337	-64.6875	0.941132
								-64.2188	0.962139	-73.5156	0.976305	-64.2188	0.939229
								-63.75	0.961175	-73.125	0.976271	-63.75	0.937286
								-63.2812	0.960197	-72.7344	0.976235	-63.2812	0.935303
								-62.8125	0.959206	-72.3438	0.976196	-62.8125	0.93328
								-62.3438	0.958201	-71.9531	0.976154	-62.3438	0.931216
								-61.875	0.957182	-71.5625	0.976108	-61.875	0.929113
								-61.4062	0.956151	-71.1719	0.97606	-61.4062	0.926971
								-60.9375	0.955106	-70.7812	0.976008	-60.9375	0.924789
								-60.4688	0.954049	-70.3906	0.975952	-60.4688	0.922569
								-60	0.952979	-70	0.975892	-60	0.920311
								-59.5312	0.951897	-69.6094	0.975827	-59.5312	0.918014
								-59.0625	0.950803	-69.2188	0.975758	-59.0625	0.915681
								-58.5938	0.949697	-68.8281	0.975683	-58.5938	0.913311
								-58.125	0.94858	-68.4375	0.975603	-58.125	0.910905
								-57.6562	0.947452	-68.0469	0.975517	-57.6562	0.908464
								-57.1875	0.946313	-67.6562	0.975425	-57.1875	0.905989
								-56.7188	0.945164	-67.2656	0.975326	-56.7188	0.903481
								-56.25	0.944005	-66.875	0.97522	-56.25	0.900941
								-55.7812	0.942836	-66.4844	0.975106	-55.7812	0.898369
								-55.3125	0.941658	-66.0938	0.974984	-55.3125	0.895768
								-54.8438	0.940472	-65.7031	0.974852	-54.8438	0.893138
								-54.375	0.939277	-65.3125	0.974712	-54.375	0.890481
								-53.9062	0.938074	-64.9219	0.974561	-53.9062	0.887797
								-53.4375	0.936864	-64.5312	0.9744	-53.4375	0.885089
								-52.9688	0.935647	-64.1406	0.974226	-52.9688	0.882358
								-52.5	0.934424	-63.75	0.974041	-52.5	0.879605
								-52.0312	0.933195	-63.3594	0.973842	-52.0312	0.876831
								-51.5625	0.93196	-62.9688	0.973629	-51.5625	0.87404
								-51.0938	0.930721	-62.5781	0.973402	-51.0938	0.871231
								-50.625	0.929477	-62.1875	0.973158	-50.625	0.868408
								-50.1562	0.928229	-61.7969	0.972898	-50.1562	0.86557
								-49.6875	0.926978	-61.4062	0.972619	-49.6875	0.862722
								-49.2188	0.925725	-61.0156	0.972321	-49.2188	0.859863
								-48.75	0.924469	-60.625	0.972003	-48.75	0.856997
								-48.2812	0.923211	-60.2344	0.971663	-48.2812	0.854124
								-47.8125	0.921953	-59.8438	0.971301	-47.8125	0.851248
								-47.3438	0.920694	-59.4531	0.970914	-47.3438	0.848369
								-46.875	0.919435	-59.0625	0.970502	-46.875	0.845489
								-46.4062	0.918177	-58.6719	0.970063	-46.4062	0.842611
								-45.9375	0.91692	-58.2812	0.969595	-45.9375	0.839737
								-45.4688	0.915664	-57.8906	0.969098	-45.4688	0.836867
								-45	0.914411	-57.5	0.968569	-45	0.834005
								-44.5312	0.913161	-57.1094	0.968008	-44.5312	0.831152
								-44.0625	0.911914	-56.7188	0.967412	-44.0625	0.828309
								-43.5938	0.910672	-56.3281	0.966779	-43.5938	0.825479
								-43.125	0.909433	-55.9375	0.96611	-43.125	0.822663
								-42.6562	0.9082	-55.5469	0.965401	-42.6562	0.819864
								-42.1875	0.906972	-55.1562	0.964652	-42.1875	0.817082
								-41.7188	0.90575	-54.7656	0.96386	-41.7188	0.814319
								-41.25	0.904535	-54.375	0.963026	-41.25	0.811578
								-40.7812	0.903327	-53.9844	0.962146	-40.7812	0.808859
								-40.3125	0.902126	-53.5938	0.961222	-40.3125	0.806164
								-39.8438	0.900933	-53.2031	0.96025	-39.8438	0.803495
								-39.375	0.899748	-52.8125	0.95923	-39.375	0.800852
								-38.9062	0.898573	-52.4219	0.958163	-38.9062	0.798238
								-38.4375	0.897406	-52.0312	0.957046	-38.4375	0.795652
								-37.9688	0.896249	-51.6406	0.95588	-37.9688	0.793098
								-37.5	0.895103	-51.25	0.954665	-37.5	0.790575
								-37.0312	0.893966	-50.8594	0.953401	-37.0312	0.788085
								-36.5625	0.892841	-50.4688	0.952089	-36.5625	0.785628
								-36.0938	0.891726	-50.0781	0.950729	-36.0938	0.783206
								-35.625	0.890623	-49.6875	0.949323	-35.625	0.78082
								-35.1562	0.889532	-49.2969	0.947872	-35.1562	0.77847
								-34.6875	0.888453	-48.9062	0.946378	-34.6875	0.776156
								-34.2188	0.887386	-48.5156	0.944843	-34.2188	0.77388
								-33.75	0.886332	-48.125	0.943269	-33.75	0.771642
								-33.2812	0.88529	-47.7344	0.94166	-33.2812	0.769443
								-32.8125	0.884262	-47.3438	0.940019	-32.8125	0.767283
								-32.3438	0.883247	-46.9531	0.938348	-32.3438	0.765162
								-31.875	0.882245	-46.5625	0.936653	-31.875	0.76308
								-31.4062	0.881257	-46.1719	0.934936	-31.4062	0.761039
								-30.9375	0.880282	-45.7812	0.933202	-30.9375	0.759037
								-30.4688	0.879322	-45.3906	0.931456	-30.4688	0.757076
								-30	0.878376	-45	0.929702	-30	0.755155
								-29.5312	0.877443	-44.6094	0.927944	-29.5312	0.753274
								-29.0625	0.876525	-44.2188	0.926188	-29.0625	0.751433
								-28.5938	0.875621	-43.8281	0.924438	-28.5938	0.749632
								-28.125	0.874732	-43.4375	0.922697	-28.125	0.747871
								-27.6562	0.873857	-43.0469	0.920972	-27.6562	0.74615
								-27.1875	0.872997	-42.6562	0.919266	-27.1875	0.744468
								-26.7188	0.872151	-42.2656	0.917583	-26.7188	0.742826
								-26.25	0.871319	-41.875	0.915928	-26.25	0.741222
								-25.7812	0.870502	-41.4844	0.914303	-25.7812	0.739657
								-25.3125	0.869699	-41.0938	0.912712	-25.3125	0.73813
								-24.8438	0.868911	-40.7031	0.911159	-24.8438	0.736641
								-24.375	0.868137	-40.3125	0.909645	-24.375	0.735189
								-23.9062	0.867378	-39.9219	0.908173	-23.9062	0.733774
								-23.4375	0.866632	-39.5312	0.906746	-23.4375	0.732395
								-22.9688	0.865901	-39.1406	0.905364	-22.9688	0.731052
								-22.5	0.865184	-38.75	0.904029	-22.5	0.729745
								-22.0312	0.864481	-38.3594	0.902742	-22.0312	0.728472
								-21.5625	0.863792	-37.9688	0.901504	-21.5625	0.727234
								-21.0938	0.863117	-37.5781	0.900315	-21.0938	0.726029
								-20.625	0.862455	-37.1875	0.899175	-20.625	0.724857
								-20.1562	0.861807	-36.7969	0.898084	-20.1562	0.723717
								-19.6875	0.861172	-36.4062	0.897042	-19.6875	0.72261
								-19.2188	0.860551	-36.0156	0.896048	-19.2188	0.721533
								-18.75	0.859943	-35.625	0.895101	-18.75	0.720487
								-18.2812	0.859348	-35.2344	0.894201	-18.2812	0.719471
								-17.8125	0.858765	-34.8438	0.893345	-17.8125	0.718485
								-17.3438	0.858196	-34.4531	0.892534	-17.3438	0.717527
								-16.875	0.857638	-34.0625	0.891765	-16.875	0.716597
								-16.4062	0.857093	-33.6719	0.891037	-16.4062	0.715695
								-15.9375	0.856561	-33.2812	0.890349	-15.9375	0.714819
								-15.4688	0.85604	-32.8906	0.889699	-15.4688	0.71397
								-15	0.855531	-32.5	0.889086	-15	0.713146
								-14.5312	0.855034	-32.1094	0.888509	-14.5312	0.712347
								-14.0625	0.854548	-31.7188	0.887964	-14.0625	0.711572
								-13.5938	0.854074	-31.3281	0.887452	-13.5938	0.710821
								-13.125	0.85361	-30.9375	0.886971	-13.125	0.710094
								-12.6562	0.853158	-30.5469	0.886519	-12.6562	0.709388
								-12.1875	0.852716	-30.1562	0.886094	-12.1875	0.708705
								-11.7188	0.852285	-29.7656	0.885695	-11.7188	0.708043
								-11.25	0.851864	-29.375	0.885322	-11.25	0.707402
								-10.7812	0.851453	-28.9844	0.884971	-10.7812	0.706781
								-10.3125	0.851053	-28.5938	0.884643	-10.3125	0.70618
								-9.84375	0.850662	-28.2031	0.884336	-9.84375	0.705598
								-9.375	0.85028	-27.8125	0.884049	-9.375	0.705034
								-8.90625	0.849908	-27.4219	0.88378	-8.90625	0.704489
								-8.4375	0.849546	-27.0312	0.883528	-8.4375	0.703961
								-7.96875	0.849192	-26.6406	0.883293	-7.96875	0.70345
								-7.5	0.848847	-26.25	0.883073	-7.5	0.702956
								-7.03125	0.848511	-25.8594	0.882868	-7.03125	0.702478
								-6.5625	0.848184	-25.4688	0.882677	-6.5625	0.702015
								-6.09375	0.847865	-25.0781	0.882498	-6.09375	0.701568
								-5.625	0.847554	-24.6875	0.882331	-5.625	0.701135
								-5.15625	0.84725	-24.2969	0.882175	-5.15625	0.700716
								-4.6875	0.846955	-23.9062	0.88203	-4.6875	0.700312
								-4.21875	0.846667	-23.5156	0.881894	-4.21875	0.69992
								-3.75	0.846387	-23.125	0.881768	-3.75	0.699542
								-3.28125	0.846114	-22.7344	0.88165	-3.28125	0.699176
								-2.8125	0.845849	-22.3438	0.88154	-2.8125	0.698823
								-2.34375	0.84559	-21.9531	0.881438	-2.34375	0.698481
								-1.875	0.845338	-21.5625	0.881343	-1.875	0.698151
								-1.40625	0.845092	-21.1719	0.881254	-1.40625	0.697832
								-0.9375	0.844854	-20.7812	0.881171	-0.9375	0.697523
								-0.46875	0.844621	-20.3906	0.881094	-0.46875	0.697225
								0	0.844395	-20	0.881022	0	0.696937
