# Supplementary material for: Mechanosensitive pore opening of a prokaryotic voltage-gated sodium channel
Source: eLife. 2023 Mar 13;12:e79271. doi: 10.7554/eLife.79271 (PMC10038658; doi:10.7554/eLife.79271)
Supplement: Figure 5—source data 3. [file elife-79271-fig5-data3.xlsx]

## Sheet: Supplement 5A-2
Change (difference) in open probability from pre-control
T220A background	-10 mmHg			-30 mmHg			-50 mmHg				I228G	-10 mmHg			-30 mmHg			-50 mmHg
Voltage (mV)	n (cells)	∆Po	SEM	n (cells)	∆Po	SEM	n (cells)	∆Po	SEM		Voltage (mV)	n (cells)	∆Po	SEM	n (cells)	∆Po	SEM	n (cells)	∆Po	SEM
-100	11	0.00412418	0.00234599	9	0.00412418	0.0346944	8	0.00412418	0.0113638		-100	12	-0.00211111	0.00123269	8	-0.00185945	0.00373851	11	-0.00304957	0.00449974
-80	12	0.0050432	0.00453132	8	0.00661376	0.0267603	7	0.0191153	0.0154701		-80	12	0.00328303	0.00213214	8	0.00961396	0.00512614	11	0.0244644	0.00777918
-60	7	0.0955562	0.0434654	21	0.110824	0.0193449	9	0.157363	0.0198353		-60	10	0.0136627	0.0106287	8	0.000447929	0.00614842	11	0.0344735	0.0183169
-40	11	0.0899219	0.0247307	7	0.138013	0.0366103	11	0.185098	0.0490727		-40	11	0.0121319	0.0105445	8	-0.00171291	0.0164158	11	-0.000568298	0.0159727
-20	11	0.0256749	0.0102727	10	0.0691861	0.0358219	6	0.065446	0.029966		-20	10	-0.0121307	0.0104575	8	-0.014806	0.0102559	11	-0.0107467	0.0239465

## Sheet: Supplement 5C-2
Macroscopic currents normalized to peak of control (0 mmHg)										Fitted curves
	T220A background (n=10)				I228G (n=7)						T220A background		I228G
Voltage (mV)	0 mmHg	SEM	-30 mmHg	SEM	0 mmHg	SEM	-30 mmHg	SEM		Voltage (mV)	0 mmHg	-30 mmHg	0 mmHg	-30 mmHg
-100	-0.00986175	0.0154099	-0.0273843	0.0140218	-0.0385908	0.0184124	-0.0421452	0.02613		-100	-0.000140875	-0.00098312	-5.01813e-06	-0.000193721
-90	-0.0561423	0.0343306	-0.065696	0.0375432	-0.0331533	0.0155059	-0.0633275	0.018708		-98.9899	-0.000184671	-0.00126539	-8.48419e-06	-0.000293698
-80	-0.0320691	0.0117395	-0.137292	0.0614376	-0.0631541	0.0191851	-0.117394	0.0495913		-97.9798	-0.000241586	-0.00162374	-1.4292e-05	-0.000442647
-70	-0.147047	0.0734044	-0.272797	0.103641	-0.343362	0.128517	-0.528827	0.106053		-96.9697	-0.000315354	-0.00207689	-2.39766e-05	-0.000662839
-60	-0.309334	0.0872857	-0.513859	0.129272	-0.784448	0.0931789	-0.805819	0.111662		-95.9596	-0.000410697	-0.00264754	-4.00364e-05	-0.000985596
-50	-0.595097	0.094202	-0.930592	0.119135	-0.896397	0.0391851	-0.949363	0.0415492		-94.9495	-0.000533555	-0.00336303	-6.65035e-05	-0.00145435
-40	-0.93475	0.0188476	-1.07405	0.0268959	-0.853168	0.0524564	-0.847491	0.0651443		-93.9394	-0.000691369	-0.00425604	-0.000109817	-0.00212836
-30	-0.923582	0.0312253	-0.971593	0.0140456	-0.727914	0.0659512	-0.759388	0.0503172		-92.9293	-0.000893405	-0.00536527	-0.000180146	-0.00308709
-20	-0.863008	0.0355611	-0.847906	0.0428795	-0.645563	0.0627712	-0.648415	0.0584916		-91.9192	-0.00115114	-0.00673619	-0.000293337	-0.00443507
-10	-0.707589	0.0556138	-0.713647	0.0480597	-0.519796	0.0594345	-0.559912	0.0577627		-90.9091	-0.0014787	-0.0084217	-0.000473736	-0.00630688
0	-0.623457	0.0560251	-0.60776	0.0449029	-0.411013	0.070382	-0.407192	0.0690614		-89.899	-0.00189335	-0.0104827	-0.000758129	-0.0088719
										-88.8889	-0.00241608	-0.0129887	-0.00120109	-0.0123378
										-87.8788	-0.00307218	-0.016018	-0.00188191	-0.0169522
										-86.8687	-0.00389191	-0.0196574	-0.00291321	-0.0230011
										-85.8586	-0.00491116	-0.0240026	-0.00445082	-0.0308032
										-84.8485	-0.00617213	-0.0291571	-0.0067043	-0.0406996
										-83.8384	-0.00772398	-0.0352311	-0.00994652	-0.053038
										-82.8283	-0.00962337	-0.04234	-0.0145202	-0.0681525
										-81.8182	-0.011935	-0.0506022	-0.0208388	-0.0863395
										-80.8081	-0.0147316	-0.0601369	-0.0293784	-0.107832
										-79.798	-0.0180945	-0.0710607	-0.0406585	-0.132776
										-78.7879	-0.0221129	-0.0834844	-0.0552105	-0.161209
										-77.7778	-0.0268833	-0.0975093	-0.0735342	-0.193047
										-76.7677	-0.0325087	-0.113223	-0.0960474	-0.228077
										-75.7576	-0.0390969	-0.130697	-0.123033	-0.265967
										-74.7475	-0.0467587	-0.14998	-0.154593	-0.306272
										-73.7374	-0.0556054	-0.171099	-0.190617	-0.34846
										-72.7273	-0.0657461	-0.194053	-0.230769	-0.391938
										-71.7172	-0.0772841	-0.218812	-0.274499	-0.436081
										-70.7071	-0.0903137	-0.245317	-0.321075	-0.480262
										-69.697	-0.104917	-0.273478	-0.369634	-0.52388
										-68.6869	-0.121159	-0.303178	-0.419239	-0.56638
										-67.6768	-0.139085	-0.334269	-0.468944	-0.607274
										-66.6667	-0.158719	-0.366582	-0.517846	-0.646147
										-65.6566	-0.180058	-0.399922	-0.565133	-0.68267
										-64.6465	-0.203073	-0.434079	-0.610113	-0.716592
										-63.6364	-0.227706	-0.46883	-0.652236	-0.747745
										-62.6263	-0.25387	-0.503943	-0.691096	-0.776029
										-61.6161	-0.281453	-0.539179	-0.726427	-0.801411
										-60.606	-0.310314	-0.574305	-0.758088	-0.823911
										-59.5959	-0.340291	-0.609089	-0.786048	-0.843594
										-58.5858	-0.3712	-0.64331	-0.810365	-0.86056
										-57.5757	-0.40284	-0.676759	-0.831166	-0.874933
										-56.5656	-0.435	-0.709242	-0.848629	-0.88686
										-55.5555	-0.467461	-0.740582	-0.862966	-0.896496
										-54.5454	-0.499997	-0.770624	-0.874409	-0.904002
										-53.5353	-0.532388	-0.79923	-0.8832	-0.909543
										-52.5252	-0.564416	-0.826285	-0.889581	-0.913281
										-51.5151	-0.595873	-0.851694	-0.893788	-0.91537
										-50.505	-0.626563	-0.875382	-0.896047	-0.915962
										-49.4949	-0.656306	-0.897295	-0.896568	-0.915197
										-48.4848	-0.684937	-0.917396	-0.895547	-0.913207
										-47.4747	-0.712311	-0.935666	-0.893164	-0.910117
										-46.4646	-0.738301	-0.9521	-0.88958	-0.906038
										-45.4545	-0.762802	-0.966709	-0.884944	-0.901075
										-44.4444	-0.785727	-0.979515	-0.879385	-0.895323
										-43.4343	-0.807009	-0.990551	-0.873021	-0.888866
										-42.4242	-0.826599	-0.999858	-0.865954	-0.881784
										-41.4141	-0.844467	-1.00749	-0.858276	-0.874145
										-40.404	-0.860596	-1.01349	-0.850068	-0.866012
										-39.3939	-0.874986	-1.01794	-0.8414	-0.857443
										-38.3838	-0.88765	-1.02088	-0.832332	-0.848486
										-37.3737	-0.898611	-1.0224	-0.822919	-0.839188
										-36.3636	-0.907903	-1.02255	-0.813208	-0.829587
										-35.3535	-0.915568	-1.0214	-0.803239	-0.819719
										-34.3434	-0.921654	-1.01903	-0.793047	-0.809616
										-33.3333	-0.926216	-1.0155	-0.782663	-0.799306
										-32.3232	-0.929314	-1.01088	-0.772114	-0.788813
										-31.3131	-0.931008	-1.00524	-0.761422	-0.778159
										-30.303	-0.931363	-0.99863	-0.750607	-0.767364
										-29.2929	-0.930444	-0.991121	-0.739686	-0.756445
										-28.2828	-0.928318	-0.982771	-0.728674	-0.745416
										-27.2727	-0.925049	-0.973635	-0.717584	-0.734291
										-26.2626	-0.920702	-0.963767	-0.706427	-0.723082
										-25.2525	-0.915341	-0.953218	-0.695212	-0.711799
										-24.2424	-0.909029	-0.942036	-0.683947	-0.70045
										-23.2323	-0.901824	-0.930267	-0.67264	-0.689045
										-22.2222	-0.893784	-0.917954	-0.661295	-0.67759
										-21.2121	-0.884966	-0.905136	-0.64992	-0.66609
										-20.202	-0.875422	-0.891853	-0.638517	-0.654553
										-19.1919	-0.865202	-0.878139	-0.627092	-0.642981
										-18.1818	-0.854355	-0.864028	-0.615646	-0.63138
										-17.1717	-0.842925	-0.84955	-0.604183	-0.619754
										-16.1616	-0.830955	-0.834734	-0.592706	-0.608104
										-15.1515	-0.818485	-0.819607	-0.581216	-0.596435
										-14.1414	-0.805554	-0.804194	-0.569716	-0.584748
										-13.1313	-0.792195	-0.788517	-0.558206	-0.573047
										-12.1212	-0.778443	-0.772599	-0.546689	-0.561332
										-11.1111	-0.764327	-0.756458	-0.535164	-0.549605
										-10.101	-0.749877	-0.740114	-0.523634	-0.537868
										-9.09088	-0.735119	-0.723582	-0.512099	-0.526123
										-8.08078	-0.720078	-0.706879	-0.50056	-0.514369
										-7.07068	-0.704777	-0.690019	-0.489017	-0.502609
										-6.06058	-0.689237	-0.673015	-0.477472	-0.490843
										-5.05048	-0.673478	-0.65588	-0.465923	-0.479072
										-4.04038	-0.657518	-0.638624	-0.454372	-0.467296
										-3.03028	-0.641373	-0.621258	-0.44282	-0.455516
										-2.02017	-0.62506	-0.603791	-0.431265	-0.443733
										-1.01007	-0.608592	-0.586232	-0.41971	-0.431947
										2.69413e-05	-0.591983	-0.56859	-0.408153	-0.420159
