# Supplementary figures and images for: Mechanosensitive pore opening of a prokaryotic voltage-gated sodium channel
Source: eLife journal article supplement (doi:10.7554/elife.79271), 2023-03-13

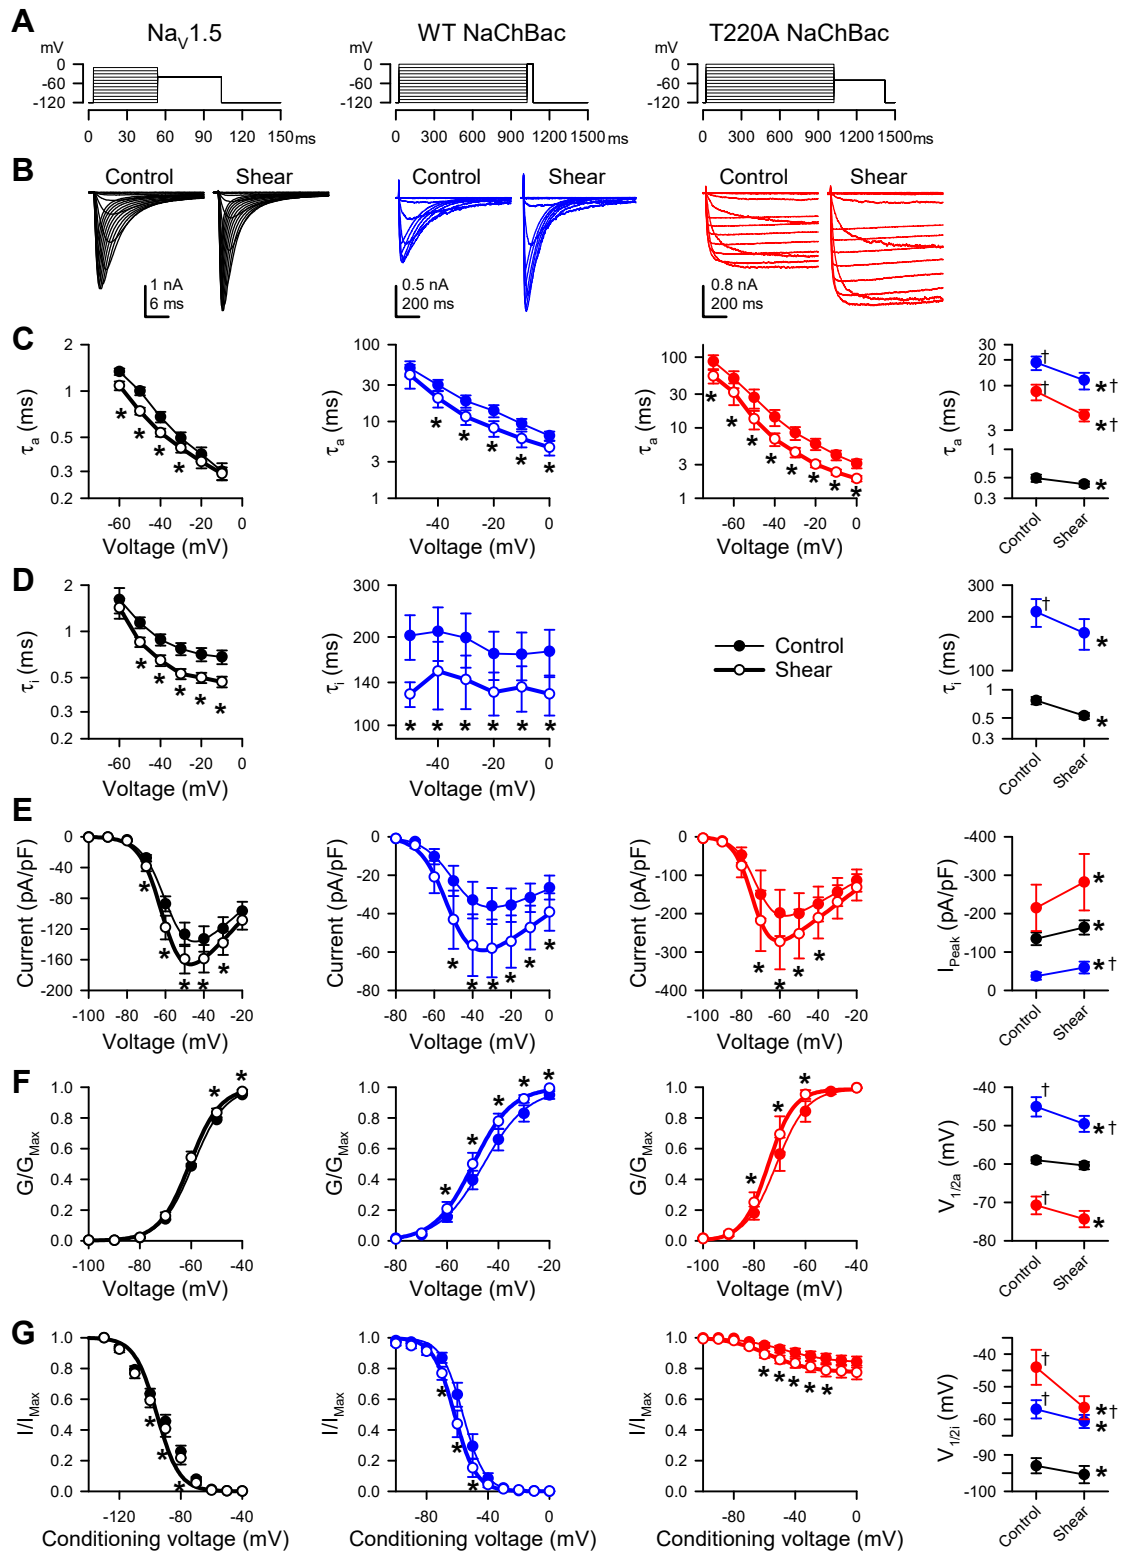

Supplement: supp [file elife_poa_e79271_Figure_1_figure_supplement_1.pdf › elife_poa_e79271_Figure_1_figure_supplement_1.pdf]

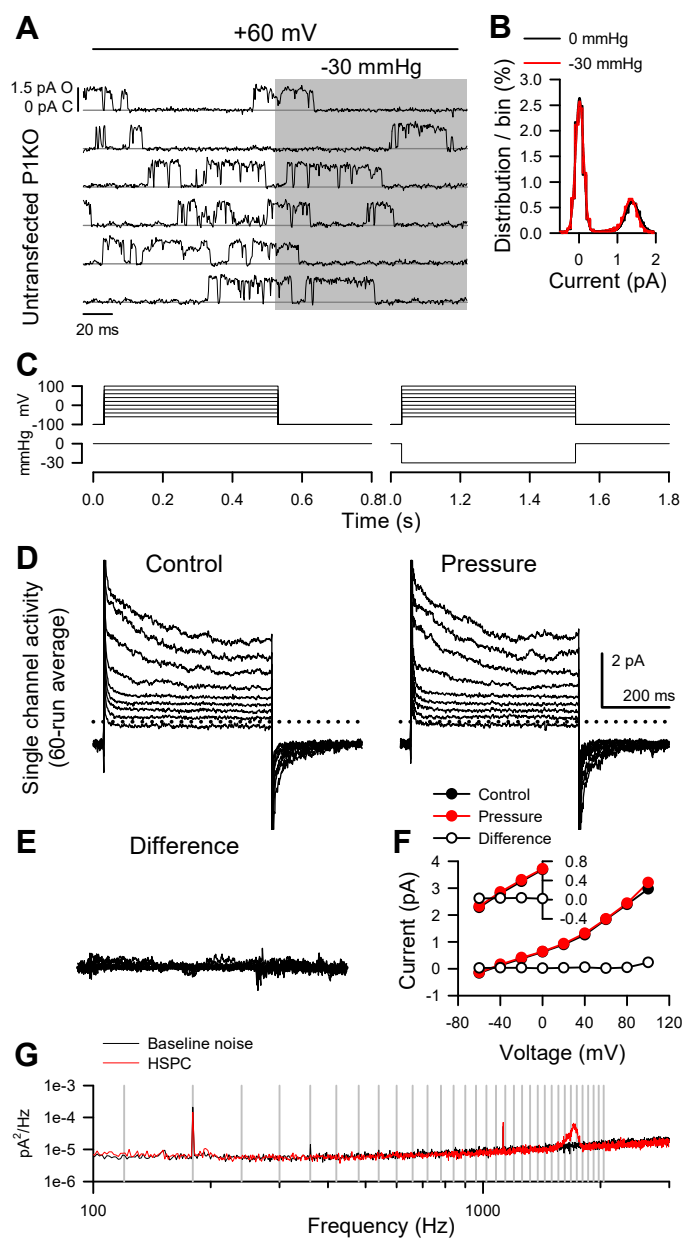

**Figure 2 Supplement**

Supplement: supp [file elife_poa_e79271_Figure_2_figure_supplement_1.pdf › elife_poa_e79271_Figure_2_figure_supplement_1.pdf]

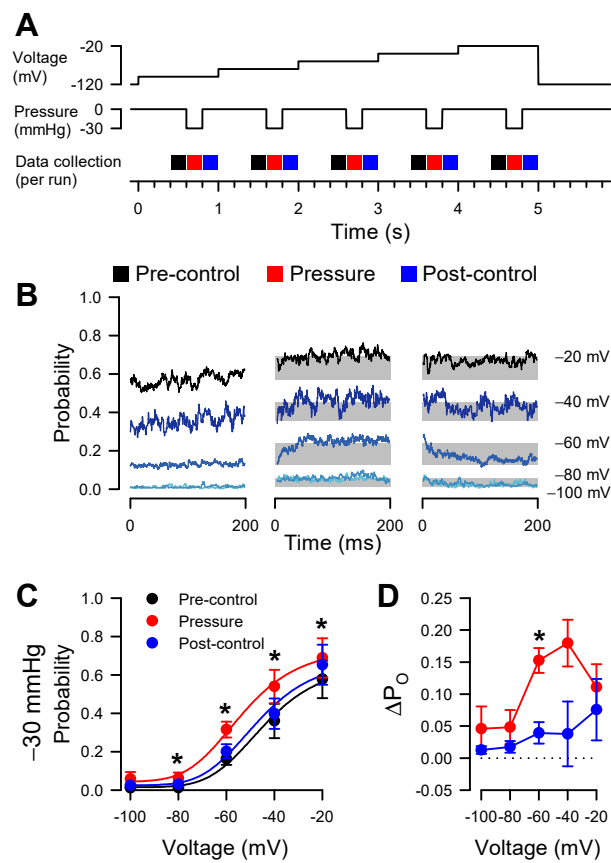

**Figure 3 Supplement 1**

Supplement: supp [file elife_poa_e79271_Figure_3_figure_supplement_1.pdf › elife_poa_e79271_Figure_3_figure_supplement_1.pdf]

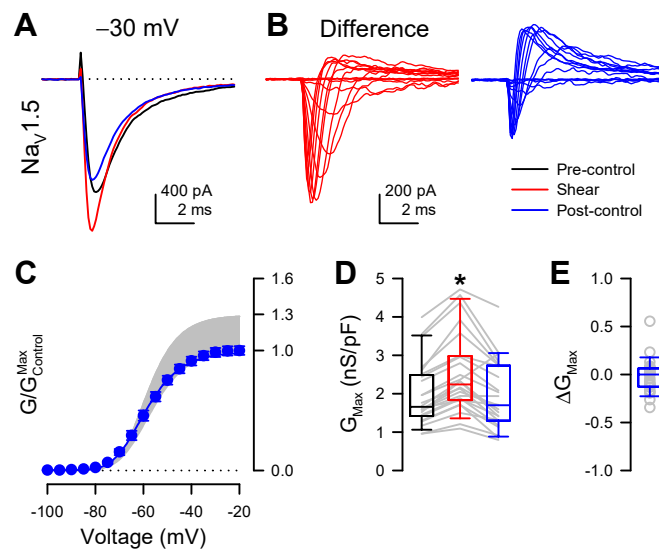

**Figure 3 Supplement 2**

Supplement: supp [file elife_poa_e79271_Figure_3_figure_supplement_2.pdf › elife_poa_e79271_Figure_3_figure_supplement_2.pdf]

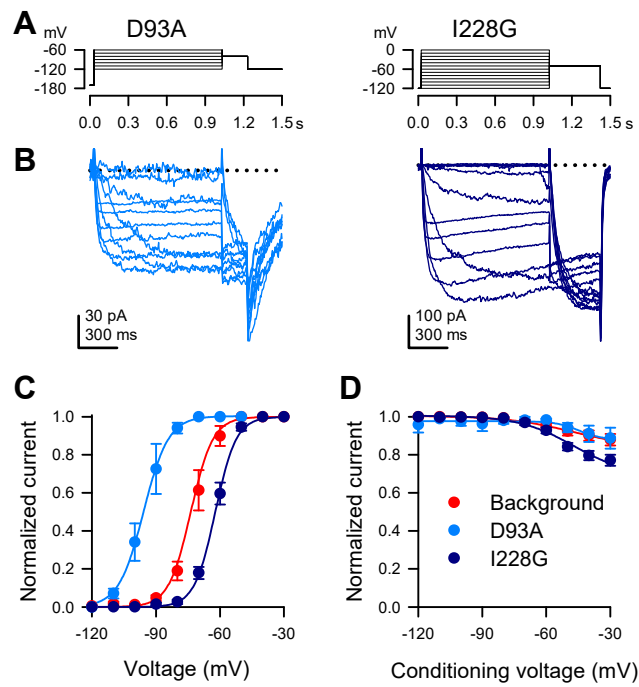

**Figure 5 Supplement 1**

Supplement: supp [file elife_poa_e79271_Figure_5_figure_supplement_1.pdf › elife_poa_e79271_Figure_5_figure_supplement_1.pdf]
